# Supplementary material for: Integrative Computational Framework for Understanding Metabolic Modulation in Leishmania
Source: Front Bioeng Biotechnol. 2019 Nov 19;7:336. doi: 10.3389/fbioe.2019.00336 (PMC6877600; doi:10.3389/fbioe.2019.00336)
Supplement: Table S4 — Cytoscape statistics calculation and curvature measurement of Master and M7 model. [file Table_4.xlsx]

## Sheet: Adjacency_MasterModel
	'b-D-glc'	'prpp'	'r5p'	'gdpman'	'man1p'	'man6p'	'b-D-fr6p'	'b-D-glc6p'	'mannan'	'b-D-fr16p'	'dhap'	'ga3p'	'suc'	'bpg'	'fum'	'3pga'	'mal'	'2pga'	'oaa'	'pep'	'pyr'	'acoa'	'succoa'	'isocit'	'cisaco'	'cit'	'g15l6p'	'gl6p'	'ribl5p'	'sdhpt7p'	'erth4p'	'xyl5p'	'f6p'	'f16p'	'g3p'	'akg'	'ac'	mannose'	fructose'	'btcoa'	'occoa'	'hxcoa'	'dccoa'	'ddcoa'	'stdcoa'	'eictrcoa'	'dcotcoa'	'eicpcoa'	'eictcoa'
'b-D-glc'	0	0	0	0	0	0	0	1	0	0	0	0	0	0	0	0	0	0	0	0	0	0	0	0	0	0	0	0	0	0	0	0	0	0	0	0	0	0	0	0	0	0	0	0	0	0	0	0	0
'prpp'	0	0	0	0	0	0	0	0	0	0	0	0	0	0	0	0	0	0	0	0	0	0	0	0	0	0	0	0	0	0	0	0	0	0	0	0	0	0	0	0	0	0	0	0	0	0	0	0	0
'r5p'	0	1	0	0	0	0	0	0	0	0	0	0	0	0	0	0	0	0	0	0	0	0	0	0	0	0	0	0	0	1	0	0	0	0	0	0	0	0	0	0	0	0	0	0	0	0	0	0	0
'gdpman'	0	0	0	0	0	0	0	0	1	0	0	0	0	0	0	0	0	0	0	0	0	0	0	0	0	0	0	0	0	0	0	0	0	0	0	0	0	0	0	0	0	0	0	0	0	0	0	0	0
'man1p'	0	0	0	1	0	0	0	0	0	0	0	0	0	0	0	0	0	0	0	0	0	0	0	0	0	0	0	0	0	0	0	0	0	0	0	0	0	0	0	0	0	0	0	0	0	0	0	0	0
'man6p'	0	0	0	0	1	0	0	0	0	0	0	0	0	0	0	0	0	0	0	0	0	0	0	0	0	0	0	0	0	0	0	0	0	0	0	0	0	0	0	0	0	0	0	0	0	0	0	0	0
'b-D-fr6p'	0	0	0	0	0	1	0	0	0	1	0	0	0	0	0	0	0	0	0	0	0	0	0	0	0	0	0	0	0	0	0	0	0	0	0	0	0	0	0	0	0	0	0	0	0	0	0	0	0
'b-D-glc6p'	0	0	0	0	0	0	1	0	0	0	0	0	0	0	0	0	0	0	0	0	0	0	0	0	0	0	1	0	0	0	0	0	0	0	0	0	0	0	0	0	0	0	0	0	0	0	0	0	0
'mannan'	0	0	0	0	0	0	0	0	0	0	0	0	0	0	0	0	0	0	0	0	0	0	0	0	0	0	0	0	0	0	0	0	0	0	0	0	0	0	0	0	0	0	0	0	0	0	0	0	0
'b-D-fr16p'	0	0	0	0	0	0	0	0	0	0	1	1	0	0	0	0	0	0	0	0	0	0	0	0	0	0	0	0	0	0	0	0	0	0	0	0	0	0	0	0	0	0	0	0	0	0	0	0	0
'dhap'	0	0	0	0	0	0	0	0	0	0	0	0	0	0	0	0	0	0	0	0	0	0	0	0	0	0	0	0	0	0	0	0	0	0	1	0	0	0	0	0	0	0	0	0	0	0	0	0	0
'ga3p'	0	0	0	0	0	0	0	0	0	0	0	0	0	1	0	0	0	0	0	0	0	0	0	0	0	0	0	0	0	0	0	0	0	0	0	0	0	0	0	0	0	0	0	0	0	0	0	0	0
'suc'	0	0	0	0	0	0	0	0	0	0	0	0	0	0	1	0	0	0	0	0	0	0	0	0	0	0	0	0	0	0	0	0	0	0	0	0	1	0	0	0	0	0	0	0	0	0	0	0	0
'bpg'	0	0	0	0	0	0	0	0	0	0	0	0	0	0	0	1	0	0	0	0	0	0	0	0	0	0	0	0	0	0	0	0	0	0	0	0	0	0	0	0	0	0	0	0	0	0	0	0	0
'fum'	0	0	0	0	0	0	0	0	0	0	0	0	0	0	0	0	1	0	0	0	0	0	0	0	0	0	0	0	0	0	0	0	0	0	0	0	0	0	0	0	0	0	0	0	0	0	0	0	0
'3pga'	0	0	0	0	0	0	0	0	0	0	0	0	0	0	0	0	0	1	0	0	0	0	0	0	0	0	0	0	0	0	0	0	0	0	0	0	0	0	0	0	0	0	0	0	0	0	0	0	0
'mal'	0	0	0	0	0	0	0	0	0	0	0	0	0	0	0	0	0	0	1	0	1	0	0	0	0	0	0	0	0	0	0	0	0	0	0	0	0	0	0	0	0	0	0	0	0	0	0	0	0
'2pga'	0	0	0	0	0	0	0	0	0	0	0	0	0	0	0	0	0	0	0	1	0	0	0	0	0	0	0	0	0	0	0	0	0	0	0	0	0	0	0	0	0	0	0	0	0	0	0	0	0
'oaa'	0	0	0	0	0	0	0	0	0	0	0	0	0	0	0	0	0	0	0	0	0	0	0	0	0	0	0	0	0	0	0	0	0	0	0	0	0	0	0	0	0	0	0	0	0	0	0	0	0
'pep'	0	0	0	0	0	0	0	0	0	0	0	0	0	0	0	0	0	0	0	0	1	0	0	0	0	0	0	0	0	0	0	0	0	0	0	0	0	0	0	0	0	0	0	0	0	0	0	0	0
'pyr'	0	0	0	0	0	0	0	0	0	0	0	0	0	0	0	0	0	0	0	0	0	1	0	0	0	0	0	0	0	0	0	0	0	0	0	0	0	0	0	0	0	0	0	0	0	0	0	0	0
'acoa'	0	0	0	0	0	0	0	0	0	0	0	0	0	0	0	0	0	0	1	0	0	0	0	0	0	1	0	0	0	0	0	0	0	0	0	0	1	0	0	0	0	0	0	0	0	0	0	0	0
'succoa'	0	0	0	0	0	0	0	0	0	0	0	0	1	0	0	0	0	0	0	0	0	0	0	0	0	0	0	0	0	0	0	0	0	0	0	0	0	0	0	0	0	0	0	0	0	0	0	0	0
'isocit'	0	0	0	0	0	0	0	0	0	0	0	0	0	0	0	0	0	0	0	0	0	0	0	0	0	0	0	0	0	0	0	0	0	0	0	1	0	0	0	0	0	0	0	0	0	0	0	0	0
'cisaco'	0	0	0	0	0	0	0	0	0	0	0	0	0	0	0	0	0	0	0	0	0	0	0	1	0	0	0	0	0	0	0	0	0	0	0	0	0	0	0	0	0	0	0	0	0	0	0	0	0
'cit'	0	0	0	0	0	0	0	0	0	0	0	0	0	0	0	0	0	0	0	0	0	0	0	0	1	0	0	0	0	0	0	0	0	0	0	0	0	0	0	0	0	0	0	0	0	0	0	0	0
'g15l6p'	0	0	0	0	0	0	0	0	0	0	0	0	0	0	0	0	0	0	0	0	0	0	0	0	0	0	0	1	0	0	0	0	0	0	0	0	0	0	0	0	0	0	0	0	0	0	0	0	0
'gl6p'	0	0	0	0	0	0	0	0	0	0	0	0	0	0	0	0	0	0	0	0	0	0	0	0	0	0	0	0	1	0	0	0	0	0	0	0	0	0	0	0	0	0	0	0	0	0	0	0	0
'ribl5p'	0	0	1	0	0	0	0	0	0	0	0	0	0	0	0	0	0	0	0	0	0	0	0	0	0	0	0	0	0	0	0	1	0	0	0	0	0	0	0	0	0	0	0	0	0	0	0	0	0
'sdhpt7p'	0	0	0	0	0	0	0	0	0	0	0	0	0	0	0	0	0	0	0	0	0	0	0	0	0	0	0	0	0	0	0	0	0	0	0	0	0	0	0	0	0	0	0	0	0	0	0	0	0
'erth4p'	0	0	0	0	0	0	0	0	0	0	0	0	0	0	0	0	0	0	0	0	0	0	0	0	0	0	0	0	0	1	0	0	1	0	0	0	0	0	0	0	0	0	0	0	0	0	0	0	0
'xyl5p'	0	0	0	0	0	0	0	0	0	0	0	0	0	0	0	0	0	0	0	0	0	0	0	0	0	0	0	0	0	1	0	0	1	0	0	0	0	0	0	0	0	0	0	0	0	0	0	0	0
'f6p'	0	0	0	0	0	0	0	0	0	0	0	0	0	0	0	0	0	0	0	0	0	0	0	0	0	0	0	0	0	1	0	0	0	1	0	0	0	0	0	0	0	0	0	0	0	0	0	0	0
'f16p'	0	0	0	0	0	0	0	0	0	0	0	0	0	0	0	0	0	0	0	0	0	0	0	0	0	0	0	0	0	0	0	0	0	0	0	0	0	0	0	0	0	0	0	0	0	0	0	0	0
'g3p'	0	0	0	0	0	0	0	0	0	0	0	0	0	0	0	0	0	0	0	0	0	0	0	0	0	0	0	0	0	0	0	0	0	0	0	0	0	0	0	0	0	0	0	0	0	0	0	0	0
'akg'	0	0	0	0	0	0	0	0	0	0	0	0	0	0	0	0	0	0	0	0	0	0	1	0	0	0	0	0	0	0	0	0	0	0	0	0	0	0	0	0	0	0	0	0	0	0	0	0	0
'ac'	0	0	0	0	0	0	0	0	0	0	0	0	0	0	0	0	0	0	0	0	0	0	0	0	0	0	0	0	0	0	0	0	0	0	0	0	0	0	0	0	0	0	0	0	0	0	0	0	0
mannose'	0	0	0	0	0	1	0	0	0	0	0	0	0	0	0	0	0	0	0	0	0	0	0	0	0	0	0	0	0	0	0	0	0	0	0	0	0	0	0	0	0	0	0	0	0	0	0	0	0
fructose'	0	0	0	0	0	0	1	0	0	0	0	0	0	0	0	0	0	0	0	0	0	0	0	0	0	0	0	0	0	0	0	0	0	0	0	0	0	0	0	0	0	0	0	0	0	0	0	0	0
'btcoa'	0	0	0	0	0	0	0	0	0	0	0	0	0	0	0	0	0	0	0	0	0	0	0	0	0	0	0	0	0	0	0	0	0	0	0	0	0	0	0	0	0	1	0	0	0	0	0	0	0
'occoa'	0	0	0	0	0	0	0	0	0	0	0	0	0	0	0	0	0	0	0	0	0	0	0	0	0	0	0	0	0	0	0	0	0	0	0	0	0	0	0	0	0	0	1	0	0	0	0	0	0
'hxcoa'	0	0	0	0	0	0	0	0	0	0	0	0	0	0	0	0	0	0	0	0	0	0	0	0	0	0	0	0	0	0	0	0	0	0	0	0	0	0	0	0	1	0	0	0	0	0	0	0	0
'dccoa'	0	0	0	0	0	0	0	0	0	0	0	0	0	0	0	0	0	0	0	0	0	0	0	0	0	0	0	0	0	0	0	0	0	0	0	0	0	0	0	0	0	0	0	1	0	0	0	0	0
'ddcoa'	0	0	0	0	0	0	0	0	0	0	0	0	0	0	0	0	0	0	0	0	0	0	0	0	0	0	0	0	0	0	0	0	0	0	0	0	0	0	0	0	0	0	0	0	0	0	0	0	0
'stdcoa'	0	0	0	0	0	0	0	0	0	0	0	0	0	0	0	0	0	0	0	0	0	0	0	0	0	0	0	0	0	0	0	0	0	0	0	0	0	0	0	0	0	0	0	0	0	0	0	0	1
'eictrcoa'	0	0	0	0	0	0	0	0	0	0	0	0	0	0	0	0	0	0	0	0	0	0	0	0	0	0	0	0	0	0	0	0	0	0	0	0	0	0	0	0	0	0	0	0	0	0	0	0	0
'dcotcoa'	0	0	0	0	0	0	0	0	0	0	0	0	0	0	0	0	0	0	0	0	0	0	0	0	0	0	0	0	0	0	0	0	0	0	0	0	0	0	0	0	0	0	0	0	0	0	0	0	0
'eicpcoa'	0	0	0	0	0	0	0	0	0	0	0	0	0	0	0	0	0	0	0	0	0	0	0	0	0	0	0	0	0	0	0	0	0	0	0	0	0	0	0	0	0	0	0	0	0	0	0	0	0
'eictcoa'	0	0	0	0	0	0	0	0	0	0	0	0	0	0	0	0	0	0	0	0	0	0	0	0	0	0	0	0	0	0	0	0	0	0	0	0	0	0	0	0	0	0	0	0	0	0	0	1	0
'dc4pcoa'	0	0	0	0	0	0	0	0	0	0	0	0	0	0	0	0	0	0	0	0	0	0	0	0	0	0	0	0	0	0	0	0	0	0	0	0	0	0	0	0	0	0	0	0	0	0	0	0	0
'dcopcoa'	0	0	0	0	0	0	0	0	0	0	0	0	0	0	0	0	0	0	0	0	0	0	0	0	0	0	0	0	0	0	0	0	0	0	0	0	0	0	0	0	0	0	0	0	0	0	0	0	0
'dchxcoa'	0	0	0	0	0	0	0	0	0	0	0	0	0	0	0	0	0	0	0	0	0	0	0	0	0	0	0	0	0	0	0	0	0	0	0	0	0	0	0	0	0	0	0	0	0	0	0	0	0
'acdcoa'	0	0	0	0	0	0	0	0	0	0	0	0	0	0	0	0	0	0	0	0	0	0	0	0	0	0	0	0	0	0	0	0	0	0	0	0	0	0	0	0	0	0	0	0	0	0	1	0	0
'malcoa'	0	0	0	0	0	0	0	0	0	0	0	0	0	0	0	0	0	0	0	0	0	0	0	0	0	0	0	0	0	0	0	0	0	0	0	0	0	0	0	0	1	1	1	1	0	1	1	1	0
'strcoa'	0	0	0	0	0	0	0	0	0	0	0	0	0	0	0	0	0	0	0	0	0	0	0	0	0	0	0	0	0	0	0	0	0	0	0	0	0	0	0	0	0	0	0	0	0	0	0	0	0
'pmtcoa'	0	0	0	0	0	0	0	0	0	0	0	0	0	0	0	0	0	0	0	0	0	0	0	0	0	0	0	0	0	0	0	0	0	0	0	0	0	0	0	0	0	0	0	0	0	0	0	0	0
'tdcoa'	0	0	0	0	0	0	0	0	0	0	0	0	0	0	0	0	0	0	0	0	0	0	0	0	0	0	0	0	0	0	0	0	0	0	0	0	0	0	0	0	0	0	0	0	0	0	0	0	0
'lincoa'	0	0	0	0	0	0	0	0	0	0	0	0	0	0	0	0	0	0	0	0	0	0	0	0	0	0	0	0	0	0	0	0	0	0	0	0	0	0	0	0	0	0	0	0	0	0	0	0	0
'olcoa'	0	0	0	0	0	0	0	0	0	0	0	0	0	0	0	0	0	0	0	0	0	0	0	0	0	0	0	0	0	0	0	0	0	0	0	0	0	0	0	0	0	0	0	0	0	0	0	0	0
'glincoa'	0	0	0	0	0	0	0	0	0	0	0	0	0	0	0	0	0	0	0	0	0	0	0	0	0	0	0	0	0	0	0	0	0	0	0	0	0	0	0	0	0	0	0	0	1	1	0	0	0
'a-lincoa'	0	0	0	0	0	0	0	0	0	0	0	0	0	0	0	0	0	0	0	0	0	0	0	0	0	0	0	0	0	0	0	0	0	0	0	0	0	0	0	0	0	0	0	0	0	0	0	0	0
'hmgcoa'	0	0	0	0	0	0	0	0	0	0	0	0	0	0	0	0	0	0	0	0	0	0	0	0	0	0	0	0	0	0	0	0	0	0	0	0	0	0	0	0	0	0	0	0	0	0	0	0	0
'mev5p'	0	0	0	0	0	0	0	0	0	0	0	0	0	0	0	0	0	0	0	0	0	0	0	0	0	0	0	0	0	0	0	0	0	0	0	0	0	0	0	0	0	0	0	0	0	0	0	0	0
'ipdp'	0	0	0	0	0	0	0	0	0	0	0	0	0	0	0	0	0	0	0	0	0	0	0	0	0	0	0	0	0	0	0	0	0	0	0	0	0	0	0	0	0	0	0	0	0	0	0	0	0
'dmpp'	0	0	0	0	0	0	0	0	0	0	0	0	0	0	0	0	0	0	0	0	0	0	0	0	0	0	0	0	0	0	0	0	0	0	0	0	0	0	0	0	0	0	0	0	0	0	0	0	0
'geranylpp'	0	0	0	0	0	0	0	0	0	0	0	0	0	0	0	0	0	0	0	0	0	0	0	0	0	0	0	0	0	0	0	0	0	0	0	0	0	0	0	0	0	0	0	0	0	0	0	0	0
'farnasylpp'	0	0	0	0	0	0	0	0	0	0	0	0	0	0	0	0	0	0	0	0	0	0	0	0	0	0	0	0	0	0	0	0	0	0	0	0	0	0	0	0	0	0	0	0	0	0	0	0	0
'sql'	0	0	0	0	0	0	0	0	0	0	0	0	0	0	0	0	0	0	0	0	0	0	0	0	0	0	0	0	0	0	0	0	0	0	0	0	0	0	0	0	0	0	0	0	0	0	0	0	0
'lanostr'	0	0	0	0	0	0	0	0	0	0	0	0	0	0	0	0	0	0	0	0	0	0	0	0	0	0	0	0	0	0	0	0	0	0	0	0	0	0	0	0	0	0	0	0	0	0	0	0	0
'44mctr'	0	0	0	0	0	0	0	0	0	0	0	0	0	0	0	0	0	0	0	0	0	0	0	0	0	0	0	0	0	0	0	0	0	0	0	0	0	0	0	0	0	0	0	0	0	0	0	0	0
'14dmls'	0	0	0	0	0	0	0	0	0	0	0	0	0	0	0	0	0	0	0	0	0	0	0	0	0	0	0	0	0	0	0	0	0	0	0	0	0	0	0	0	0	0	0	0	0	0	0	0	0
'ergsttr'	0	0	0	0	0	0	0	0	0	0	0	0	0	0	0	0	0	0	0	0	0	0	0	0	0	0	0	0	0	0	0	0	0	0	0	0	0	0	0	0	0	0	0	0	0	0	0	0	0
'3mgcoa'	0	0	0	0	0	0	0	0	0	0	0	0	0	0	0	0	0	0	0	0	0	0	0	0	0	0	0	0	0	0	0	0	0	0	0	0	0	0	0	0	0	0	0	0	0	0	0	0	0
'acacylcoa'	0	0	0	0	0	0	0	0	0	0	0	0	0	0	0	0	0	0	0	0	0	0	0	0	0	0	0	0	0	0	0	0	0	0	0	0	0	0	0	0	0	0	0	0	0	0	0	0	0
'mev'	0	0	0	0	0	0	0	0	0	0	0	0	0	0	0	0	0	0	0	0	0	0	0	0	0	0	0	0	0	0	0	0	0	0	0	0	0	0	0	0	0	0	0	0	0	0	0	0	0
'mev5pp'	0	0	0	0	0	0	0	0	0	0	0	0	0	0	0	0	0	0	0	0	0	0	0	0	0	0	0	0	0	0	0	0	0	0	0	0	0	0	0	0	0	0	0	0	0	0	0	0	0
'fecostr'	0	0	0	0	0	0	0	0	0	0	0	0	0	0	0	0	0	0	0	0	0	0	0	0	0	0	0	0	0	0	0	0	0	0	0	0	0	0	0	0	0	0	0	0	0	0	0	0	0
'ergsttet'	0	0	0	0	0	0	0	0	0	0	0	0	0	0	0	0	0	0	0	0	0	0	0	0	0	0	0	0	0	0	0	0	0	0	0	0	0	0	0	0	0	0	0	0	0	0	0	0	0
'ergstr'	0	0	0	0	0	0	0	0	0	0	0	0	0	0	0	0	0	0	0	0	0	0	0	0	0	0	0	0	0	0	0	0	0	0	0	0	0	0	0	0	0	0	0	0	0	0	0	0	0
'sql23epx'	0	0	0	0	0	0	0	0	0	0	0	0	0	0	0	0	0	0	0	0	0	0	0	0	0	0	0	0	0	0	0	0	0	0	0	0	0	0	0	0	0	0	0	0	0	0	0	0	0
'epistr'	0	0	0	0	0	0	0	0	0	0	0	0	0	0	0	0	0	0	0	0	0	0	0	0	0	0	0	0	0	0	0	0	0	0	0	0	0	0	0	0	0	0	0	0	0	0	0	0	0
'formate'	0	0	0	0	0	0	0	0	0	0	0	0	0	0	0	0	0	0	0	0	0	0	0	0	0	0	0	0	0	0	0	0	0	0	0	0	0	0	0	0	0	0	0	0	0	0	0	0	0
'zym'	0	0	0	0	0	0	0	0	0	0	0	0	0	0	0	0	0	0	0	0	0	0	0	0	0	0	0	0	0	0	0	0	0	0	0	0	0	0	0	0	0	0	0	0	0	0	0	0	0
'glycerol'	0	0	0	0	0	0	0	0	0	0	0	0	0	0	0	0	0	0	0	0	0	0	0	0	0	0	0	0	0	0	0	0	0	0	1	0	0	0	0	0	0	0	0	0	0	0	0	0	0
'clpn'	0	0	0	0	0	0	0	0	0	0	0	0	0	0	0	0	0	0	0	0	0	0	0	0	0	0	0	0	0	0	0	0	0	0	0	0	0	0	0	0	0	0	0	0	0	0	0	0	0
'1ag3p'	0	0	0	0	0	0	0	0	0	0	0	0	0	0	0	0	0	0	0	0	0	0	0	0	0	0	0	0	0	0	0	0	0	0	0	0	0	0	0	0	0	0	0	0	0	0	0	0	0
'pg'	0	0	0	0	0	0	0	0	0	0	0	0	0	0	0	0	0	0	0	0	0	0	0	0	0	0	0	0	0	0	0	0	0	0	0	0	0	0	0	0	0	0	0	0	0	0	0	0	0
'acylcoa'	0	0	0	0	0	0	0	0	0	0	0	0	0	0	0	0	0	0	0	0	0	0	0	0	0	0	0	0	0	0	0	0	0	0	0	0	0	0	0	0	0	0	0	0	0	0	0	0	0
'mino'	0	0	0	0	0	0	0	0	0	0	0	0	0	0	0	0	0	0	0	0	0	0	0	0	0	0	0	0	0	0	0	0	0	0	0	0	0	0	0	0	0	0	0	0	0	0	0	0	0
'cdpdag'	0	0	0	0	0	0	0	0	0	0	0	0	0	0	0	0	0	0	0	0	0	0	0	0	0	0	0	0	0	0	0	0	0	0	0	0	0	0	0	0	0	0	0	0	0	0	0	0	0
'pa'	0	0	0	0	0	0	0	0	0	0	0	0	0	0	0	0	0	0	0	0	0	0	0	0	0	0	0	0	0	0	0	0	0	0	0	0	0	0	0	0	0	0	0	0	0	0	0	0	0
'ptd1ino'	0	0	0	0	0	0	0	0	0	0	0	0	0	0	0	0	0	0	0	0	0	0	0	0	0	0	0	0	0	0	0	0	0	0	0	0	0	0	0	0	0	0	0	0	0	0	0	0	0
'mag'	0	0	0	0	0	0	0	0	0	0	0	0	0	0	0	0	0	0	0	0	0	0	0	0	0	0	0	0	0	0	0	0	0	0	0	0	0	0	0	0	0	0	0	0	0	0	0	0	0
'12dgr'	0	0	0	0	0	0	0	0	0	0	0	0	0	0	0	0	0	0	0	0	0	0	0	0	0	0	0	0	0	0	0	0	0	0	0	0	0	0	0	0	0	0	0	0	0	0	0	0	0
'fa(pmtacid)'	0	0	0	0	0	0	0	0	0	0	0	0	0	0	0	0	0	0	0	0	0	0	0	0	0	0	0	0	0	0	0	0	0	0	0	0	0	0	0	0	0	0	0	0	0	0	0	0	0
'tgr'	0	0	0	0	0	0	0	0	0	0	0	0	0	0	0	0	0	0	0	0	0	0	0	0	0	0	0	0	0	0	0	0	0	0	0	0	0	0	0	0	0	0	0	0	0	0	0	0	0
'cdpe'	0	0	0	0	0	0	0	0	0	0	0	0	0	0	0	0	0	0	0	0	0	0	0	0	0	0	0	0	0	0	0	0	0	0	0	0	0	0	0	0	0	0	0	0	0	0	0	0	0
'peth'	0	0	0	0	0	0	0	0	0	0	0	0	0	0	0	0	0	0	0	0	0	0	0	0	0	0	0	0	0	0	0	0	0	0	0	0	0	0	0	0	0	0	0	0	0	0	0	0	0
'pe'	0	0	0	0	0	0	0	0	0	0	0	0	0	0	0	0	0	0	0	0	0	0	0	0	0	0	0	0	0	0	0	0	0	0	0	0	0	0	0	0	0	0	0	0	0	0	0	0	0
'1g3pe'	0	0	0	0	0	0	0	0	0	0	0	0	0	0	0	0	0	0	0	0	0	0	0	0	0	0	0	0	0	0	0	0	0	0	0	0	0	0	0	0	0	0	0	0	0	0	0	0	0
'g3pe'	0	0	0	0	0	0	0	0	0	0	0	0	0	0	0	0	0	0	0	0	0	0	0	0	0	0	0	0	0	0	0	0	0	0	1	0	0	0	0	0	0	0	0	0	0	0	0	0	0
'ethan'	0	0	0	0	0	0	0	0	0	0	0	0	0	0	0	0	0	0	0	0	0	0	0	0	0	0	0	0	0	0	0	0	0	0	0	0	0	0	0	0	0	0	0	0	0	0	0	0	0
'carboxylate'	0	0	0	0	0	0	0	0	0	0	0	0	0	0	0	0	0	0	0	0	0	0	0	0	0	0	0	0	0	0	0	0	0	0	0	0	0	0	0	0	0	0	0	0	0	0	0	0	0
'mmpe'	0	0	0	0	0	0	0	0	0	0	0	0	0	0	0	0	0	0	0	0	0	0	0	0	0	0	0	0	0	0	0	0	0	0	0	0	0	0	0	0	0	0	0	0	0	0	0	0	0
'1g3pc'	0	0	0	0	0	0	0	0	0	0	0	0	0	0	0	0	0	0	0	0	0	0	0	0	0	0	0	0	0	0	0	0	0	0	0	0	0	0	0	0	0	0	0	0	0	0	0	0	0
'pc'	0	0	0	0	0	0	0	0	0	0	0	0	0	0	0	0	0	0	0	0	0	0	0	0	0	0	0	0	0	0	0	0	0	0	0	0	0	0	0	0	0	0	0	0	0	0	0	0	0
'dimpe'	0	0	0	0	0	0	0	0	0	0	0	0	0	0	0	0	0	0	0	0	0	0	0	0	0	0	0	0	0	0	0	0	0	0	0	0	0	0	0	0	0	0	0	0	0	0	0	0	0
'g3pc'	0	0	0	0	0	0	0	0	0	0	0	0	0	0	0	0	0	0	0	0	0	0	0	0	0	0	0	0	0	0	0	0	0	0	1	0	0	0	0	0	0	0	0	0	0	0	0	0	0
'chol'	0	0	0	0	0	0	0	0	0	0	0	0	0	0	0	0	0	0	0	0	0	0	0	0	0	0	0	0	0	0	0	0	0	0	0	0	0	0	0	0	0	0	0	0	0	0	0	0	0
'carbp'	0	0	0	0	0	0	0	0	0	0	0	0	0	0	0	0	0	0	0	0	0	0	0	0	0	0	0	0	0	0	0	0	0	0	0	0	0	0	0	0	0	0	0	0	0	0	0	0	0
'carblasp'	0	0	0	0	0	0	0	0	0	0	0	0	0	0	0	0	0	0	0	0	0	0	0	0	0	0	0	0	0	0	0	0	0	0	0	0	0	0	0	0	0	0	0	0	0	0	0	0	0
'dhort'	0	0	0	0	0	0	0	0	0	0	0	0	0	0	0	0	0	0	0	0	0	0	0	0	0	0	0	0	0	0	0	0	0	0	0	0	0	0	0	0	0	0	0	0	0	0	0	0	0
'ort'	0	0	0	0	0	0	0	0	0	0	0	0	0	0	0	0	0	0	0	0	0	0	0	0	0	0	0	0	0	0	0	0	0	0	0	0	0	0	0	0	0	0	0	0	0	0	0	0	0
'ortdn5p'	0	1	0	0	0	0	0	0	0	0	0	0	0	0	0	0	0	0	0	0	0	0	0	0	0	0	0	0	0	0	0	0	0	0	0	0	0	0	0	0	0	0	0	0	0	0	0	0	0
'uridine'	0	0	0	0	0	0	0	0	0	0	0	0	0	0	0	0	0	0	0	0	0	0	0	0	0	0	0	0	0	0	0	0	0	0	0	0	0	0	0	0	0	0	0	0	0	0	0	0	0
'cytidine'	0	0	0	0	0	0	0	0	0	0	0	0	0	0	0	0	0	0	0	0	0	0	0	0	0	0	0	0	0	0	0	0	0	0	0	0	0	0	0	0	0	0	0	0	0	0	0	0	0
'cdp'	0	0	0	0	0	0	0	0	0	0	0	0	0	0	0	0	0	0	0	0	0	0	0	0	0	0	0	0	0	0	0	0	0	0	0	0	0	0	0	0	0	0	0	0	0	0	0	0	0
'hxan'	0	0	0	0	0	0	0	0	0	0	0	0	0	0	0	0	0	0	0	0	0	0	0	0	0	0	0	0	0	0	0	0	0	0	0	0	0	0	0	0	0	0	0	0	0	0	0	0	0
'xan'	0	0	0	0	0	0	0	0	0	0	0	0	0	0	0	0	0	0	0	0	0	0	0	0	0	0	0	0	0	0	0	0	0	0	0	0	0	0	0	0	0	0	0	0	0	0	0	0	0
'suc'	0	0	0	0	0	0	0	0	0	0	0	0	0	0	0	0	0	0	0	0	0	0	0	0	0	0	0	0	0	0	0	0	0	0	0	0	0	0	0	0	0	0	0	0	0	0	0	0	0
'gln'	0	0	0	0	0	0	0	0	0	0	0	0	0	0	0	0	0	0	0	0	0	0	0	0	0	0	0	0	0	0	0	0	0	0	0	0	0	0	0	0	0	0	0	0	0	0	0	0	0
'amp'	0	0	0	0	0	0	0	0	0	0	0	0	0	0	0	0	0	0	0	0	0	0	0	0	0	0	0	0	0	0	0	0	0	0	0	0	0	0	0	0	0	0	0	0	0	0	0	0	0
'asp'	0	0	0	0	0	0	0	0	0	0	0	0	0	0	0	0	0	0	0	0	0	0	0	0	0	0	0	0	0	0	0	0	0	0	0	0	0	0	0	0	0	0	0	0	0	0	0	0	0
'fum'	0	0	0	0	0	0	0	0	0	0	0	0	0	0	0	0	0	0	0	0	0	0	0	0	0	0	0	0	0	0	0	0	0	0	0	0	0	0	0	0	0	0	0	0	0	0	0	0	0
'cmp'	0	0	0	0	0	0	0	0	0	0	0	0	0	0	0	0	0	0	0	0	0	0	0	0	0	0	0	0	0	0	0	0	0	0	0	0	0	0	0	0	0	0	0	0	0	0	0	0	0
'ctp'	0	0	0	0	0	0	0	0	0	0	0	0	0	0	0	0	0	0	0	0	0	0	0	0	0	0	0	0	0	0	0	0	0	0	0	0	0	0	0	0	0	0	0	0	0	0	0	0	0
'gmp'	0	0	0	0	0	0	0	0	0	0	0	0	0	0	0	0	0	0	0	0	0	0	0	0	0	0	0	0	0	0	0	0	0	0	0	0	0	0	0	0	0	0	0	0	0	0	0	0	0
'dgmp'	0	0	0	0	0	0	0	0	0	0	0	0	0	0	0	0	0	0	0	0	0	0	0	0	0	0	0	0	0	0	0	0	0	0	0	0	0	0	0	0	0	0	0	0	0	0	0	0	0
'damp'	0	0	0	0	0	0	0	0	0	0	0	0	0	0	0	0	0	0	0	0	0	0	0	0	0	0	0	0	0	0	0	0	0	0	0	0	0	0	0	0	0	0	0	0	0	0	0	0	0
'dcmp'	0	0	0	0	0	0	0	0	0	0	0	0	0	0	0	0	0	0	0	0	0	0	0	0	0	0	0	0	0	0	0	0	0	0	0	0	0	0	0	0	0	0	0	0	0	0	0	0	0
'dtmp'	0	0	0	0	0	0	0	0	0	0	0	0	0	0	0	0	0	0	0	0	0	0	0	0	0	0	0	0	0	0	0	0	0	0	0	0	0	0	0	0	0	0	0	0	0	0	0	0	0
'gtp'	0	0	0	0	0	0	0	0	0	0	0	0	0	0	0	0	0	0	0	0	0	0	0	0	0	0	0	0	0	0	0	0	0	0	0	0	0	0	0	0	0	0	0	0	0	0	0	0	0
'gdp'	0	0	0	0	0	0	0	0	0	0	0	0	0	0	0	0	0	0	0	0	0	0	0	0	0	0	0	0	0	0	0	0	0	0	0	0	0	0	0	0	0	0	0	0	0	0	0	0	0
'atp'	0	0	0	0	0	0	0	0	0	0	0	0	0	0	0	0	0	0	0	0	0	0	0	0	0	0	0	0	0	0	0	0	0	0	0	0	0	0	0	0	0	0	0	0	0	0	0	0	0
'adp'	0	0	0	0	0	0	0	0	0	0	0	0	0	0	0	0	0	0	0	0	0	0	0	0	0	0	0	0	0	0	0	0	0	0	0	0	0	0	0	0	0	0	0	0	0	0	0	0	0
'xmp'	0	0	0	0	0	0	0	0	0	0	0	0	0	0	0	0	0	0	0	0	0	0	0	0	0	0	0	0	0	0	0	0	0	0	0	0	0	0	0	0	0	0	0	0	0	0	0	0	0
'dgdp'	0	0	0	0	0	0	0	0	0	0	0	0	0	0	0	0	0	0	0	0	0	0	0	0	0	0	0	0	0	0	0	0	0	0	0	0	0	0	0	0	0	0	0	0	0	0	0	0	0
'imp'	0	0	0	0	0	0	0	0	0	0	0	0	0	0	0	0	0	0	0	0	0	0	0	0	0	0	0	0	0	0	0	0	0	0	0	0	0	0	0	0	0	0	0	0	0	0	0	0	0
'dadp'	0	0	0	0	0	0	0	0	0	0	0	0	0	0	0	0	0	0	0	0	0	0	0	0	0	0	0	0	0	0	0	0	0	0	0	0	0	0	0	0	0	0	0	0	0	0	0	0	0
'udp'	0	0	0	0	0	0	0	0	0	0	0	0	0	0	0	0	0	0	0	0	0	0	0	0	0	0	0	0	0	0	0	0	0	0	0	0	0	0	0	0	0	0	0	0	0	0	0	0	0
'dcdp'	0	0	0	0	0	0	0	0	0	0	0	0	0	0	0	0	0	0	0	0	0	0	0	0	0	0	0	0	0	0	0	0	0	0	0	0	0	0	0	0	0	0	0	0	0	0	0	0	0
'dudp'	0	0	0	0	0	0	0	0	0	0	0	0	0	0	0	0	0	0	0	0	0	0	0	0	0	0	0	0	0	0	0	0	0	0	0	0	0	0	0	0	0	0	0	0	0	0	0	0	0
'dutp'	0	0	0	0	0	0	0	0	0	0	0	0	0	0	0	0	0	0	0	0	0	0	0	0	0	0	0	0	0	0	0	0	0	0	0	0	0	0	0	0	0	0	0	0	0	0	0	0	0
'ump'	0	0	0	0	0	0	0	0	0	0	0	0	0	0	0	0	0	0	0	0	0	0	0	0	0	0	0	0	0	0	0	0	0	0	0	0	0	0	0	0	0	0	0	0	0	0	0	0	0
't[sh]2'	0	0	0	0	0	0	0	0	0	0	0	0	0	0	0	0	0	0	0	0	0	0	0	0	0	0	0	0	0	0	0	0	0	0	0	0	0	0	0	0	0	0	0	0	0	0	0	0	0
'adomet'	0	0	0	0	0	0	0	0	0	0	0	0	0	0	0	0	0	0	0	0	0	0	0	0	0	0	0	0	0	0	0	0	0	0	0	0	0	0	0	0	0	0	0	0	0	0	0	0	0
'met'	0	0	0	0	0	0	0	0	0	0	0	0	0	0	0	0	0	0	0	0	0	0	0	0	0	0	0	0	0	0	0	0	0	0	0	0	0	0	0	0	0	0	0	0	0	0	0	0	0
'gly'	0	0	0	0	0	0	0	0	0	0	0	0	0	0	0	0	0	0	0	0	0	0	0	0	0	0	0	0	0	0	0	0	0	0	0	0	0	0	0	0	0	0	0	0	0	0	0	0	0
'cys'	0	0	0	0	0	0	0	0	0	0	0	0	0	0	0	0	0	0	0	0	0	0	0	0	0	0	0	0	0	0	0	0	0	0	0	0	0	0	0	0	0	0	0	0	0	0	0	0	0
'arg'	0	0	0	0	0	0	0	0	0	0	0	0	0	0	0	0	0	0	0	0	0	0	0	0	0	0	0	0	0	0	0	0	0	0	0	0	0	0	0	0	0	0	0	0	0	0	0	0	0
'orn'	0	0	0	0	0	0	0	0	0	0	0	0	0	0	0	0	0	0	0	0	0	0	0	0	0	0	0	0	0	0	0	0	0	0	0	0	0	0	0	0	0	0	0	0	0	0	0	0	0
'urea'	0	0	0	0	0	0	0	0	0	0	0	0	0	0	0	0	0	0	0	0	0	0	0	0	0	0	0	0	0	0	0	0	0	0	0	0	0	0	0	0	0	0	0	0	0	0	0	0	0
'adometam'	0	0	0	0	0	0	0	0	0	0	0	0	0	0	0	0	0	0	0	0	0	0	0	0	0	0	0	0	0	0	0	0	0	0	0	0	0	0	0	0	0	0	0	0	0	0	0	0	0
'put'	0	0	0	0	0	0	0	0	0	0	0	0	0	0	0	0	0	0	0	0	0	0	0	0	0	0	0	0	0	0	0	0	0	0	0	0	0	0	0	0	0	0	0	0	0	0	0	0	0
'g-glycys'	0	0	0	0	0	0	0	0	0	0	0	0	0	0	0	0	0	0	0	0	0	0	0	0	0	0	0	0	0	0	0	0	0	0	0	0	0	0	0	0	0	0	0	0	0	0	0	0	0
'gsh'	0	0	0	0	0	0	0	0	0	0	0	0	0	0	0	0	0	0	0	0	0	0	0	0	0	0	0	0	0	0	0	0	0	0	0	0	0	0	0	0	0	0	0	0	0	0	0	0	0
'spd'	0	0	0	0	0	0	0	0	0	0	0	0	0	0	0	0	0	0	0	0	0	0	0	0	0	0	0	0	0	0	0	0	0	0	0	0	0	0	0	0	0	0	0	0	0	0	0	0	0
'gspd'	0	0	0	0	0	0	0	0	0	0	0	0	0	0	0	0	0	0	0	0	0	0	0	0	0	0	0	0	0	0	0	0	0	0	0	0	0	0	0	0	0	0	0	0	0	0	0	0	0
'ts2'	0	0	0	0	0	0	0	0	0	0	0	0	0	0	0	0	0	0	0	0	0	0	0	0	0	0	0	0	0	0	0	0	0	0	0	0	0	0	0	0	0	0	0	0	0	0	0	0	0
'glu'	0	0	0	0	0	0	0	0	0	0	0	0	0	0	0	0	0	0	0	0	0	0	0	0	0	0	0	0	0	0	0	0	0	0	0	0	0	0	0	0	0	0	0	0	0	0	0	0	0
'mg'	0	0	0	0	0	0	0	0	0	0	1	1	0	0	0	0	0	0	0	0	0	0	0	0	0	0	0	0	0	0	0	0	0	0	0	0	0	0	0	0	0	0	0	0	0	0	0	0	0
'hta'	0	0	0	0	0	0	0	0	0	0	0	0	0	0	0	0	0	0	0	0	0	0	0	0	0	0	0	0	0	0	0	0	0	0	0	0	0	0	0	0	0	0	0	0	0	0	0	0	0
'D-lacgsh'	0	0	0	0	0	0	0	0	0	0	0	0	0	0	0	0	0	0	0	0	0	0	0	0	0	0	0	0	0	0	0	0	0	0	0	0	0	0	0	0	0	0	0	0	0	0	0	0	0
'D-lac'	0	0	0	0	0	0	0	0	0	0	0	0	0	0	0	0	0	0	0	0	1	0	0	0	0	0	0	0	0	0	0	0	0	0	0	0	0	0	0	0	0	0	0	0	0	0	0	0	0
'L-lactald'	0	0	0	0	0	0	0	0	0	0	0	0	0	0	0	0	0	0	0	0	0	0	0	0	0	0	0	0	0	0	0	0	0	0	0	0	0	0	0	0	0	0	0	0	0	0	0	0	0
'L-lac'	0	0	0	0	0	0	0	0	0	0	0	0	0	0	0	0	0	0	0	0	0	0	0	0	0	0	0	0	0	0	0	0	0	0	0	0	0	0	0	0	0	0	0	0	0	0	0	0	0
'formate'	0	0	0	0	0	0	0	0	0	0	0	0	0	0	0	0	0	0	0	0	0	0	0	0	0	0	0	0	0	0	0	0	0	0	0	0	0	0	0	0	0	0	0	0	0	0	0	0	0
'ala'	0	0	0	0	0	0	0	0	0	0	0	0	0	0	0	0	0	0		0	1	0	0	0	0	0	0	0	0	0	0	0	0	0	0	0	0	0	0	0	0	0	0	0	0	0	0	0	0
'asp'	0	0	0	0	0	0	0	0	0	0	0	0	0	0	0	0	0	0	1	0	0	0	0	0	0	0	0	0	0	0	0	0	0	0	0	0	0	0	0	0	0	0	0	0	0	0	0	0	0
'gln'	0	0	0	0	0	0	0	0	0	0	0	0	0	0	0	0	0	0	0	0	0	0	0	0	0	0	0	0	0	0	0	0	0	0	0	0	0	0	0	0	0	0	0	0	0	0	0	0	0
'met'	0	0	0	0	0	0	0	0	0	0	0	0	0	0	0	0	0	0	0	0	0	0	0	0	0	0	0	0	0	0	0	0	0	0	0	0	0	0	0	0	0	0	0	0	0	0	0	0	0
'thf'	0	0	0	0	0	0	0	0	0	0	0	0	0	0	0	0	0	0	0	0	0	0	0	0	0	0	0	0	0	0	0	0	0	0	0	0	0	0	0	0	0	0	0	0	0	0	0	0	0
'gly'	0	0	0	0	0	0	0	0	0	0	0	0	0	0	0	0	0	0	0	0	0	0	0	0	0	0	0	0	0	0	0	0	0	0	0	0	0	0	0	0	0	0	0	0	0	0	0	0	0
'mthf'	0	0	0	0	0	0	0	0	0	0	0	0	0	0	0	0	0	0	0	0	0	0	0	0	0	0	0	0	0	0	0	0	0	0	0	0	0	0	0	0	0	0	0	0	0	0	0	0	0
'cys'	0	0	0	0	0	0	0	0	0	0	0	0	0	0	0	0	0	0	0	0	0	0	0	0	0	0	0	0	0	0	0	0	0	0	0	0	0	0	0	0	0	0	0	0	0	0	0	0	0
'ser'	0	0	0	0	0	0	0	0	0	0	0	0	0	0	0	0	0	0	0	0	0	0	0	0	0	0	0	0	0	0	0	0	0	0	0	0	0	0	0	0	0	0	0	0	0	0	0	0	0
'glu'	0	0	0	0	0	0	0	0	0	0	0	0	0	0	0	0	0	0	0	0	0	0	0	0	0	0	0	0	0	0	0	0	0	0	0	0	0	0	0	0	0	0	0	0	0	0	0	0	0
'pro'	0	0	0	0	0	0	0	0	0	0	0	0	0	0	0	0	0	0	0	0	0	0	0	0	0	0	0	0	0	0	0	0	0	0	0	0	0	0	0	0	0	0	0	0	0	0	0	0	0
'acald'	0	0	0	0	0	0	0	0	0	0	0	0	0	0	0	0	0	0	0	0	0	0	0	0	0	0	0	0	0	0	0	0	0	0	0	0	0	0	0	0	0	0	0	0	0	0	0	0	0
'thr'	0	0	0	0	0	0	0	0	0	0	0	0	0	0	0	0	0	0	0	0	0	0	0	0	0	0	0	0	0	0	0	0	0	0	0	0	0	0	0	0	0	0	0	0	0	0	0	0	0
'asn'	0	0	0	0	0	0	0	0	0	0	0	0	0	0	0	0	0	0	0	0	0	0	0	0	0	0	0	0	0	0	0	0	0	0	0	0	0	0	0	0	0	0	0	0	0	0	0	0	0
'trp'	0	0	0	0	0	0	0	0	0	0	0	0	0	0	0	0	0	0	0	0	0	0	0	0	0	0	0	0	0	0	0	0	0	0	0	0	0	0	0	0	0	0	0	0	0	0	0	0	0
'anthra'	0	0	0	0	0	0	0	0	0	0	0	0	0	0	0	0	0	0	0	0	0	0	0	0	0	0	0	0	0	0	0	0	0	0	0	0	0	0	0	0	0	0	0	0	0	0	0	0	0
'phe'	0	0	0	0	0	0	0	0	0	0	0	0	0	0	0	0	0	0	0	0	0	0	0	0	0	0	0	0	0	0	0	0	0	0	0	0	0	0	0	0	0	0	0	0	0	0	0	0	0
'tyr'	0	0	0	0	0	0	0	0	0	0	0	0	0	0	0	0	0	0	0	0	0	0	0	0	0	0	0	0	0	0	0	0	0	0	0	0	0	0	0	0	0	0	0	0	0	0	0	0	0
'fol'	0	0	0	0	0	0	0	0	0	0	0	0	0	0	0	0	0	0	0	0	0	0	0	0	0	0	0	0	0	0	0	0	0	0	0	0	0	0	0	0	0	0	0	0	0	0	0	0	0
'dhf'	0	0	0	0	0	0	0	0	0	0	0	0	0	0	0	0	0	0	0	0	0	0	0	0	0	0	0	0	0	0	0	0	0	0	0	0	0	0	0	0	0	0	0	0	0	0	0	0	0
'dhpt'	0	0	0	0	0	0	0	0	0	0	0	0	0	0	0	0	0	0	0	0	0	0	0	0	0	0	0	0	0	0	0	0	0	0	0	0	0	0	0	0	0	0	0	0	0	0	0	0	0
'thfglu'	0	0	0	0	0	0	0	0	0	0	0	0	0	0	0	0	0	0	0	0	0	0	0	0	0	0	0	0	0	0	0	0	0	0	0	0	0	0	0	0	0	0	0	0	0	0	0	0	0
'thfpolyglu'	0	0	0	0	0	0	0	0	0	0	0	0	0	0	0	0	0	0	0	0	0	0	0	0	0	0	0	0	0	0	0	0	0	0	0	0	0	0	0	0	0	0	0	0	0	0	0	0	0
'3phpyr'	0	0	0	0	0	0	0	0	0	0	0	0	0	0	0	0	0	0	0	0	0	0	0	0	0	0	0	0	0	0	0	0	0	0	0	1	0	0	0	0	0	0	0	0	0	0	0	0	0
'3pser'	0	0	0	0	0	0	0	0	0	0	0	0	0	0	0	0	0	0	0	0	0	0	0	0	0	0	0	0	0	0	0	0	0	0	0	0	0	0	0	0	0	0	0	0	0	0	0	0	0
'oacser'	0	0	0	0	0	0	0	0	0	0	0	0	0	0	0	0	0	0	0	0	0	0	0	0	0	0	0	0	0	0	0	0	0	0	0	0	0	0	0	0	0	0	0	0	0	0	0	0	0
'aspsa'	0	0	0	0	0	0	0	0	0	0	0	0	0	0	0	0	0	0	0	0	0	0	0	0	0	0	0	0	0	0	0	0	0	0	0	0	0	0	0	0	0	0	0	0	0	0	0	0	0
'hser'	0	0	0	0	0	0	0	0	0	0	0	0	0	0	0	0	0	0	0	0	0	0	0	0	0	0	0	0	0	0	0	0	0	0	0	0	0	0	0	0	0	0	0	0	0	0	0	0	0
'phser'	0	0	0	0	0	0	0	0	0	0	0	0	0	0	0	0	0	0	0	0	0	0	0	0	0	0	0	0	0	0	0	0	0	0	0	0	0	0	0	0	0	0	0	0	0	0	0	0	0
'1pl5c'	0	0	0	0	0	0	0	0	0	0	0	0	0	0	0	0	0	0	0	0	0	0	0	0	0	0	0	0	0	0	0	0	0	0	0	0	0	0	0	0	0	0	0	0	0	0	0	0	0
'cysthion'	0	0	0	0	0	0	0	0	0	0	0	0	0	0	0	0	0	0	0	0	0	0	0	0	0	0	0	0	0	0	0	0	0	0	0	0	0	0	0	0	0	0	0	0	0	0	0	0	0
'hcys'	0	0	0	0	0	0	0	0	0	0	0	0	0	0	0	0	0	0	0	0	0	0	0	0	0	0	0	0	0	0	0	0	0	0	0	0	0	0	0	0	0	0	0	0	0	0	0	0	0
'phepyr'	0	0	0	0	0	0	0	0	0	0	0	0	0	0	0	0	0	0	0	0	0	0	0	0	0	0	0	0	0	0	0	0	0	0	0	0	0	0	0	0	0	0	0	0	0	0	0	0	0
'34hpp'	0	0	0	0	0	0	0	0	0	0	0	0	0	0	0	0	0	0	0	0	0	0	0	0	0	0	0	0	0	0	0	0	0	0	0	0	0	0	0	0	0	0	0	0	0	0	0	0	0
'4m2opent'	0	0	0	0	0	0	0	0	0	0	0	0	0	0	0	0	0	0	0	0	0	0	0	0	0	0	0	0	0	0	0	0	0	0	0	0	0	0	0	0	0	0	0	0	0	0	0	0	0
'leu'	0	0	0	0	0	0	0	0	0	0	0	0	0	0	0	0	0	0	0	0	0	0	0	0	0	0	0	0	0	0	0	0	0	0	0	0	0	0	0	0	0	0	0	0	0	0	0	0	0
'2oivlrt'	0	0	0	0	0	0	0	0	0	0	0	0	0	0	0	0	0	0	0	0	0	0	0	0	0	0	0	0	0	0	0	0	0	0	0	0	0	0	0	0	0	0	0	0	0	0	0	0	0
'val'	0	0	0	0	0	0	0	0	0	0	0	0	0	0	0	0	0	0	0	0	0	0	0	0	0	0	0	0	0	0	0	0	0	0	0	0	0	0	0	0	0	0	0	0	0	0	0	0	0
'3m2opent'	0	0	0	0	0	0	0	0	0	0	0	0	0	0	0	0	0	0	0	0	0	0	0	0	0	0	0	0	0	0	0	0	0	0	0	0	0	0	0	0	0	0	0	0	0	0	0	0	0
'ile'	0	0	0	0	0	0	0	0	0	0	0	0	0	0	0	0	0	0	0	0	0	0	0	0	0	0	0	0	0	0	0	0	0	0	0	0	0	0	0	0	0	0	0	0	0	0	0	0	0
'nflk'	0	0	0	0	0	0	0	0	0	0	0	0	0	0	0	0	0	0	0	0	0	0	0	0	0	0	0	0	0	0	0	0	0	0	0	0	0	0	0	0	0	0	0	0	0	0	0	0	0
'l-kyn'	0	0	0	0	0	0	0	0	0	0	0	0	0	0	0	0	0	0	0	0	0	0	0	0	0	0	0	0	0	0	0	0	0	0	0	0	0	0	0	0	0	0	0	0	0	0	0	0	0
'3mob'	0	0	0	0	0	0	0	0	0	0	0	0	0	0	0	0	0	0	0	0	0	0	0	0	0	0	0	0	0	0	0	0	0	0	0	0	0	0	0	0	0	0	0	0	0	0	0	0	0
'3mop'	0	0	0	0	0	0	0	0	0	0	0	0	0	0	0	0	0	0	0	0	0	0	0	0	0	0	0	0	0	0	0	0	0	0	0	0	0	0	0	0	0	0	0	0	0	0	0	0	0
'4mop'	0	0	0	0	0	0	0	0	0	0	0	0	0	0	0	0	0	0	0	0	0	0	0	0	0	0	0	0	0	0	0	0	0	0	0	0	0	0	0	0	0	0	0	0	0	0	0	0	0
'3mbutdhla'	0	0	0	0	0	0	0	0	0	0	0	0	0	0	0	0	0	0	0	0	0	0	0	0	0	0	0	0	0	0	0	0	0	0	0	0	0	0	0	0	0	0	0	0	0	0	0	0	0
'2mbutdhla'	0	0	0	0	0	0	0	0	0	0	0	0	0	0	0	0	0	0	0	0	0	0	0	0	0	0	0	0	0	0	0	0	0	0	0	0	0	0	0	0	0	0	0	0	0	0	0	0	0
'2mpdhla'	0	0	0	0	0	0	0	0	0	0	0	0	0	0	0	0	0	0	0	0	0	0	0	0	0	0	0	0	0	0	0	0	0	0	0	0	0	0	0	0	0	0	0	0	0	0	0	0	0
'ivcoa'	0	0	0	0	0	0	0	0	0	0	0	0	0	0	0	0	0	0	0	0	0	0	0	0	0	0	0	0	0	0	0	0	0	0	0	0	0	0	0	0	0	0	0	0	0	0	0	0	0
'2mbcoa'	0	0	0	0	0	0	0	0	0	0	0	0	0	0	0	0	0	0	0	0	0	0	0	0	0	0	0	0	0	0	0	0	0	0	0	0	0	0	0	0	0	0	0	0	0	0	0	0	0
'ibcoa'	0	0	0	0	0	0	0	0	0	0	0	0	0	0	0	0	0	0	0	0	0	0	0	0	0	0	0	0	0	0	0	0	0	0	0	0	0	0	0	0	0	0	0	0	0	0	0	0	0
'2mbecoa'	0	0	0	0	0	0	0	0	0	0	0	0	0	0	0	0	0	0	0	0	0	0	0	0	0	0	0	0	0	0	0	0	0	0	0	0	0	0	0	0	0	0	0	0	0	0	0	0	0
'3mb2coa'	0	0	0	0	0	0	0	0	0	0	0	0	0	0	0	0	0	0	0	0	0	0	0	0	0	0	0	0	0	0	0	0	0	0	0	0	0	0	0	0	0	0	0	0	0	0	0	0	0
'macoa'	0	0	0	0	0	0	0	0	0	0	0	0	0	0	0	0	0	0	0	0	0	0	0	0	0	0	0	0	0	0	0	0	0	0	0	0	0	0	0	0	0	0	0	0	0	0	0	0	0
'3hibcoa'	0	0	0	0	0	0	0	0	0	0	0	0	0	0	0	0	0	0	0	0	0	0	0	0	0	0	0	0	0	0	0	0	0	0	0	0	0	0	0	0	0	0	0	0	0	0	0	0	0
'3hmbcoa'	0	0	0	0	0	0	0	0	0	0	0	0	0	0	0	0	0	0	0	0	0	0	0	0	0	0	0	0	0	0	0	0	0	0	0	0	0	0	0	0	0	0	0	0	0	0	0	0	0
'3hib'	0	0	0	0	0	0	0	0	0	0	0	0	0	0	0	0	0	0	0	0	0	0	0	0	0	0	0	0	0	0	0	0	0	0	0	0	0	0	0	0	0	0	0	0	0	0	0	0	0
'2maacoa'	0	0	0	0	0	0	0	0	0	0	0	0	0	0	0	0	0	0	0	0	0	1	0	0	0	0	0	0	0	0	0	0	0	0	0	0	0	0	0	0	0	0	0	0	0	0	0	0	0
'mmsald'	0	0	0	0	0	0	0	0	0	0	0	0	0	0	0	0	0	0	0	0	0	0	0	0	0	0	0	0	0	0	0	0	0	0	0	0	0	0	0	0	0	0	0	0	0	0	0	0	0
'mmalonat'	0	0	0	0	0	0	0	0	0	0	0	0	0	0	0	0	0	0	0	0	0	0	0	0	0	0	0	0	0	0	0	0	0	0	0	0	0	0	0	0	0	0	0	0	0	0	0	0	0
'ppcoa'	0	0	0	0	0	0	0	0	0	0	0	0	0	0	0	0	0	0	0	0	0	0	0	0	0	0	0	0	0	0	0	0	0	0	0	0	0	0	0	0	0	0	0	0	0	0	0	0	0
'malcoa'	0	0	0	0	0	0	0	0	0	0	0	0	0	0	0	0	0	0	0	0	0	0	0	0	0	0	0	0	0	0	0	0	0	0	0	0	0	0	0	0	0	0	0	0	0	0	0	0	0
'3mercpyr'	0	0	0	0	0	0	0	0	0	0	0	0	0	0	0	0	0	0	0	0	0	0	0	0	0	0	0	0	0	0	0	0	0	0	0	0	0	0	0	0	0	0	0	0	0	0	0	0	0
'orn'	0	0	0	0	0	0	0	0	0	0	0	0	0	0	0	0	0	0	0	0	0	0	0	0	0	0	0	0	0	0	0	0	0	0	0	0	0	0	0	0	0	0	0	0	0	0	0	0	0
'arg'	0	0	0	0	0	0	0	0	0	0	0	0	0	0	0	0	0	0	0	0	0	0	0	0	0	0	0	0	0	0	0	0	0	0	0	0	0	0	0	0	0	0	0	0	0	0	0	0	0
'put'	0	0	0	0	0	0	0	0	0	0	0	0	0	0	0	0	0	0	0	0	0	0	0	0	0	0	0	0	0	0	0	0	0	0	0	0	0	0	0	0	0	0	0	0	0	0	0	0	0
'spd'	0	0	0	0	0	0	0	0	0	0	0	0	0	0	0	0	0	0	0	0	0	0	0	0	0	0	0	0	0	0	0	0	0	0	0	0	0	0	0	0	0	0	0	0	0	0	0	0	0
'adometam'	0	0	0	0	0	0	0	0	0	0	0	0	0	0	0	0	0	0	0	0	0	0	0	0	0	0	0	0	0	0	0	0	0	0	0	0	0	0	0	0	0	0	0	0	0	0	0	0	0
'adomet'	0	0	0	0	0	0	0	0	0	0	0	0	0	0	0	0	0	0	0	0	0	0	0	0	0	0	0	0	0	0	0	0	0	0	0	0	0	0	0	0	0	0	0	0	0	0	0	0	0
'g-glucys'	0	0	0	0	0	0	0	0	0	0	0	0	0	0	0	0	0	0	0	0	0	0	0	0	0	0	0	0	0	0	0	0	0	0	0	0	0	0	0	0	0	0	0	0	0	0	0	0	0
'gsh'	0	0	0	0	0	0	0	0	0	0	0	0	0	0	0	0	0	0	0	0	0	0	0	0	0	0	0	0	0	0	0	0	0	0	0	0	0	0	0	0	0	0	0	0	0	0	0	0	0
'lplprot'	0	0	0	0	0	0	0	0	0	0	0	0	0	0	0	0	0	0	0	0	0	0	0	0	0	0	0	0	0	0	0	0	0	0	0	0	0	0	0	0	0	0	0	0	0	0	0	0	0
'dhlplprot'	0	0	0	0	0	0	0	0	0	0	0	0	0	0	0	0	0	0	0	0	0	0	0	0	0	0	0	0	0	0	0	0	0	0	0	0	0	0	0	0	0	0	0	0	0	0	0	0	0
'amlplprot'	0	0	0	0	0	0	0	0	0	0	0	0	0	0	0	0	0	0	0	0	0	0	0	0	0	0	0	0	0	0	0	0	0	0	0	0	0	0	0	0	0	0	0	0	0	0	0	0	0
'42aphdob'	0	0	0	0	0	0	0	0	0	0	0	0	0	0	0	0	0	0	0	0	0	0	0	0	0	0	0	0	0	0	0	0	0	0	0	0	0	0	0	0	0	0	0	0	0	0	0	0	0
'adesuc'	0	0	0	0	0	0	0	0	0	0	0	0	0	0	0	0	0	0	0	0	0	0	0	0	0	0	0	0	0	0	0	0	0	0	0	0	0	0	0	0	0	0	0	0	0	0	0	0	0
'fum'	0	0	0	0	0	0	0	0	0	0	0	0	0	0	0	0	0	0	0	0	0	0	0	0	0	0	0	0	0	0	0	0	0	0	0	0	0	0	0	0	0	0	0	0	0	0	0	0	0
[truncated: 195 more columns]

## Sheet: cytoscape_states_MasterModel
name	Betweenness Centrality	Closeness Centrality	Clustering Coefficient	EdgeCount	Indegree	Neighborhood Connectivity	Outdegree
'acoa'	0.108441	0.113193	0	8	2	4.375	6
'hta'	0.10458	0.114806	0	5	2	3.33333	3
't[sh]2'	0.0973611	0.103056	0.0833333	5	4	3	1
'pyr'	0.0857225	0.103056	0	6	4	3.4	2
'mg'	0.0809689	0.118658	0	7	3	2.75	4
'akg'	0.0664203	0.111796	0	4	2	4	2
'3pga'	0.0558366	0.119538	0	3	1	2.33333	2
'ga3p'	0.0555605	0.118561	0	4	2	3	2
'gsh'	0.0544841	0.0945858	0.05	5	3	3	2
'bpg'	0.0543089	0.107567	0	2	1	3	1
'3phpyr'	0.0511624	0.114534	0	3	1	3	2
'glu'	0.0476191	0.109682	0.0138889	9	1	2.88889	8
'gspd'	0.0364881	0.0940337	0.166667	3	2	4	1
'cys'	0.0353175	0.0812325	0.05	5	2	2.8	3
'spd'	0.033869	0.0867225	0	3	2	2.33333	1
'oacser'	0.0330357	0.0754815	0.166667	3	2	6	1
'D-lac'	0.0321197	0.0939728	0	2	1	3.5	1
'g3p'	0.032004	0.198113	0	5	4	2.8	1
'dhap'	0.0314434	0.109682	0	4	2	4	2
'1ag3p'	0.030754	0.233333	0.166667	3	2	4	1
'D-lacgsh'	0.0305919	0.0863609	0	2	1	2.5	1
'pa'	0.0297222	0.283784	0.166667	5	3	3.75	2
'isocit'	0.0291468	0.101186	0	2	1	3	1
'hmgcoa'	0.0289881	0.122581	0	4	3	3.25	1
'mal'	0.0287698	0.0940947	0	3	1	4	2
'mev'	0.0278175	0.132353	0	2	1	3	1
'cisaco'	0.027619	0.0924155	0	2	1	2	1
'fum'	0.0272421	0.0864639	0	4	3	3	1
'mev5p'	0.0266071	0.144068	0	2	1	2	1
'cit'	0.0260913	0.085044	0	2	1	5	1
'mev5pp'	0.0253571	0.158416	0	2	1	3	1
'ipdp'	0.0240675	0.176471	0.166667	4	1	2.5	3
'12dgr'	0.0240079	0.35	0.0666667	8	3	3.33333	5
'g-glycys'	0.0237103	0.0868784	0	3	2	6.33333	1
'adometam'	0.0236508	0.0804662	0	2	1	2.5	1
'adomet'	0.022123	0.0750518	0	2	1	2.5	1
'malcoa'	0.0219444	0.823529	0.0448718	13	2	3.23077	11
'2maacoa'	0.0209722	0.103498	0	3	1	3.66667	2
'met'	0.0205952	0.0703201	0	3	2	2.33333	1
'suc'	0.0205076	0.0843514	0	4	1	2.75	3
'farnasylpp'	0.0199603	0.171429	0.166667	3	2	3	1
'3hmbcoa'	0.0194444	0.0945241	0	2	1	2.5	1
'succoa'	0.0189798	0.0781671	0	2	1	4	1
'sql'	0.0185119	0.189655	0	2	1	2.5	1
'ser'	0.0184722	0.0879321	0.05	5	1	3	4
'2mbecoa'	0.0179167	0.0869826	0	2	1	2	1
'sql23epx'	0.0170238	0.212766	0	2	1	2.5	1
'3pser'	0.0169444	0.081278	0	2	1	4	1
'pe'	0.016746	0.233333	0	5	2	3	3
'2mbcoa'	0.0163889	0.0805556	0	2	1	2	1
'lanostr'	0.015496	0.243243	0	3	1	2	2
'2mbutdhla'	0.0148611	0.0750129	0	2	1	2	1
'3mop'	0.0133333	0.0701839	0	2	1	2.5	1
'44mctr'	0.0122222	0.25	0	2	1	2.5	1
'ile'	0.0118056	0.0659391	0	3	2	4	1
'hcys'	0.0115873	0.0676306	0	3	1	2.66667	2
'val'	0.0114087	0.12234	0	3	2	4	1
'b-D-fr16p'	0.0113889	0.110355	0	3	1	3.33333	2
'ort'	0.010754	0.363636	0	3	2	3.33333	1
'14dmls'	0.0105952	0.285714	0	2	1	2	1
'3mob'	0.0104563	0.133333	0	2	1	2.5	1
'cysthion'	0.0100595	0.0637643	0	2	1	4	1
'ortdn5p'	0.00952381	0.5	0	3	1	4	2
'2mpdhla'	0.00946429	0.146853	0	2	1	2	1
'dhort'	0.00910714	0.0843023	0	3	1	3.33333	2
'zym'	0.00892857	0.333333	0	2	1	2	1
'b-D-fr6p'	0.00878968	0.102027	0	4	2	2.5	2
'mthf'	0.00869048	0.0661232	0	2	1	3	1
'ala'	0.00859127	0.0934881	0	3	2	4	1
'ibcoa'	0.00843254	0.163934	0	2	1	2	1
'mmpe'	0.00815476	0.145833	0	2	1	3.5	1
'leu'	0.0077381	0.0862069	0	3	2	4	1
'gly'	0.00761905	0.0875075	0	3	1	4.33333	2
'carblasp'	0.00757937	0.0782515	0	3	2	3.33333	1
'macoa'	0.00736111	0.186275	0	2	1	2	1
'fecostr'	0.00722222	0.4	0	2	1	2	1
'dimpe'	0.00688492	0.159091	0	2	1	2.5	1
'4mop'	0.0068254	0.090566	0	2	1	2.5	1
'pep'	0.00638062	0.094217	0	2	1	3.5	1
'3hibcoa'	0.00625	0.216867	0	2	1	2	1
'prpp'	0.00595238	0.666667	0	4	2	3	2
'3mbutdhla'	0.00587302	0.0954357	0	2	1	2	1
'amlplprot'	0.00585317	0.0631891	0.166667	3	1	2	2
'carbp'	0.00583333	0.0730111	0	2	1	2.5	1
'l-kyn'	0.00583333	0.0870588	0	3	1	2.33333	2
'put'	0.00579365	0.080308	0	2	1	2.5	1
'pc'	0.00561508	0.175	0	3	1	2.33333	2
'epistr'	0.00547619	0.5	0	2	1	2	1
'3hib'	0.00509921	0.261538	0	2	1	2	1
'ivcoa'	0.00488095	0.100917	0	2	1	2	1
'2pga'	0.00485284	0.0867744	0	2	1	2.5	1
'gln'	0.00430556	0.0684285	0	2	1	5.5	1
'1g3pc'	0.00428571	0.182609	0	3	1	3.33333	2
'1g3pe'	0.0039881	0.169355	0	3	1	4	2
'mmsald'	0.00390873	0.333333	0	2	1	2	1
'3mb2coa'	0.00384921	0.107143	0	2	1	2	1
'ergsttr'	0.00369048	0.666667	0	2	1	2	1
'cdpdag'	0.0034127	1	0	3	1	2.66667	2
'b-D-glc6p'	0.0031746	0.0983405	0	3	1	2.33333	2
'nflk'	0.00295635	0.0811547	0	3	1	2	2
'g3pc'	0.00293651	0.194444	0	3	1	3	2
'lplprot'	0.00293651	0.059481	0.5	2	1	2.5	1
'orn'	0.00291667	0.0748092	0	2	1	2	1
'thf'	0.00285714	0.666667	0	3	2	2.33333	1
'3mgcoa'	0.00277778	0.114286	0	2	1	3	1
'mmalonat'	0.00267857	0.46875	0	2	1	7.5	1
'g3pe'	0.00263889	0.184211	0	3	1	3	2
'adesuc'	0.00263889	0.0800878	0	2	1	4.5	1
'ergsttet'	0.00186508	1	0	2	1	1.5	1
'eictrcoa'	0.0018254	0.5	0	3	2	6	1
'mag'	0.00178571	0.287671	0.166667	4	1	4	3
'dcopcoa'	0.00172619	1	0.166667	3	2	5.66667	1
'dcotcoa'	0.00170635	1	0	3	2	5.33333	1
'dgdp'	0.00154762	1	0	3	2	2.66667	1
'dadp'	0.00154762	1	0	3	2	2.66667	1
'ump'	0.00150794	1	0	5	4	1.8	1
'thfglu'	0.00144841	1	0	2	1	2	1
'tyr'	0.00140873	1	0.166667	3	2	4.33333	1
'L-lactald'	0.00136905	1	0	2	1	2.5	1
'1pl5c'	0.00136905	1	0	2	1	5	1
'ribl5p'	0.00079365	0.4	0	3	1	2.66667	2
'gl6p'	0.00065476	0.305556	0	2	1	2.5	1
'r5p'	0.00054563	0.5	0	3	1	3.66667	2
'glincoa'	0.00053571	0.36	0	3	1	2.33333	2
'g15l6p'	0.00047619	0.25	0	2	1	2.5	1
'cdpe'	0.00043651	0.196429	0	2	1	3	1
'a-lincoa'	0.00039683	0.285714	0	2	1	2.5	1
'stdcoa'	0.00031746	0.4	0	2	1	2.5	1
'man6p'	0.00029762	0.5	0	3	2	2.33333	1
'eictcoa'	0.00029762	0.5	0	2	1	2.5	1
'geranylpp'	0.00025794	0.156627	0.333333	3	2	3	1
'xyl5p'	0.00024802	0.75	0.166667	3	1	3.66667	2
'man1p'	0.0002381	0.666667	0	2	1	2.5	1
'dccoa'	0.0002381	0.4	0.333333	3	2	6.33333	1
'ddcoa'	0.0002381	0.5	0.333333	3	2	6.33333	1
'eicpcoa'	0.0002381	0.666667	0.166667	3	2	6	1
'lincoa'	0.00021825	0.23913	0	2	1	1.5	1
'occoa'	0.00019841	0.333333	0.333333	3	2	6.33333	1
'acdcoa'	0.00019841	0.666667	0	2	1	3	1
'tdcoa'	0.00019841	0.666667	0.333333	3	2	6.33333	1
'xmp'	0.00019841	0.75	0.0833333	4	2	2.25	2
'imp'	0.00017857	0.6	0.166667	3	2	2.66667	1
'glycerol'	0.00015873	0.172131	0	2	1	4	1
'amp'	0.00015873	0.5	0.166667	3	2	3.33333	1
'gdpman'	0.00013889	1	0	2	1	1.5	1
'f6p'	0.00013889	1	0.166667	4	2	2.5	2
'hxcoa'	0.00011905	0.285714	0.166667	3	2	5.66667	1
'pmtcoa'	0.00011905	1	0.333333	3	2	6	1
'adp'	0.00011905	0.461538	0	3	1	2.33333	2
'fol'	0.00011905	0.5	0	2	1	2.5	1
'dhf'	7.937e-05	0.4	0	2	1	1.5	1
'hser'	7.937e-05	0.666667	0	2	1	2	1
'cdp'	5.952e-05	0.75	0	3	1	1.66667	2
'gdp'	5.952e-05	0.75	0	3	1	2	2
'anthra'	5.952e-05	1	0	2	1	2	1
'aspsa'	5.952e-05	0.5	0	2	1	3.5	1
'phser'	5.952e-05	1	0	2	1	2.5	1
'uridine'	3.968e-05	0.666667	0	2	1	3.5	1
'dcdp'	3.968e-05	1	0	2	1	2	1
'dudp'	3.968e-05	0.666667	0	2	1	3	1
'phe'	3.968e-05	0.666667	0.166667	3	2	4.33333	1
'dhlplprot'	1.984e-05	0.056184	0.5	2	1	2.5	1
'b-D-glc'	0	0.0900447	0	1	0	3	1
'mannan'	0	0	0	1	1	2	0
'oaa'	0	0	0	3	3	5.33333	0
'sdhpt7p'	0	0	0.166667	4	4	3	0
'erth4p'	0	0.75	0.5	2	0	4	2
'f16p'	0	0	0	1	1	4	0
'ac'	0	0	0	2	2	6	0
mannose'	0	0.4	0	1	0	3	1
fructose'	0	0.0931373	0	1	0	4	1
'btcoa'	0	0.25	0	1	0	3	1
'dc4pcoa'	0	0	0	1	1	3	0
'dchxcoa'	0	0	0	1	1	3	0
'strcoa'	0	0	0.5	2	2	8	0
'olcoa'	0	0.206897	0	1	0	2	1
'dmpp'	0	0.14433	0.5	2	1	3.5	1
'acacylcoa'	0	0.114286	0	1	0	4	1
'ergstr'	0	0	0	1	1	2	0
'formate'	0	0	0	2	2	3	0
'clpn'	0	0	0	2	2	2	0
'pg'	0	1	0	1	0	2	1
'acylcoa'	0	0.297297	0.5	3	0	4.33333	3
'mino'	0	1	0	1	0	2	1
'ptd1ino'	0	0	0	2	2	2	0
'fa(pmtacid)'	0	0	0.166667	4	4	3.75	0
'tgr'	0	0	0	1	1	6	0
'peth'	0	0.17037	0	1	0	2	1
'ethan'	0	0	0	1	1	3	0
'carboxylate'	0	0	0	2	2	4	0
'chol'	0	0	0	1	1	3	0
'cytidine'	0	0.571429	0	2	0	2	2
'hxan'	0	0.444444	0	1	0	3	1
'xan'	0	0.5	0	1	0	4	1
'asp'	0	0.0814895	0	5	0	2.2	5
'cmp'	0	0	0	2	2	2.5	0
'ctp'	0	0.5	0	1	0	3	1
'gmp'	0	0	0	2	2	3.5	0
'dgmp'	0	0	0	1	1	3	0
'damp'	0	0	0	1	1	3	0
'dcmp'	0	0	0	1	1	2	0
'dtmp'	0	0	0	1	1	5	0
'gtp'	0	0.5	0	1	0	3	1
'atp'	0	0.35	0	1	0	3	1
'udp'	0	0.666667	0	1	0	5	1
'dutp'	0	0.5	0	1	0	2	1
'arg'	0	0.0704825	0	2	0	1.5	2
'urea'	0	0	0	1	1	2	0
'ts2'	0	0.0940116	0	1	0	4	1
'L-lac'	0	0	0	1	1	2	0
'pro'	0	0	0	1	1	2	0
'acald'	0	1	0	1	0	3	1
'thr'	0	0	0	3	3	2	0
'asn'	0	0	0	1	1	5	0
'trp'	0	0.0755287	0	1	0	3	1
'dhpt'	0	0.333333	0	1	0	2	1
'thfpolyglu'	0	0	0	1	1	2	0
'phepyr'	0	0.5	0	1	0	3	1
'34hpp'	0	0	0	1	1	3	0
'4m2opent'	0	0.0822785	0	1	0	3	1
'2oivlrt'	0	0.113208	0	1	0	3	1
'3m2opent'	0	0.0622601	0	1	0	3	1
'ppcoa'	0	0	0	1	1	3	0
'3mercpyr'	0	0	0	1	1	5	0
'42aphdob'	0	0	0	1	1	2	0

## Sheet: Forman_coeff_MasterModel
		IN FORMAN									OUT FORMAN
		total Weight for In Forman	In coeff								total Weight for Out Forman	out coeff								Total flow through the node v		Total flow through the node v
ev1v2		wt	v1	v2	FI(e)	v	FI(v) unnormalized		Indegree (Cytoscape)	Forman-Ricci_Fi(v) normalized	wt	v1	v2	FO(e)	v	Fo(v) unnormalized		Outdegree Cytoscape)	Forman-Ricci_Fo(v) normalized	FI/O(v) (Fi-Fo) unnormalized		FI/O(v) (FRi-FRo) normalized
(b-D-glc,)	b-D-glc6p	2	1	1	-0.828427	'b-D-glc'	0		0	0	4	1	3	-1.4641	'b-D-glc'	0		1	0	0		0
b-D-glc6p,	b-D-fr6P	4	2	2	-1.65685	'prpp'	-2.36308		2	-1.18154	5	2	3	-2.03526	'prpp'	-4.07052		2	-2.03526	1.70744		0.85372
b-D-glc6p,	g15l6p	3	2	1	-1.18154	'r5p'	-1.18154		1	-1.18154	4	2	2	-1.65685	'r5p'	-2.03526		2	-1.01763	0.85372		-0.16391
b-D-fr6P	b-D-fr16P	4	3	1	-1.4641	'gdpman'	-1.18154		1	-1.18154	5	2	3	-2.03526	'gdpman'	-1.18154		1	-1.18154	0		0
fructose	b-D-fr6P	3	1	2	-1.18154	'man1p'	-1.4641		1	-1.4641	4	1	3	-1.4641	'man1p'	-1.18154		1	-1.18154	-0.282561		-0.282561
b-D-fr6P	man6p	5	2	3	-2.03526	'man6p'	-2.03526		2	-1.01763	3	1	2	-1.18154	'man6p'	-1.18154		1	-1.18154	-0.85372		0.16391
mannose	man6p	3	1	2	-1.18154	'b-D-fr6p'	-2.83839		2	-1.4192	3	1	2	-1.18154	'b-D-fr6p'	-3.49936		2	-1.74968	0.660968		0.330484
man6p	man1p	4	3	1	-1.4641	'b-D-glc6p'	-0.828427		1	-0.828427	3	1	2	-1.18154	'b-D-glc6p'	-1.4641		2	-0.732051	0.635674		-0.0963763
man1p	gdpman	3	2	1	-1.18154	'mannan'	-1.18154		1	-1.18154	3	1	2	-1.18154	'mannan'	-0.828427		0	0	-0.353113		-1.18154
gdpman	mannan	3	2	1	-1.18154	'b-D-fr16p'	-1.4641		1	-1.4641	2	1	1	-0.828427	'b-D-fr16p'	-2.03526		2	-1.01763	0.571159		-0.446471
b-D-fr16P	ga3p	3	2	1	-1.18154	'dhap'	-3.54462		2	-1.77231	5	2	3	-2.03526	'dhap'	-3.49936		2	-1.74968	-0.045259		-0.0226295
b-D-fr16P	dhap	3	2	1	-1.18154	'ga3p'	-3.54462		2	-1.77231	5	2	3	-2.03526	'ga3p'	-4.07052		2	-2.03526	0.5259		0.26295
dhap	g3p	8	3	5	-3.22353	'suc'	-1.18154		1	-1.18154	4	2	2	-1.65685	'suc'	-1.65685		3	-0.552285	0.475314		-0.629256
ga3p	bpg	4	3	1	-1.4641	'bpg'	-1.4641		1	-1.4641	3	1	2	-1.18154	'bpg'	-1.18154		1	-1.18154	-0.282561		-0.282561
bpg	3pga	3	2	1	-1.18154	'fum'	-3.2168		3	-1.07227	4	1	3	-1.4641	'fum'	-2.48528		1	-2.48528	-0.73152		1.41301
3pga	2pga	3	2	1	-1.18154	'3pga'	-1.18154		1	-1.18154	4	2	2	-1.65685	'3pga'	-1.4641		2	-0.732051	0.282561		-0.44949
2pga	pep	3	2	1	-1.18154	'mal'	-3.69212		1	-3.69212	4	1	3	-1.4641	'mal'	-2.36308		2	-1.18154	-1.32903		-2.51057
pep	pyr	8	2	6	-2.9282	'2pga'	-1.18154		1	-1.18154	5	2	3	-2.03526	'2pga'	-1.65685		1	-1.65685	0.475314		0.475314
pyr	acoa	8	7	1	-2.31174	'oaa'	-3.31371		3	-1.10457	9	2	7	-3.17989	'oaa'	-5.21516		0	0	1.90145		-1.10457
acoa	ac	4	2	2	-1.65685	'pep'	-1.18154		1	-1.18154	8	7	1	-2.31174	'pep'	-1.4641		1	-1.4641	0.282561		0.282561
acoa	cit	3	2	1	-1.18154	'pyr'	-16.1731		4	-4.04326	9	7	2	-3.17989	'pyr'	-11.2828		2	-5.64139	-4.89028		1.59813
acoa	oaa	4	2	2	-1.65685	'acoa'	-2.31174		2	-1.15587	9	7	2	-3.17989	'acoa'	-3.17989		6	-0.529982	0.868153		-0.625889
pep	oaa	4	2	2	-1.65685	'succoa'	-1.18154		1	-1.18154	5	3	2	-2.03526	'succoa'	-1.65685		1	-1.65685	0.475314		0.475314
oaa	mal	5	3	2	-2.03526	'isocit'	-1.18154		1	-1.18154	3	1	2	-1.18154	'isocit'	-1.18154		1	-1.18154	0		0
mal	pyr	5	3	2	-2.03526	'cisaco'	-1.18154		1	-1.18154	4	1	3	-1.4641	'cisaco'	-1.18154		1	-1.18154	0		0
cit	cisaco	3	2	1	-1.18154	'cit'	-1.18154		1	-1.18154	3	1	2	-1.18154	'cit'	-3.17989		1	-3.17989	1.99835		1.99835
cisaco	isocit	3	2	1	-1.18154	'g15l6p'	-1.18154		1	-1.18154	3	1	2	-1.18154	'g15l6p'	-1.65685		1	-1.65685	0.475314		0.475314
isocit	akg	4	2	2	-1.65685	'gl6p'	-1.18154		1	-1.18154	4	1	3	-1.4641	'gl6p'	-1.18154		1	-1.18154	0		0
akg	succoa	3	2	1	-1.18154	'ribl5p'	-1.18154		1	-1.18154	4	2	2	-1.65685	'ribl5p'	-1.4641		2	-0.732051	0.282561		-0.44949
succoa	suc	3	2	1	-1.18154	'sdhpt7p'	-8.46069		4	-2.11517	5	1	4	-1.7082	'sdhpt7p'	-3.54462		0	0	-4.91607		-2.11517
suc	ac	4	2	2	-1.65685	'erth4p'	0		0	0	3	2	1	-1.18154	'erth4p'	0		2	0	0		0
suc	fum	3	2	1	-1.18154	'xyl5p'	-1.18154		1	-1.18154	4	2	2	-1.65685	'xyl5p'	-2.03526		2	-1.01763	0.85372		-0.16391
fum	mal	4	2	2	-1.65685	'f6p'	-2.83839		2	-1.4192	3	1	2	-1.18154	'f6p'	-4.52054		2	-2.26027	1.68215		0.841074
g15l6p	gl6p	3	2	1	-1.18154	'f16p'	-1.4641		1	-1.4641	3	1	2	-1.18154	'f16p'	-1.18154		0	0	-0.282561		-1.4641
gl6p	ribl5p	3	2	1	-1.18154	'g3p'	-9.65714		4	-2.41428	4	1	3	-1.4641	'g3p'	-5.95935		1	-5.95935	-3.69779		3.54507
ribl5p	r5p	3	2	1	-1.18154	'akg'	-3.31371		2	-1.65685	5	2	3	-2.03526	'akg'	-3.49936		2	-1.74968	0.185654		0.0928271
r5p	prpp	3	2	1	-1.18154	'ac'	-1.65685		2	-0.828427	5	2	3	-2.03526	'ac'	-1.18154		0	0	-0.475314		-0.828427
ribl5p	xyl5p	3	2	1	-1.18154	mannose'	0		0	0	5	2	3	-2.03526	mannose'	0		1	0	0		0
r5p	sdhpt7p	6	2	4	-2.36308	fructose'	0		0	0	3	2	1	-1.18154	fructose'	0		1	0	0		0
xyl5p	sdhpt7p	7	3	4	-2.87408	'btcoa'	0		0	0	3	2	1	-1.18154	'btcoa'	0		1	0	0		0
xyl5p	f6p	4	2	2	-1.65685	'occoa'	-3.69212		2	-1.84606	5	2	3	-2.03526	'occoa'	-4.13477		1	-4.13477	0.442652		2.28871
f6p	f16p	4	3	1	-1.4641	'hxcoa'	-2.83839		2	-1.4192	3	2	1	-1.18154	'hxcoa'	-4.13477		1	-4.13477	1.29637		2.71557
f6p	sdhpt7p	8	3	5	-3.22353	'dccoa'	-3.69212		2	-1.84606	3	2	1	-1.18154	'dccoa'	-4.13477		1	-4.13477	0.442652		2.28871
erth4p	f6p	3	1	2	-1.18154	'ddcoa'	-3.69212		2	-1.84606	6	3	3	-2.48528	'ddcoa'	-4.13477		1	-4.13477	0.442652		2.28871
erth4p	sdpth7p	5	1	4	-1.7082	'stdcoa'	-1.18154		1	-1.18154	2	1	1	-0.828427	'stdcoa'	-1.65685		1	-1.65685	0.475314		0.475314
cys	pyr	10	3	7	-3.84383	'eictrcoa'	-2.83839		2	-1.4192	7	4	3	-2.87408	'eictrcoa'	-4.61008		1	-4.61008	1.77169		3.19088
cysthione	pyr	8	2	6	-2.9282	'dcotcoa'	-3.31371		2	-1.65685	5	2	3	-2.03526	'dcotcoa'	-4.13477		1	-4.13477	0.821059		2.47791
ala	pyr	9	3	6	-3.54462	'eicpcoa'	-1.4641		2	-0.732051	4	1	3	-1.4641	'eicpcoa'	-1.18154		1	-1.18154	-0.282561		0.44949
acoa	malcoa	4	2	2	-1.65685	'eictcoa'	-3.12096		1	-3.12096	14	6	12	-4.12663	'eictcoa'	-4.13477		1	-4.13477	1.01381		1.01381
malcoa	hxcoa	4	2	2	-1.65685	'dc4pcoa'	-1.4641		1	-1.4641	12	11	1	-2.95323	'dc4pcoa'	-0.828427		0	0	-0.635674		-1.4641
btcoa	hxcoa	3	1	2	-1.18154	'dcopcoa'	-3.31371		2	-1.65685	3	1	2	-1.18154	'dcopcoa'	-4.13477		1	-4.13477	0.821059		2.47791
hxcoa	occoa	5	3	2	-2.03526	'dchxcoa'	-1.4641		1	-1.4641	3	1	2	-1.18154	'dchxcoa'	-0.828427		0	0	-0.635674		-1.4641
malcoa	occoa	4	2	2	-1.65685	'acdcoa'	-1.4641		1	-1.4641	12	11	1	-2.95323	'acdcoa'	-1.18154		1	-1.18154	-0.282561		-0.282561
occoa	dccoa	5	3	2	-2.03526	'malcoa'	-1.65685		2	-0.828427	3	1	2	-1.18154	'malcoa'	-4.12663		11	-0.375148	2.46978		-0.453279
malcoa	dccoa	4	2	2	-1.65685	'strcoa'	-3.69212		2	-1.84606	12	11	1	-2.95323	'strcoa'	-4.13477		0	0	0.442652		-1.84606
dccoa	ddcoa	5	3	2	-2.03526	'pmtcoa'	-3.69212		2	-1.84606	3	1	2	-1.18154	'pmtcoa'	-4.13477		1	-4.13477	0.442652		2.28871
malcoa	ddcoa	4	2	2	-1.65685	'tdcoa'	-3.69212		2	-1.84606	12	11	1	-2.95323	'tdcoa'	-4.13477		1	-4.13477	0.442652		2.28871
ddcoa	tdcoa	5	3	2	-2.03526	'lincoa'	-1.18154		1	-1.18154	3	1	2	-1.18154	'lincoa'	-1.18154		1	-1.18154	0		0
malcoa	tdcoa	4	2	2	-1.65685	'olcoa'	-1.4641		0	0	12	11	1	-2.95323	'olcoa'	-1.18154		1	-1.18154	-0.282561		1.18154
tdcoa	pmtcoa	5	3	2	-2.03526	'glincoa'	-1.18154		1	-1.18154	3	1	2	-1.18154	'glincoa'	-1.4641		2	-0.732051	0.282561		-0.44949
malcoa	pmtcoa	4	2	2	-1.65685	'a-lincoa'	-1.18154		1	-1.18154	12	11	1	-2.95323	'a-lincoa'	-1.18154		1	-1.18154	0		0
pmtcoa	strcoa	5	3	2	-2.03526	'hmgcoa'	-5.53462		3	-1.84487	3	1	2	-1.18154	'hmgcoa'	-5.02082		1	-5.02082	-0.513805		3.17594
malcoa	strcoa	4	2	2	-1.65685	'mev5p'	-1.18154		1	-1.18154	12	11	1	-2.95323	'mev5p'	-1.18154		1	-1.18154	0		0
strcoa	olcoa	4	3	1	-1.4641	'ipdp'	-1.18154		1	-1.18154	3	1	2	-1.18154	'ipdp'	-1.7082		3	-0.569401	0.526663		-0.612139
olcoa	lincoa	3	2	1	-1.18154	'dmpp'	-1.18154		1	-1.18154	3	1	2	-1.18154	'dmpp'	-2.03526		1	-2.03526	0.85372		0.85372
lincoa	a-lincoa	3	2	1	-1.18154	'geranylpp'	-3.31371		2	-1.65685	3	1	2	-1.18154	'geranylpp'	-3.2168		1	-3.2168	-0.0969069		1.55995
a-lincoa	g-lincoa	3	2	1	-1.18154	'farnasylpp'	-3.69212		2	-1.84606	4	1	3	-1.4641	'farnasylpp'	-3.2168		1	-3.2168	-0.475314		1.37074
g-lincoa	stdcoa	3	2	1	-1.18154	'sql'	-1.4641		1	-1.4641	4	2	2	-1.65685	'sql'	-1.18154		1	-1.18154	-0.282561		-0.282561
stdcoa	eictcoa	4	2	2	-1.65685	'lanostr'	-1.18154		1	-1.18154	3	1	2	-1.18154	'lanostr'	-1.4641		2	-0.732051	0.282561		-0.44949
malcoa	eictcoa	4	3	1	-1.4641	'44mctr'	-1.18154		1	-1.18154	12	11	1	-2.95323	'44mctr'	-1.65685		1	-1.65685	0.475314		0.475314
eictcoa	eicpcoa	4	3	1	-1.4641	'14dmls'	-1.18154		1	-1.18154	3	1	2	-1.18154	'14dmls'	-1.18154		1	-1.18154	0		0
eicpcoa	dcopcoa	4	2	2	-1.65685	'ergsttr'	-1.18154		1	-1.18154	3	1	2	-1.18154	'ergsttr'	-1.18154		1	-1.18154	0		0
malcoa	dcopcoa	4	2	2	-1.65685	'3mgcoa'	-1.18154		1	-1.18154	12	11	1	-2.95323	'3mgcoa'	-1.18154		1	-1.18154	0		0
dcopocoa	dchxcoa	4	3	1	-1.4641	'acacylcoa'	0		0	0	2	1	1	-0.828427	'acacylcoa'	0		1	0	0		0
g-lincoa	eictrcoa	3	2	1	-1.18154	'mev'	-1.7082		1	-1.7082	4	2	2	-1.65685	'mev'	-1.18154		1	-1.18154	-0.526663		-0.526663
eictrcoa	acdcoa	4	3	1	-1.4641	'mev5pp'	-1.18154		1	-1.18154	3	1	2	-1.18154	'mev5pp'	-0.732051		1	-0.732051	-0.44949		-0.44949
malcoa	eictrcoa	4	2	2	-1.65685	'fecostr'	-1.18154		1	-1.18154	12	11	1	-2.95323	'fecostr'	-1.18154		1	-1.18154	0		0
acdcoa	dcotcoa	4	2	2	-1.65685	'ergsttet'	-1.18154		1	-1.18154	3	1	2	-1.18154	'ergsttet'	-1.18154		1	-1.18154	0		0
malcoa	dcotcoa	4	2	2	-1.65685	'ergstr'	-1.18154		1	-1.18154	12	11	1	-2.95323	'ergstr'	-1.18154		0	0	0		-1.18154
dcotcoa	dc4pcoa	4	3	1	-1.4641	'sql23epx'	-1.18154		1	-1.18154	2	1	1	-0.828427	'sql23epx'	-1.18154		1	-1.18154	0		0
3mgcoa	hmgcoa	5	2	3	-2.03526	'epistr'	-1.18154		1	-1.18154	3	1	2	-1.18154	'epistr'	-1.18154		1	-1.18154	0		0
acoa	hmgcoa	5	2	3	-2.03526	'formate'	-3.31371		2	-1.65685	7	5	2	-2.65774	'formate'	-2.00997		0	0	-1.30374		-1.65685
acacylcoa	hmgcoa	4	1	3	-1.4641	'zym'	-1.18154		1	-1.18154	3	1	2	-1.18154	'zym'	-1.18154		1	-1.18154	0		0
hmgcoa	mev	5	4	1	-1.7082	'glycerol'	-1.18154		1	-1.18154	3	1	2	-1.18154	'glycerol'	-2.03526		1	-2.03526	0.85372		0.85372
mev	mev5p	3	2	1	-1.18154	'clpn'	-2.83839		2	-1.4192	3	1	2	-1.18154	'clpn'	-2.65685		0	0	-0.181541		-1.4192
mev5p	mev5pp	3	2	1	-1.18154	'1ag3p'	-3.83928		2	-1.91964	3	1	3	-0.732051	'1ag3p'	-3.2168		1	-3.2168	-0.622476		1.29716
mev5pp	ipdp	3	2	1	-1.18154	'pg'	0		0	0	5	1	4	-1.7082	'pg'	0		1	0	0		0
ipdp	dmpp	3	2	1	-1.18154	'acylcoa'	0		0	0	5	3	2	-2.03526	'acylcoa'	0		3	0	0		0
ipdp	geranylpp	4	2	2	-1.65685	'mino'	0		0	0	5	3	2	-2.03526	'mino'	0		1	0	0		0
ipdp	farnasylpp	4	2	2	-1.65685	'cdpdag'	-2.36308		1	-2.36308	5	3	2	-2.03526	'cdpdag'	-1.65685		2	-0.828427	-0.706227		-1.53465
dmpp	geranylpp	4	2	2	-1.65685	'pa'	-6.09088		3	-2.03029	3	1	2	-1.18154	'pa'	-7.17292		2	-3.58646	1.08204		1.55617
geranylpp	farnasylpp	5	3	2	-2.03526	'ptd1ino'	-2.83839		2	-1.4192	3	1	2	-1.18154	'ptd1ino'	-2.00997		0	0	-0.828427		-1.4192
farnasylpp	sql	4	3	1	-1.4641	'mag'	-1.7082		1	-1.7082	3	1	2	-1.18154	'mag'	-3.7082		3	-1.23607	2		-0.472136
sql	sql23epx	3	2	1	-1.18154	'12dgr'	-4.33818		3	-1.44606	3	1	2	-1.18154	'12dgr'	-5.88127		5	-1.17625	1.54309		-0.269806
sql23epx	lanostr	3	2	1	-1.18154	'fa(pmtacid)'	-10.403		4	-2.60074	4	1	3	-1.4641	'fa(pmtacid)'	-5.7539		0	0	-4.64905		-2.60074
lanostr	44mctr	3	2	1	-1.18154	'tgr'	-1.7082		1	-1.7082	4	2	2	-1.65685	'tgr'	-1.92672		0	0	0.218511		-1.7082
lanostr	formate	4	2	2	-1.65685	'cdpe'	-0.828427		1	-0.828427	3	2	1	-1.18154	'cdpe'	-0.828427		1	-0.828427	0		0
44mctr	14dmls	3	2	1	-1.18154	'peth'	0		0	0	3	1	2	-1.18154	'peth'	0		1	0	0		0
14mdls	zym	3	2	1	-1.18154	'pe'	-4.01994		2	-2.00997	3	1	2	-1.18154	'pe'	-5.41641		3	-1.80547	1.39647		-0.204498
zym	fecostr	3	2	1	-1.18154	'1g3pe'	-1.4641		1	-1.4641	3	1	2	-1.18154	'1g3pe'	-2.03526		2	-1.01763	0.571159		-0.446471
fecostr	epistr	3	2	1	-1.18154	'g3pe'	-1.18154		1	-1.18154	3	1	2	-1.18154	'g3pe'	-1.65685		2	-0.828427	0.475314		-0.353113
epistr	ergsttr	3	2	1	-1.18154	'ethan'	-1.18154		1	-1.18154	3	1	2	-1.18154	'ethan'	-0.828427		0	0	-0.353113		-1.18154
ergsttr	ergsttet	3	2	1	-1.18154	'carboxylate'	-3.69212		2	-1.84606	3	1	2	-1.18154	'carboxylate'	-2.64564		0	0	-1.04647		-1.84606
ergsttet	ergstr	3	2	1	-1.18154	'mmpe'	-1.4641		1	-1.4641	2	1	1	-0.828427	'mmpe'	-2.03526		1	-2.03526	0.571159		0.571159
g3p	1ag3p	7	5	2	-2.65774	'1g3pc'	-1.18154		1	-1.18154	3	1	2	-1.18154	'1g3pc'	-2.03526		2	-1.01763	0.85372		-0.16391
1ag3p	pa	5	3	2	-2.03526	'pc'	-1.18154		1	-1.18154	4	1	3	-1.4641	'pc'	-1.4641		2	-0.732051	0.282561		-0.44949
acylcoa	1ag3p	3	1	2	-1.18154	'dimpe'	-1.18154		1	-1.18154	5	3	2	-2.03526	'dimpe'	-1.18154		1	-1.18154	0		0
acylcoa	pa	3	1	2	-1.18154	'g3pc'	-1.18154		1	-1.18154	6	3	3	-2.48528	'g3pc'	-2.03526		2	-1.01763	0.85372		-0.16391
pa	12dgr	7	4	3	-2.87408	'chol'	-1.4641		1	-1.4641	7	2	5	-2.65774	'chol'	-1.18154		0	0	-0.282561		-1.4641
acylcoa	12dgr	4	1	3	-1.4641	'carbp'	-1.18154		1	-1.18154	8	3	5	-3.22353	'carbp'	-1.18154		1	-1.18154	0		0
12dgr	pa	7	4	3	-2.87408	'carblasp'	-3.2168		2	-1.6084	8	5	3	-3.22353	'carblasp'	-3.2168		1	-3.2168	0		1.6084
pa	cdpdag	6	4	2	-2.36308	'dhort'	-1.18154		1	-1.18154	4	2	2	-1.65685	'dhort'	-1.18154		2	-0.59077	0		-0.59077
cdpdag	clpn	4	2	2	-1.65685	'ort'	-2.83839		2	-1.4192	4	2	1	-1.82843	'ort'	-3.69212		1	-3.69212	0.85372		2.27292
pg	clpn	3	1	2	-1.18154	'ortdn5p'	-1.4641		1	-1.4641	2	1	1	-0.828427	'ortdn5p'	-1.4641		2	-0.732051	0		-0.732051
cdpdag	ptd1ino	4	2	2	-1.65685	'uridine'	-0.828427		1	-0.828427	3	2	1	-1.18154	'uridine'	-1.65685		1	-1.65685	0.828427		0.828427
mino	ptd1ino	3	1	2	-1.18154	'cytidine'	0		0	0	2	1	1	-0.828427	'cytidine'	0		2	0	0		0
mag	glycerol	3	2	1	-1.18154	'cdp'	-0.828427		1	-0.828427	5	3	2	-2.03526	'cdp'	-1.4641		2	-0.732051	0.635674		-0.0963763
mag	12dgr	5	2	3	-2.03526	'hxan'	0		0	0	8	3	5	-3.22353	'hxan'	0		1	0	0		0
mag	fa	6	2	4	-2.36308	'xan'	0		0	0	4	3	1	-1.4641	'xan'	0		1	0	0		0
12dgr	mag	5	1	4	-1.7082	'gln'	-1.18154		1	-1.18154	9	5	4	-3.7082	'gln'	-3.17989		1	-3.17989	1.99835		1.99835
12dgr	fa	8	4	4	-3.31371	'amp'	-4.01994		2	-2.00997	6	5	1	-1.92672	'amp'	-2.83839		1	-2.83839	-1.18154		0.828427
12dgr	tgr	5	4	1	-1.7082	'asp'	0		0	0	6	5	1	-1.92672	'asp'	0		5	0	0		0
12dgr	pe	6	4	2	-2.36308	'cmp'	-2.83839		2	-1.4192	9	5	4	-3.7082	'cmp'	-2.36308		0	0	-0.475314		-1.4192
cdpe	pe	4	2	2	-1.65685	'ctp'	0		0	0	5	1	4	-1.7082	'ctp'	0		1	0	0		0
peth	cdpe	2	1	1	-0.828427	'gmp'	-4.01994		2	-2.00997	2	1	1	-0.828427	'gmp'	-2.36308		0	0	-1.65685		-2.00997
pe	1g3pe	4	3	1	-1.4641	'dgmp'	-1.18154		1	-1.18154	5	2	3	-2.03526	'dgmp'	-0.828427		0	0	-0.353113		-1.18154
pe	carboxylate	5	3	2	-2.03526	'damp'	-1.18154		1	-1.18154	4	3	1	-1.4641	'damp'	-0.828427		0	0	-0.353113		-1.18154
1g3pe	g3pe	3	2	1	-1.18154	'dcmp'	-1.18154		1	-1.18154	4	2	2	-1.65685	'dcmp'	-0.828427		0	0	-0.353113		-1.18154
1g3pe	fa	6	2	4	-2.36308	'dtmp'	-1.92672		1	-1.92672	3	2	1	-1.18154	'dtmp'	-0.828427		0	0	-1.09829		-1.92672
g3pe	g3p	5	2	3	-2.03526	'gtp'	0		0	0	4	1	3	-1.4641	'gtp'	0		1	0	0		0
g3pe	ethan	3	2	1	-1.18154	'gdp'	-0.828427		1	-0.828427	2	1	1	-0.828427	'gdp'	-1.4641		2	-0.732051	0.635674		-0.0963763
pe	mmpe	4	3	1	-1.4641	'atp'	0		0	0	5	3	2	-2.03526	'atp'	0		1	0	0		0
mmpe	dimpe	3	2	1	-1.18154	'adp'	-0.828427		1	-0.828427	3	1	2	-1.18154	'adp'	-1.4641		2	-0.732051	0.635674		-0.0963763
dimpe	pc	3	2	1	-1.18154	'xmp'	-6.82346		2	-3.41173	4	1	3	-1.4641	'xmp'	-5.29128		2	-2.64564	-1.53218		-0.766088
pc	1g3pc	3	2	1	-1.18154	'dgdp'	-1.18154		2	-0.59077	5	2	3	-2.03526	'dgdp'	-1.65685		1	-1.65685	0.475314		1.06608
pc	carboxylate	4	2	2	-1.65685	'imp'	-6.43466		2	-3.21733	3	2	1	-1.18154	'imp'	-4.01994		1	-4.01994	-2.41473		0.802603
1g3pc	g3pc	3	2	1	-1.18154	'dadp'	-1.18154		2	-0.59077	5	2	3	-2.03526	'dadp'	-1.65685		1	-1.65685	0.475314		1.06608
1g3pc	fa	6	2	4	-2.36308	'udp'	0		0	0	3	2	1	-1.18154	'udp'	0		1	0	0		0
g3pc	g3p	5	2	3	-2.03526	'dcdp'	-1.18154		1	-1.18154	4	2	2	-1.65685	'dcdp'	-1.65685		1	-1.65685	0.475314		0.475314
g3pc	chol	4	3	1	-1.4641	'dudp'	-0.828427		1	-0.828427	3	2	1	-1.18154	'dudp'	-1.18154		1	-1.18154	0.353113		0.353113
atp	adp	2	1	1	-0.828427	'dutp'	0		0	0	4	1	3	-1.4641	'dutp'	0		1	0	0		0
adp	dadp	3	2	1	-1.18154	'ump'	-8.79745		4	-2.19936	4	2	2	-1.65685	'ump'	-5.20148		1	-5.20148	-3.59597		3.00211
dadp	damp	3	2	1	-1.18154	't[sh]2'	-11.2479		4	-2.81197	2	1	1	-0.828427	't[sh]2'	-6.50522		1	-6.50522	-4.74265		3.69325
adp	amp	4	2	2	-1.65685	'adomet'	-0.828427		1	-0.828427	3	2	1	-1.18154	'adomet'	-0.828427		1	-0.828427	0		0
amp	imp	6	3	3	-2.48528	'met'	-1.65685		2	-0.828427	3	1	2	-1.18154	'met'	-1.18154		1	-1.18154	-0.475314		0.353113
hxan	imp	4	1	3	-1.4641	'gly'	-1.65685		1	-1.65685	3	1	2	-1.18154	'gly'	-2.87408		2	-1.43704	1.21722		-0.219815
prpp	imp	6	3	3	-2.48528	'cys'	-3.69212		2	-1.84606	4	2	2	-1.65685	'cys'	-4.58228		3	-1.52743	0.890167		-0.31863
imp	xmp	7	4	3	-2.87408	'arg'	0		0	0	4	1	3	-1.4641	'arg'	0		2	0	0		0
xan	xmp	4	1	3	-1.4641	'orn'	-0.828427		1	-0.828427	4	1	3	-1.4641	'orn'	-1.65685		1	-1.65685	0.828427		0.828427
prpp	xmp	6	3	3	-2.48528	'urea'	-0.828427		1	-0.828427	6	2	4	-2.36308	'urea'	-1.18154		0	0	0.353113		-0.828427
xmp	amp	6	4	2	-2.36308	'adometam'	-1.18154		1	-1.18154	4	2	2	-1.65685	'adometam'	-2.36308		1	-2.36308	1.18154		1.18154
xmp	gmp	6	4	2	-2.36308	'put'	-1.18154		1	-1.18154	3	2	1	-1.18154	'put'	-1.18154		1	-1.18154	0		0
gdp	gmp	4	2	2	-1.65685	g-glucys'	-3.31371		2	-1.65685	3	2	1	-1.18154	g-glucys'	-2.83839		1	-2.83839	-0.475314		1.18154
gtp	gdp	2	1	1	-0.828427	'gsh'	-3.69212		3	-1.23071	4	1	3	-1.4641	'gsh'	-3.2168		2	-1.6084	-0.475314		0.377696
gdp	dgdp	3	2	1	-1.18154	'spd'	-3.31371		2	-1.65685	4	2	2	-1.65685	'spd'	-2.48528		1	-2.48528	-0.828427		0.828427
dgdp	dgmp	3	2	1	-1.18154	'gspd'	-4.07052		2	-2.03526	2	1	1	-0.828427	'gspd'	-4.52054		1	-4.52054	0.45002		2.48528
gln	carbp	3	2	1	-1.18154	'ts2'	0		0	0	3	1	2	-1.18154	'ts2'	0		1	0	0		0
carbp	carblasp	5	2	3	-2.03526	'glu'	-1.4641		1	-1.4641	3	1	2	-1.18154	'glu'	-3.41641		8	-0.427051	1.95231		-1.03705
asp	carblasp	3	1	2	-1.18154	'mg'	-7.45584		3	-2.48528	5	3	2	-2.03526	'mg'	-4.49525		4	-1.12381	-2.9606		-1.36147
carblasp	dhort	3	2	1	-1.18154	'hta'	-5.9077		2	-2.95385	3	1	2	-1.18154	'hta'	-3.31371		3	-1.10457	-2.59399		-1.84928
dhort	ort	4	2	2	-1.65685	'D-lacgsh'	-1.4641		1	-1.4641	4	2	2	-1.65685	'D-lacgsh'	-1.4641		1	-1.4641	0		0
suc	ort	3	1	2	-1.18154	'D-lac'	-1.65685		1	-1.65685	5	3	2	-2.03526	'D-lac'	-2.03526		1	-2.03526	0.378407		0.378407
dhort	fum	5	2	3	-2.03526	'L-lactald'	-1.7082		1	-1.7082	3	2	1	-1.18154	'L-lactald'	-2.87408		1	-2.87408	1.16587		1.16587
suc	fum	4	1	3	-1.4641	'L-lac'	-1.18154		1	-1.18154	4	3	1	-1.4641	'L-lac'	-1.18154		0	0	0		-1.18154
ort	ortdn5p	4	3	1	-1.4641	'ala'	-4.83675		2	-2.41837	4	1	3	-1.4641	'ala'	-3.31371		1	-3.31371	-1.52304		0.895334
ortdn5p	ump	6	2	4	-2.36308	'thf'	-2.83839		2	-1.4192	4	2	2	-1.65685	'thf'	-2.83839		1	-2.83839	0		1.4192
ortdn5p	prpp	3	2	1	-1.18154	'mthf'	-1.4641		1	-1.4641	5	2	3	-2.03526	'mthf'	-1.65685		1	-1.65685	0.192753		0.192753
ump	dtmp	6	5	1	-1.92672	'ser'	-1.18154		1	-1.18154	2	1	1	-0.828427	'ser'	-1.92672		4	-0.481679	0.745175		-0.699862
udp	ump	5	1	4	-1.7082	'pro'	-1.18154		1	-1.18154	3	1	2	-1.18154	'pro'	-0.828427		0	0	-0.353113		-1.18154
dudp	ump	6	2	4	-2.36308	'acald'	0		0	0	3	1	2	-1.18154	'acald'	0		1	0	0		0
dutp	dudp	2	1	1	-0.828427	'thr'	-3.73737		3	-1.24579	3	1	2	-1.18154	'thr'	-2.83839		0	0	-0.898979		-1.24579
uridine	ump	6	2	4	-2.36308	'asn'	-0.828427		1	-0.828427	3	1	2	-1.18154	'asn'	-1.7082		0	0	0.879777		-0.828427
cytidine	uridine	2	1	1	-0.828427	'trp'	0		0	0	4	2	2	-1.65685	'trp'	0		1	0	0		0
cytidine	cmp	3	1	2	-1.18154	'anthra'	-1.18154		1	-1.18154	3	2	1	-1.18154	'anthra'	-1.65685		1	-1.65685	0.475314		0.475314
cdp	cmp	4	2	2	-1.65685	'phe'	-1.18154		2	-0.59077	3	2	1	-1.18154	'phe'	-3.17989		1	-3.17989	1.99835		2.58912
ctp	cdp	2	1	1	-0.828427	'tyr'	-1.4641		2	-0.732051	4	1	3	-1.4641	'tyr'	-1.18154		1	-1.18154	-0.282561		0.44949
cdp	dcdp	3	2	1	-1.18154	'fol'	-1.18154		1	-1.18154	4	2	2	-1.65685	'fol'	-1.18154		1	-1.18154	0		0
dcdp	dcmp	3	2	1	-1.18154	'dhf'	-0.828427		1	-0.828427	2	1	1	-0.828427	'dhf'	-1.18154		1	-1.18154	0.353113		0.353113
dhap	mg	6	3	3	-2.48528	'dhpt'	0		0	0	4	2	2	-1.65685	'dhpt'	0		1	0	0		0
ga3p	mg	6	3	3	-2.48528	'thfglu'	-1.4641		1	-1.4641	4	2	2	-1.65685	'thfglu'	-1.18154		1	-1.18154	-0.282561		-0.282561
mg	dhap	6	4	2	-2.36308	'thfpolyglu'	-1.18154		1	-1.18154	4	1	3	-1.4641	'thfpolyglu'	-0.828427		0	0	-0.353113		-1.18154
mg	ga3p	6	4	2	-2.36308	'3phpyr'	-1.18154		1	-1.18154	5	2	3	-2.03526	'3phpyr'	-2.03526		2	-1.01763	0.85372		-0.16391
mg	hta	6	4	2	-2.36308	'3pser'	-1.18154		1	-1.18154	4	2	2	-1.65685	'3pser'	-1.65685		1	-1.65685	0.475314		0.475314
t[sh]2	hta	9	6	3	-3.54462	'oacser'	-1.65685		2	-0.828427	4	2	2	-1.65685	'oacser'	-2.36308		1	-2.36308	0.706227		1.53465
hta	D-lacgsh	4	3	1	-1.4641	'aspsa'	-0.828427		1	-0.828427	4	1	3	-1.4641	'aspsa'	-2.36308		1	-2.36308	1.53465		1.53465
D-lacgsh	D-lac	4	2	2	-1.65685	'hser'	-1.18154		1	-1.18154	5	2	3	-2.03526	'hser'	-1.18154		1	-1.18154	0		0
D-lac	pyr	8	2	6	-2.9282	'phser'	-1.18154		1	-1.18154	7	4	3	-2.87408	'phser'	-1.18154		1	-1.18154	0		0
mg	L-lactald	5	4	1	-1.7082	'1pl5c'	-1.18154		1	-1.18154	7	4	3	-2.87408	'1pl5c'	-3.17989		1	-3.17989	1.99835		1.99835
L-lactald	L-lac	3	2	1	-1.18154	'cysthion'	-1.18154		1	-1.18154	3	1	2	-1.18154	'cysthion'	-2.87408		1	-2.87408	1.69254		1.69254
hta	t[sh]2	7	3	4	-2.87408	'hcys'	-1.18154		1	-1.18154	3	1	2	-1.18154	'hcys'	-2.03526		2	-1.01763	0.85372		-0.16391
ts2	t[sh]2	6	1	5	-1.92672	'phepyr'	0		0	0	3	1	2	-1.18154	'phepyr'	0		1	0	0		0
gspd	t[sh]2	8	3	5	-3.22353	'34hpp'	-1.18154		1	-1.18154	2	1	1	-0.828427	'34hpp'	-0.828427		0	0	-0.353113		-1.18154
gsh	t[sh]2	8	3	5	-3.22353	'4m2opent'	0		0	0	8	4	4	-3.31371	'4m2opent'	0		1	0	0		0
gsh	gspd	5	3	2	-2.03526	'leu'	-1.18154		2	-0.59077	5	2	3	-2.03526	'leu'	-1.18154		1	-1.18154	0		0.59077
spd	gspd	5	3	2	-2.03526	'2oivlrt'	0		0	0	6	3	3	-2.48528	'2oivlrt'	0		1	0	0		0
put	spd	4	2	2	-1.65685	'val'	-1.65685		2	-0.828427	4	2	2	-1.65685	'val'	-3.17989		1	-3.17989	1.52304		2.35147
adometam	spd	4	2	2	-1.65685	'3m2opent'	0		0	0	2	1	1	-0.828427	'3m2opent'	0		1	0	0		0
adomet	adometam	3	2	1	-1.18154	'ile'	-1.65685		2	-0.828427	6	4	2	-2.36308	'ile'	-3.17989		1	-3.17989	1.52304		2.35147
met	adomet	2	1	1	-0.828427	'nflk'	-0.828427		1	-0.828427	2	1	1	-0.828427	'nflk'	-1.18154		2	-0.59077	0.353113		-0.237657
g-glucys	gsh	5	3	2	-2.03526	'l-kyn'	-1.18154		1	-1.18154	5	3	2	-2.03526	'l-kyn'	-2.03526		2	-1.01763	0.85372		-0.16391
gly	gsh	4	2	2	-1.65685	'3mob'	-1.7082		1	-1.7082	3	1	2	-1.18154	'3mob'	-1.18154		1	-1.18154	-0.526663		-0.526663
glu	g-glucys	4	2	2	-1.65685	'3mop'	-1.4641		1	-1.4641	3	1	2	-1.18154	'3mop'	-1.18154		1	-1.18154	-0.282561		-0.282561
cys	g-glucys	4	2	2	-1.65685	'4mop'	-1.4641		1	-1.4641	4	2	2	-1.65685	'4mop'	-1.18154		1	-1.18154	-0.282561		-0.282561
arg	orn	2	1	1	-0.828427	'3mbutdhla'	-1.18154		1	-1.18154	4	2	2	-1.65685	'3mbutdhla'	-1.18154		1	-1.18154	0		0
arg	urea	2	1	1	-0.828427	'2mbutdhla'	-1.18154		1	-1.18154	3	1	2	-1.18154	'2mbutdhla'	-1.18154		1	-1.18154	0		0
orn	put	3	2	1	-1.18154	'2mpdhla'	-1.18154		1	-1.18154	3	1	2	-1.18154	'2mpdhla'	-1.18154		1	-1.18154	0		0
hta	mg	6	3	3	-2.48528	'ivcoa'	-1.18154		1	-1.18154	3	1	2	-1.18154	'ivcoa'	-1.18154		1	-1.18154	0		0
trp	nflk	2	1	1	-0.828427	'2mbcoa'	-1.18154		1	-1.18154	3	1	2	-1.18154	'2mbcoa'	-1.18154		1	-1.18154	0		0
nflk	l-kyn	3	2	1	-1.18154	'ibcoa'	-1.18154		1	-1.18154	5	2	3	-2.03526	'ibcoa'	-1.18154		1	-1.18154	0		0
nflk	formate	4	2	2	-1.65685	'2mbecoa'	-1.18154		1	-1.18154	2	1	1	-0.828427	'2mbecoa'	-1.18154		1	-1.18154	0		0
l-kyn	anthra	3	2	1	-1.18154	'3mb2coa'	-1.18154		1	-1.18154	4	2	2	-1.65685	'3mb2coa'	-1.18154		1	-1.18154	0		0
l-kyn	ala	4	2	2	-1.65685	'macoa'	-1.18154		1	-1.18154	4	2	2	-1.65685	'macoa'	-1.18154		1	-1.18154	0		0
pyr	ala	9	7	2	-3.17989	'3hibcoa'	-1.18154		1	-1.18154	4	2	2	-1.65685	'3hibcoa'	-1.18154		1	-1.18154	0		0
anthra	42aphdob	3	2	1	-1.18154	'3hmbcoa'	-1.18154		1	-1.18154	2	1	1	-0.828427	'3hmbcoa'	-1.18154		1	-1.18154	0		0
3m2opent	ile	3	1	2	-1.18154	'3hib'	-1.18154		1	-1.18154	3	1	2	-1.18154	'3hib'	-1.18154		1	-1.18154	0		0
4m2opent	leu	3	1	2	-1.18154	'2maacoa'	-1.18154		1	-1.18154	3	1	2	-1.18154	'2maacoa'	-1.18154		2	-0.59077	0		-0.59077
2oivlrt	val	3	1	2	-1.18154	'mmsald'	-1.18154		1	-1.18154	3	1	3	-0.732051	'mmsald'	-1.18154		1	-1.18154	0		0
glu	ile	4	2	2	-1.65685	'mmalonat'	-1.18154		1	-1.18154	9	7	2	-3.17989	'mmalonat'	-1.18154		1	-1.18154	0		0
glu	leu	4	2	2	-1.65685	'ppcoa'	-1.18154		1	-1.18154	9	7	2	-3.17989	'ppcoa'	-0.828427		0	0	-0.353113		-1.18154
glu	val	4	2	2	-1.65685	'3mercpyr'	-1.4641		1	-1.4641	9	7	2	-3.17989	'3mercpyr'	-3.22833		0	0	1.76423		-1.4641
glu	1pl5c	3	2	1	-1.18154	'lplprot'	-1.18154		1	-1.18154	9	7	2	-3.17989	'lplprot'	-1.18154		1	-1.18154	0		0
glu	phe	3	2	1	-1.18154	'dhlplprot'	-1.4641		1	-1.4641	9	7	2	-3.17989	'dhlplprot'	-1.65685		1	-1.65685	0.192753		0.192753
glu	gln	3	2	1	-1.18154	'amlplprot'	-1.65685		1	-1.65685	9	7	2	-3.17989	'amlplprot'	-1.18154		2	-0.59077	-0.475314		-1.06608
1pl5c	pro	3	2	1	-1.18154	'42aphdob'	-1.18154		1	-1.18154	2	1	1	-0.828427	'42aphdob'	-0.828427		0	0	-0.353113		-1.18154
akg	glu	4	3	1	-1.4641	'adesuc'	-0.828427		1	-0.828427	10	2	8	-3.41641	'adesuc'	-2.36308		1	-2.36308	1.53465		1.53465
phepyr	phe	3	1	2	-1.18154						3	1	2	-1.18154
phe	tyr	4	3	1	-1.4641						3	1	2	-1.18154
tyr	34hpp	3	2	1	-1.18154						2	1	1	-0.828427
3pga	3phpyr	3	2	1	-1.18154						5	2	3	-2.03526
3phpyr	akg	4	2	2	-1.65685						5	2	3	-2.03526
3phpyr	3pser	3	2	1	-1.18154						4	2	2	-1.65685
3pser	ser	3	2	1	-1.18154						6	1	5	-1.92672
ser	cysthione	3	2	1	-1.18154						7	4	3	-2.87408
cysthione	hcys	3	2	1	-1.18154						5	2	3	-2.03526
hcys	met	4	2	2	-1.65685						3	2	1	-1.18154
hcys	thf	4	2	2	-1.65685						4	2	2	-1.65685
thf	thfglu	4	3	1	-1.4641						3	1	2	-1.18154
thfglu	thfpolyglu	3	2	1	-1.18154						2	1	1	-0.828427
fol	thf	3	2	1	-1.18154						3	1	2	-1.18154
dhf	fol	3	2	1	-1.18154						3	1	2	-1.18154
dhpt	dhf	2	1	1	-0.828427						3	1	2	-1.18154
ser	oacser	4	2	2	-1.65685						6	4	2	-2.36308
oacser	cys	5	3	2	-2.03526						5	1	4	-1.7082
ser	cys	4	2	2	-1.65685						7	3	4	-2.87408
cys	3mercpyr	4	3	1	-1.4641						7	3	1	-3.22833
leu	4mop	4	3	1	-1.4641						3	1	2	-1.18154
4mop	3mbutdhla	3	2	1	-1.18154						3	1	2	-1.18154
3mbutdhla	ivcoa	3	2	1	-1.18154						3	1	2	-1.18154
ivcoa	3mb2coa	3	2	1	-1.18154						3	1	2	-1.18154
3mb2coa	3mgcoa	3	2	1	-1.18154						3	1	2	-1.18154
val	3mob	5	4	1	-1.7082						3	1	2	-1.18154
3mob	2mpdhla	3	2	1	-1.18154						3	1	2	-1.18154
2mpdhla	ibcoa	3	2	1	-1.18154						3	1	2	-1.18154
ivbcoa	macoa	3	2	1	-1.18154						3	1	2	-1.18154
macoa	3hibcoa	3	2	1	-1.18154						3	1	2	-1.18154
3hibcoa	3hib	3	2	1	-1.18154						3	1	2	-1.18154
3hib	mmsald	3	2	1	-1.18154						3	1	2	-1.18154
mmsald	mmalonat	3	2	1	-1.18154						3	1	2	-1.18154
mmalonat	malcoa	3	2	2	-0.898979						13	1	12	-3.09555
ile	3mop	4	3	1	-1.4641						3	1	2	-1.18154
3mop	2mbutdhla	3	2	1	-1.18154						3	1	2	-1.18154
3mbutdhla	2mbcoa	3	2	1	-1.18154						3	1	2	-1.18154
2mbcoa	2mbecoa	3	2	1	-1.18154						3	1	2	-1.18154
2mbecoa	3hmbcoa	3	2	1	-1.18154						3	1	2	-1.18154
3hmbcoa	2maacoa	3	2	1	-1.18154						3	1	2	-1.18154
2maacoa	acoa	4	2	2	-1.65685						7	1	7	-1.64575
2maacoa	ppcoa	3	2	1	-1.18154						2	1	1	-0.828427
ser	gly	4	2	2	-1.65685						7	4	3	-2.87408
gly	thr	4	2	2	-1.65685						3	2	1	-1.18154
acald	thr	3	1	2	-1.18154						2	1	1	-0.828427
phser	thr	3	2	2	-0.898979						2	1	1	-0.828427
hser	phser	3	2	1	-1.18154						3	1	2	-1.18154
aspsa	hser	3	2	1	-1.18154						3	1	2	-1.18154
asp	aspsa	2	1	1	-0.828427						6	4	2	-2.36308
asp	asn	2	1	1	-0.828427						5	4	1	-1.7082
asp	adesuc	2	1	1	-0.828427						6	4	2	-2.36308
adesuc	fum	5	2	3	-2.03526						2	1	1	-0.828427
gly	amlplprot	4	2	2	-1.65685						6	3	3	-2.48528
amlplprot	mthf	4	3	1	-1.4641						4	2	2	-1.65685
lplprot	amlplprot	4	2	2	-1.65685						3	1	2	-1.18154
dhlplprot	lplprot	3	2	1	-1.18154						3	1	2	-1.18154
amlplprot	dhlplprot	4	3	1	-1.4641						4	2	2	-1.65685
glycerol	g3p	6	2	4	-2.36308						3	1	2	-1.18154

## Sheet: F(e)ForDistributionPlot_Master
		Forman curvature of edges
		total Weight	Degree
ev1v2		wt	v1 (in)	v2 (out)	Fe	Fe	v	F(v)
(b-D-glc,)	b-D-glc6p	2	0	2	#DIV/0!	0	'b-D-glc'	0
b-D-glc6p,	b-D-fr6P	3	1	2	-1.18154	-1.18154	'prpp'	-2.36308
b-D-glc6p,	g15l6p	2	1	1	-0.828427	-0.828427	'r5p'	-1.18154
b-D-fr6P	b-D-fr16P	4	2	2	-1.65685	-1.65685	'gdpman'	-0.828427
fructose	b-D-fr6P	2	0	2	#DIV/0!	0	'man1p'	-1.18154
b-D-fr6P	man6p	3	2	1	-1.18154	-1.18154	'man6p'	-1.18154
mannose	man6p	1	0	1	#DIV/0!	0	'b-D-fr6p'	-1.18154
man6p	man1p	3	2	1	-1.18154	-1.18154	'b-D-glc6p'	0
man1p	gdpman	2	1	1	-0.828427	-0.828427	'mannan'	0
gdpman	mannan	1	1	0	#DIV/0!	0	'b-D-fr16p'	-1.65685
b-D-fr16P	ga3p	3	1	2	-1.18154	-1.18154	'dhap'	-3.2168
b-D-fr16P	dhap	3	1	2	-1.18154	-1.18154	'ga3p'	-3.2168
dhap	g3p	2	1	1	-0.828427	-0.828427	'suc'	-0.828427
ga3p	bpg	2	1	1	-0.828427	-0.828427	'bpg'	-0.828427
bpg	3pga	2	1	1	-0.828427	-0.828427	'fum'	-0.828427
3pga	2pga	2	1	1	-0.828427	-0.828427	'3pga'	-0.828427
2pga	pep	3	1	2	-1.18154	-1.18154	'mal'	-2.29253
pep	pyr	3	1	2	-1.18154	-1.18154	'2pga'	-0.828427
pyr	acoa	12	6	6	-4.97056	-4.97056	'oaa'	-1.65685
acoa	ac	1	1	0	#DIV/0!	0	'pep'	-1.18154
acoa	cit	2	1	1	-0.828427	-0.828427	'pyr'	-6.85833
acoa	oaa	2	1	1	-0.828427	-0.828427	'acoa'	-4.97056
pep	oaa	2	1	1	-0.828427	-0.828427	'succoa'	-0.828427
oaa	mal	4	3	1	-1.4641	-1.4641	'isocit'	-0.828427
mal	pyr	4	2	2	-1.65685	-1.65685	'cisaco'	-0.828427
cit	cisaco	2	1	1	-0.828427	-0.828427	'cit'	-0.828427
cisaco	isocit	2	1	1	-0.828427	-0.828427	'g15l6p'	-0.828427
isocit	akg	3	1	2	-1.18154	-1.18154	'gl6p'	-0.828427
akg	succoa	2	1	1	-0.828427	-0.828427	'ribl5p'	-1.18154
succoa	suc	3	1	2	-1.18154	-1.18154	'sdhpt7p'	0
suc	ac	1	1	0	#DIV/0!	0	'erth4p'	0
suc	fum	2	1	1	-0.828427	-0.828427	'xyl5p'	-1.18154
fum	mal	2	1	1	-0.828427	-0.828427	'f6p'	-1.18154
g15l6p	gl6p	2	1	1	-0.828427	-0.828427	'f16p'	-1.18154
gl6p	ribl5p	3	1	2	-1.18154	-1.18154	'g3p'	-3.31371
ribl5p	r5p	3	1	2	-1.18154	-1.18154	'akg'	-2.36308
r5p	prpp	3	1	2	-1.18154	-1.18154	'ac'	0
ribl5p	xyl5p	3	1	2	-1.18154	-1.18154	mannose'	0
r5p	sdhpt7p	1	1	0	#DIV/0!	0	fructose'	0
xyl5p	sdhpt7p	1	1	0	#DIV/0!	0	'btcoa'	0
xyl5p	f6p	3	1	2	-1.18154	-1.18154	'occoa'	-2.00997
f6p	f16p	3	2	1	-1.18154	-1.18154	'hxcoa'	-0.828427
f6p	sdhpt7p	2	2	0	#DIV/0!	0	'dccoa'	-2.00997
erth4p	f6p	2	0	2	#DIV/0!	0	'ddcoa'	-2.00997
erth4p	sdpth7p	0	0	0	#DIV/0!	0	'stdcoa'	-0.828427
cys	pyr	4	2	2	-1.65685	-1.65685	'eictrcoa'	-1.65685
cysthione	pyr	3	1	2	-1.18154	-1.18154	'dcotcoa'	-1.65685
ala	pyr	4	2	2	-1.65685	-1.65685	'eicpcoa'	-1.18154
acoa	malcoa	12	1	11	-2.95323	-2.95323	'eictcoa'	-1.65685
malcoa	hxcoa	2	1	1	-0.828427	-0.828427	'dc4pcoa'	0
btcoa	hxcoa	1	0	1	#DIV/0!	0	'dcopcoa'	-1.65685
hxcoa	occoa	3	2	1	-1.18154	-1.18154	'dchxcoa'	-1.18154
malcoa	occoa	2	1	1	-0.828427	-0.828427	'acdcoa'	-1.18154
occoa	dccoa	3	2	1	-1.18154	-1.18154	'malcoa'	-2.95323
malcoa	dccoa	2	1	1	-0.828427	-0.828427	'strcoa'	-2.00997
dccoa	ddcoa	3	2	1	-1.18154	-1.18154	'pmtcoa'	-2.00997
malcoa	ddcoa	2	1	1	-0.828427	-0.828427	'tdcoa'	-2.00997
ddcoa	tdcoa	3	2	1	-1.18154	-1.18154	'lincoa'	-0.828427
malcoa	tdcoa	2	1	1	-0.828427	-0.828427	'olcoa'	-1.18154
tdcoa	pmtcoa	3	2	1	-1.18154	-1.18154	'glincoa'	-1.18154
malcoa	pmtcoa	2	1	1	-0.828427	-0.828427	'a-lincoa'	-0.828427
pmtcoa	strcoa	3	2	1	-1.18154	-1.18154	'hmgcoa'	-1.65685
malcoa	strcoa	2	1	1	-0.828427	-0.828427	'mev5p'	-0.828427
strcoa	olcoa	3	2	1	-1.18154	-1.18154	'ipdp'	-1.4641
olcoa	lincoa	2	1	1	-0.828427	-0.828427	'dmpp'	-0.828427
lincoa	a-lincoa	2	1	1	-0.828427	-0.828427	'geranylpp'	-1.65685
a-lincoa	g-lincoa	3	1	2	-1.18154	-1.18154	'farnasylpp'	-2.00997
g-lincoa	stdcoa	2	1	1	-0.828427	-0.828427	'sql'	-1.18154
stdcoa	eictcoa	2	1	1	-0.828427	-0.828427	'lanostr'	-1.18154
malcoa	eictcoa	2	1	1	-0.828427	-0.828427	'44mctr'	-0.828427
eictcoa	eicpcoa	3	2	1	-1.18154	-1.18154	'14dmls'	-0.828427
eicpcoa	dcopcoa	2	1	1	-0.828427	-0.828427	'ergsttr'	-0.828427
malcoa	dcopcoa	2	1	1	-0.828427	-0.828427	'3mgcoa'	-0.828427
dcopcoa	dchxcoa	3	2	1	-1.18154	-1.18154	'acacylcoa'	0
g-lincoa	eictrcoa	2	1	1	-0.828427	-0.828427	'mev'	-1.18154
eictrcoa	acdcoa	3	2	1	-1.18154	-1.18154	'mev5pp'	-0.828427
malcoa	eictrcoa	2	1	1	-0.828427	-0.828427	'fecostr'	-0.828427
acdcoa	dcotcoa	2	1	1	-0.828427	-0.828427	'ergsttet'	-0.828427
malcoa	dcotcoa	2	1	1	-0.828427	-0.828427	'ergstr'	-0.828427
dcotcoa	dc4pcoa	2	2	0	#DIV/0!	0	'sql23epx'	-0.828427
3mgcoa	hmgcoa	2	1	1	-0.828427	-0.828427	'epistr'	-0.828427
acoa	hmgcoa	2	1	1	-0.828427	-0.828427	'formate'	0
acacylcoa	hmgcoa	1	0	1	#DIV/0!	0	'zym'	-0.828427
hmgcoa	mev	3	2	1	-1.18154	-1.18154	'glycerol'	-0.828427
mev	mev5p	2	1	1	-0.828427	-0.828427	'clpn'	0
mev5p	mev5pp	2	1	1	-0.828427	-0.828427	'1ag3p'	-1.7082
mev5pp	ipdp	4	1	3	-1.4641	-1.4641	'pg'	0
ipdp	dmpp	2	1	1	-0.828427	-0.828427	'acylcoa'	0
ipdp	geranylpp	2	1	1	-0.828427	-0.828427	'mino'	0
ipdp	farnasylpp	2	1	1	-0.828427	-0.828427	'cdpdag'	-1.65685
dmpp	geranylpp	2	1	1	-0.828427	-0.828427	'pa'	-3.69212
geranylpp	farnasylpp	3	2	1	-1.18154	-1.18154	'ptd1ino'	0
farnasylpp	sql	3	2	1	-1.18154	-1.18154	'mag'	-2.48528
sql	sql23epx	2	1	1	-0.828427	-0.828427	'12dgr'	-2.36308
sql23epx	lanostr	3	1	2	-1.18154	-1.18154	'fa(pmtacid)'	0
lanostr	44mctr	2	1	1	-0.828427	-0.828427	'tgr'	0
lanostr	formate	1	1	0	#DIV/0!	0	'cdpe'	0
44mctr	14dmls	2	1	1	-0.828427	-0.828427	'peth'	0
14mdls	zym	2	1	1	-0.828427	-0.828427	'pe'	-3.2168
zym	fecostr	2	1	1	-0.828427	-0.828427	'1g3pe'	-1.65685
fecostr	epistr	2	1	1	-0.828427	-0.828427	'g3pe'	-1.18154
epistr	ergsttr	2	1	1	-0.828427	-0.828427	'ethan'	0
ergsttr	ergsttet	2	1	1	-0.828427	-0.828427	'carboxylate'	0
ergsttet	ergstr	1	1	0	#DIV/0!	0	'mmpe'	-1.18154
g3p	1ag3p	5	4	1	-1.7082	-1.7082	'1g3pc'	-1.18154
1ag3p	pa	4	2	2	-1.65685	-1.65685	'pc'	-1.18154
acylcoa	1ag3p	1	0	1	#DIV/0!	0	'dimpe'	-0.828427
acylcoa	pa	2	0	2	#DIV/0!	0	'g3pc'	-1.18154
pa	12dgr	6	2	4	-2.36308	-2.36308	'chol'	0
acylcoa	12dgr	4	0	4	#DIV/0!	0	'carbp'	-0.828427
12dgr	pa	5	3	2	-2.03526	-2.03526	'carblasp'	-0.828427
pa	cdpdag	4	2	2	-1.65685	-1.65685	'dhort'	-1.18154
cdpdag	clpn	1	1	0	#DIV/0!	0	'ort'	-1.65685
pg	clpn	0	0	0	#DIV/0!	0	'ortdn5p'	-1.65685
cdpdag	ptd1ino	1	1	0	#DIV/0!	0	'uridine'	0
mino	ptd1ino	0	0	0	#DIV/0!	0	'cytidine'	0
mag	glycerol	2	1	1	-0.828427	-0.828427	'cdp'	0
mag	12dgr	5	1	4	-1.7082	-1.7082	'hxan'	0
mag	fa	1	1	0	#DIV/0!	0	'xan'	0
12dgr	mag	6	3	3	-2.48528	-2.48528	'gln'	-0.828427
12dgr	fa	3	3	0	#DIV/0!	0	'amp'	-2.29253
12dgr	tgr	3	3	0	#DIV/0!	0	'asp'	0
12dgr	pe	5	3	2	-2.03526	-2.03526	'cmp'	0
cdpe	pe	3	1	2	-1.18154	-1.18154	'ctp'	0
peth	cdpe	1	0	1	#DIV/0!	0	'gmp'	0
pe	1g3pe	4	2	2	-1.65685	-1.65685	'dgmp'	0
pe	carboxylate	2	2	0	#DIV/0!	0	'damp'	0
1g3pe	g3pe	3	1	2	-1.18154	-1.18154	'dcmp'	0
1g3pe	fa	1	1	0	#DIV/0!	0	'dtmp'	0
g3pe	g3p	2	1	1	-0.828427	-0.828427	'gtp'	0
g3pe	ethan	1	1	0	#DIV/0!	0	'gdp'	0
pe	mmpe	3	2	1	-1.18154	-1.18154	'atp'	0
mmpe	dimpe	2	1	1	-0.828427	-0.828427	'adp'	0
dimpe	pc	3	1	2	-1.18154	-1.18154	'xmp'	-3.69212
pc	1g3pc	3	1	2	-1.18154	-1.18154	'dgdp'	-0.828427
pc	carboxylate	2	2	0	#DIV/0!	0	'imp'	-2.36308
1g3pc	g3pc	3	1	2	-1.18154	-1.18154	'dadp'	-0.828427
1g3pc	fa	1	1	0	#DIV/0!	0	'udp'	0
g3pc	g3p	2	1	1	-0.828427	-0.828427	'dcdp'	-0.828427
g3pc	chol	1	1	0	#DIV/0!	0	'dudp'	0
atp	adp	3	0	2	#DIV/0!	0	'dutp'	0
adp	dadp	2	1	1	-0.828427	-0.828427	'ump'	-3.12096
dadp	damp	1	1	0	#DIV/0!	0	't[sh]2'	-4.01994
adp	amp	2	1	1	-0.828427	-0.828427	'adomet'	-1.18154
amp	imp	3	2	1	-1.18154	-1.18154	'met'	-0.828427
hxan	imp	1	0	1	#DIV/0!	0	'gly'	-1.4641
prpp	imp	3	2	1	-1.18154	-1.18154	'cys'	-2.83839
imp	xmp	5	3	2	-2.03526	-2.03526	'arg'	0
xan	xmp	2	0	2	#DIV/0!	0	'orn'	0
prpp	xmp	4	2	2	-1.65685	-1.65685	'urea'	0
xmp	amp	4	3	1	-1.4641	-1.4641	'adometam'	-0.828427
xmp	gmp	3	3	0	#DIV/0!	0	'put'	-0.828427
gdp	gmp	1	1	0	#DIV/0!	0	g-glucys'	-2.00997
gtp	gdp	2	0	2	#DIV/0!	0	'gsh'	-2.83839
gdp	dgdp	2	1	1	-0.828427	-0.828427	'spd'	-1.65685
dgdp	dgmp	1	1	0	#DIV/0!	0	'gspd'	-2.36308
gln	carbp	2	1	1	-0.828427	-0.828427	'ts2'	0
carbp	carblasp	2	1	1	-0.828427	-0.828427	'glu'	-3.17989
asp	carblasp	1	0	1	#DIV/0!	0	'mg'	-4.97056
carblasp	dhort	3	2	1	-1.18154	-1.18154	'hta'	-5.70882
dhort	ort	2	1	1	-0.828427	-0.828427	'D-lacgsh'	-1.65685
suc	ort	2	1	1	-0.828427	-0.828427	'D-lac'	-0.828427
dhort	fum	2	1	1	-0.828427	-0.828427	'L-lactald'	-1.4641
suc	fum	2	1	1	-0.828427	-0.828427	'L-lac'	0
ort	ortdn5p	4	2	2	-1.65685	-1.65685	'ala'	-2.95492
ortdn5p	ump	4	1	3	-1.4641	-1.4641	'thf'	-1.65685
ortdn5p	prpp	3	1	2	-1.18154	-1.18154	'mthf'	-1.18154
ump	dtmp	4	4	0	#DIV/0!	0	'ser'	-1.7082
udp	ump	1	0	1	#DIV/0!	0	'pro'	0
dudp	ump	2	1	1	-0.828427	-0.828427	'acald'	0
dutp	dudp	1	0	1	#DIV/0!	0	'thr'	0
uridine	ump	2	1	1	-0.828427	-0.828427	'asn'	0
cytidine	uridine	1	0	1	#DIV/0!	0	'trp'	0
cytidine	cmp	0	0	0	#DIV/0!	0	'anthra'	-0.828427
cdp	cmp	1	1	0	#DIV/0!	0	'phe'	-0.828427
ctp	cdp	2	0	2	#DIV/0!	0	'tyr'	-1.18154
cdp	dcdp	2	1	1	-0.828427	-0.828427	'fol'	-0.828427
dcdp	dcmp	1	1	0	#DIV/0!	0	'dhf'	0
dhap	mg	4	2	2	-1.65685	-1.65685	'dhpt'	0
ga3p	mg	4	2	2	-1.65685	-1.65685	'thfglu'	-0.828427
mg	dhap	5	3	2	-2.03526	-2.03526	'thfpolyglu'	0
mg	ga3p	5	3	2	-2.03526	-2.03526	'3phpyr'	-0.828427
mg	hta	6	3	3	-2.48528	-2.48528	'3pser'	-0.828427
t[sh]2	hta	8	5	3	-3.22353	-3.22353	'oacser'	-0.828427
hta	D-lacgsh	4	2	2	-1.65685	-1.65685	'aspsa'	0
D-lacgsh	D-lac	2	1	1	-0.828427	-0.828427	'hser'	-0.828427
D-lac	pyr	3	1	2	-1.18154	-1.18154	'phser'	-0.828427
mg	L-lactald	4	3	1	-1.4641	-1.4641	'1pl5c'	-0.828427
L-lactald	L-lac	1	1	0	#DIV/0!	0	'cysthion'	-1.18154
hta	t[sh]2	4	2	2	-1.65685	-1.65685	'hcys'	-1.18154
ts2	t[sh]2	1	0	1	#DIV/0!	0	'phepyr'	0
gspd	t[sh]2	3	2	1	-1.18154	-1.18154	'34hpp'	0
gsh	t[sh]2	3	2	1	-1.18154	-1.18154	'4m2opent'	0
gsh	gspd	3	2	1	-1.18154	-1.18154	'leu'	0
spd	gspd	3	2	1	-1.18154	-1.18154	'2oivlrt'	0
put	spd	2	1	1	-0.828427	-0.828427	'val'	-0.828427
adometam	spd	2	1	1	-0.828427	-0.828427	'3m2opent'	0
adomet	adometam	2	1	1	-0.828427	-0.828427	'ile'	-0.828427
met	adomet	3	2	1	-1.18154	-1.18154	'nflk'	0
g-glucys	gsh	4	2	2	-1.65685	-1.65685	'l-kyn'	-0.828427
gly	gsh	3	1	2	-1.18154	-1.18154	'3mob'	-1.18154
glu	g-glucys	2	1	1	-0.828427	-0.828427	'3mop'	-1.18154
cys	g-glucys	3	2	1	-1.18154	-1.18154	'4mop'	-1.18154
arg	orn	1	0	1	#DIV/0!	0	'3mbutdhla'	-0.828427
arg	urea	0	0	0	#DIV/0!	0	'2mbutdhla'	-0.828427
orn	put	2	1	1	-0.828427	-0.828427	'2mpdhla'	-0.828427
hta	mg	4	2	2	-1.65685	-1.65685	'ivcoa'	-0.828427
trp	nflk	1	0	1	#DIV/0!	0	'2mbcoa'	-0.828427
nflk	l-kyn	2	1	1	-0.828427	-0.828427	'ibcoa'	-0.828427
nflk	formate	1	1	0	#DIV/0!	0	'2mbecoa'	-0.828427
l-kyn	anthra	2	1	1	-0.828427	-0.828427	'3mb2coa'	-0.828427
l-kyn	ala	2	1	1	-0.828427	-0.828427	'macoa'	-0.828427
pyr	ala	7	6	1	-2.12649	-2.12649	'3hibcoa'	-0.828427
anthra	42aphdob	1	1	0	#DIV/0!	0	'3hmbcoa'	-0.828427
3m2opent	ile	1	0	1	#DIV/0!	0	'3hib'	-0.828427
4m2opent	leu	1	0	1	#DIV/0!	0	'2maacoa'	-0.828427
2oivlrt	val	1	0	1	#DIV/0!	0	'mmsald'	-0.828427
glu	ile	2	1	1	-0.828427	-0.828427	'mmalonat'	-0.828427
glu	leu	2	1	1	-0.828427	-0.828427	'ppcoa'	0
glu	val	2	1	1	-0.828427	-0.828427	'3mercpyr'	0
glu	1pl5c	2	1	1	-0.828427	-0.828427	'lplprot'	-0.828427
glu	phe	2	1	1	-0.828427	-0.828427	'dhlplprot'	-1.18154
glu	gln	2	1	1	-0.828427	-0.828427	'amlplprot'	-1.18154
1pl5c	pro	1	1	0	#DIV/0!	0	'42aphdob'	0
akg	glu	9	2	7	-3.17989	-3.17989	'adesuc'	0
phepyr	phe	1	0	1	#DIV/0!	0
phe	tyr	3	2	1	-1.18154	-1.18154
tyr	34hpp	1	1	0	#DIV/0!	0
3pga	3phpyr	2	1	1	-0.828427	-0.828427
3phpyr	akg	3	1	2	-1.18154	-1.18154
3phpyr	3pser	2	1	1	-0.828427	-0.828427
3pser	ser	5	1	4	-1.7082	-1.7082
ser	cysthione	3	1	2	-1.18154	-1.18154
cysthione	hcys	3	1	2	-1.18154	-1.18154
hcys	met	2	1	1	-0.828427	-0.828427
hcys	thf	2	1	1	-0.828427	-0.828427
thf	thfglu	2	1	1	-0.828427	-0.828427
thfglu	thfpolyglu	1	1	0	#DIV/0!	0
fol	thf	2	1	1	-0.828427	-0.828427
dhf	fol	2	1	1	-0.828427	-0.828427
dhpt	dhf	1	0	1	#DIV/0!	0
ser	oacser	2	1	1	-0.828427	-0.828427
oacser	cys	4	2	2	-1.65685	-1.65685
ser	cys	3	1	2	-1.18154	-1.18154
cys	3mercpyr	2	2	0	#DIV/0!	0
leu	4mop	3	2	1	-1.18154	-1.18154
4mop	3mbutdhla	2	1	1	-0.828427	-0.828427
3mbutdhla	ivcoa	2	1	1	-0.828427	-0.828427
ivcoa	3mb2coa	2	1	1	-0.828427	-0.828427
3mb2coa	3mgcoa	2	1	1	-0.828427	-0.828427
val	3mob	3	2	1	-1.18154	-1.18154
3mob	2mpdhla	2	1	1	-0.828427	-0.828427
2mpdhla	ibcoa	2	1	1	-0.828427	-0.828427
ivbcoa	macoa	2	1	1	-0.828427	-0.828427
macoa	3hibcoa	2	1	1	-0.828427	-0.828427
3hibcoa	3hib	2	1	1	-0.828427	-0.828427
3hib	mmsald	2	1	1	-0.828427	-0.828427
mmsald	mmalonat	2	1	1	-0.828427	-0.828427
mmalonat	malcoa	12	1	11	-2.95323	-2.95323
ile	3mop	3	2	1	-1.18154	-1.18154
3mop	2mbutdhla	2	1	1	-0.828427	-0.828427
3mbutdhla	2mbcoa	2	1	1	-0.828427	-0.828427
2mbcoa	2mbecoa	2	1	1	-0.828427	-0.828427
2mbecoa	3hmbcoa	2	1	1	-0.828427	-0.828427
3hmbcoa	2maacoa	2	1	1	-0.828427	-0.828427
2maacoa	acoa	7	1	6	-2.12649	-2.12649
2maacoa	ppcoa	1	1	0	#DIV/0!	0
ser	gly	4	1	3	-1.4641	-1.4641
gly	thr	1	1	0	#DIV/0!	0
acald	thr	0	0	0	#DIV/0!	0
phser	thr	1	1	0	#DIV/0!	0
hser	phser	2	1	1	-0.828427	-0.828427
aspsa	hser	2	1	1	-0.828427	-0.828427
asp	aspsa	1	0	1	#DIV/0!	0
asp	asn	0	0	0	#DIV/0!	0
asp	adesuc	1	0	1	#DIV/0!	0
adesuc	fum	1	1	0	#DIV/0!	0
gly	amlplprot	3	1	2	-1.18154	-1.18154
amlplprot	mthf	3	2	1	-1.18154	-1.18154
lplprot	amlplprot	3	1	2	-1.18154	-1.18154
dhlplprot	lplprot	2	1	1	-0.828427	-0.828427
amlplprot	dhlplprot	3	2	1	-1.18154	-1.18154
glycerol	g3p	2	1	1	-0.828427	-0.828427

## Sheet: Frequency plots_MasterModel
Fe	Frequency		FI(e)	Frequency		FO(e)	Frequency		Fo(v) unnormalized	Frequency		FI(v) unnormalized	Frequency		F(v)	Frequency
0	74		-0.828427	15		-1.4641	24		-4.07052	2		-2.36308	2		-6.85833	1
-1.18154	61		-1.65685	55		-2.03526	31		-2.03526	13		-1.18154	87		-5.70882	1
-0.828427	108		-1.18154	109		-1.65685	33		-1.18154	63		-1.4641	23		-4.97056	2
-1.65685	16		-1.4641	29		-1.18154	110		-3.49936	3		-2.03526	1		-4.01994	1
-4.97056	1		-2.03526	24		-0.828427	25		-1.4641	12		-2.83839	9		-3.69212	2
-1.4641	6		-3.22353	4		-3.17989	9		-0.828427	15		-0.828427	15		-3.31371	1
-2.95323	2		-2.9282	3		-2.31174	1		-1.65685	17		-3.54462	2		-3.2168	3
-1.7082	3		-2.31174	1		-1.7082	5		-2.48528	2		-3.2168	2		-3.17989	1
-2.36308	1		-2.36308	15		-2.48528	4		-2.36308	7		-3.69212	11		-3.12096	1
-2.48528	2		-2.87408	5		-2.87408	6		-5.21516	1		-3.31371	8		-2.95492	2
-2.03526	5		-1.7082	7		-4.12663	1		-11.2828	1		-16.1731	1		-2.83839	2
-3.22353	1		-3.84383	1		-2.95323	11		-7.17292	1		-2.31174	1		-2.48528	1
-2.12649	1		-3.54462	2		-2.65774	2		-6.50522	1		-8.46069	1		-2.36308	5
-3.17989	1		-2.65774	1		-0.732051	2		-5.95935	1		-9.65714	1		-2.29253	2
-2.12649	1		-3.31371	1		-3.22353	3		-5.88127	1		-1.65685	9		-2.00997	8
			-2.48528	6		-1.82843	1		-5.7539	1		-3.12096	1		-1.7082	2
			-1.92672	2		-3.7082	2		-5.41641	1		-5.53462	1		-1.65685	15
			-3.17989	1		-1.92672	3		-5.29128	1		-1.7082	5		-1.4641	3
			-0.898979	2		-2.36308	5		-5.20148	1		-3.83928	1		-1.18154	33
						-3.31371	1		-5.02082	1		-6.09088	1		-0.828427	70
						-3.41641	1		-4.61008	1		-4.33818	1		0	69
						-3.22833	1		-4.58228	1		-10.403	1
						-3.09555	1		-4.52054	2		-4.01994	3
						-1.64575	1		-4.49525	1		-1.92672	1
									-4.13477	10		-6.82346	1
									-4.12663	1		-6.43466	1
									-4.01994	1		-8.79745	1
									-3.7082	1		-11.2479	1
									-3.69212	1		-4.07052	1
									-3.54462	1		-7.45584	1
									-3.41641	1		-5.9077	1
									-3.31371	2		-4.83675	1
									-3.22833	1		-3.73737	1
									-3.2168	5		0	28
									-3.17989	7
									-2.87408	3
									-2.83839	4
									-2.65685	1
									-2.64564	1
									-2.00997	2
									-1.92672	2
									-1.7082	2
									-0.732051	1
									0	28

## Sheet: Forman_degree_MasterModel
		IN FORMAN								OUT FORMAN
		total Weight for In Forman	In degree							total Weight for Out Forman	out degree						Total flow through a particular node
ev1v2		In degree weight	v1	v2	FI(e)	FI(e) normalized	v	FI(v)		Out degree weight	v1	v2	Fo	FO(e) normalized	v	FO(v)	FI(v)- FO(v)
(b-D-glc,)	b-D-glc6p	0	0	0	#DIV/0!	0	b-D-glc	0		2	0	2	#DIV/0!	0	b-D-glc	0	0
b-D-glc6p,	b-D-fr6P	2	1	1	-0.828427	-0.828427	b-D-glc6p	0		3	1	2	-1.18154	-1.18154	b-D-glc6p	-2.00997	2.00997
b-D-glc6p,	g15l6p	1	1	0	#DIV/0!	0	b-D-fr6p	-0.828427		2	1	1	-0.828427	-0.828427	b-D-fr6p	-2.00997	1.18154
b-D-fr6P	b-D-fr16P	2	2	0	#DIV/0!	0	fructose	0		3	1	2	-1.18154	-1.18154	fructose	0	0
fructose	b-D-fr6P	1	0	1	#DIV/0!	0	mannose	0		2	0	2	#DIV/0!	0	mannose	0	0
b-D-fr6P	man6p	3	2	1	-1.18154	-1.18154	man6p	-1.18154		2	1	1	-0.828427	-0.828427	man6p	0	-1.18154
mannose	man6p	1	0	1	#DIV/0!	0	man1p	0		1	0	1	#DIV/0!	0	man1p	0	0
man6p	man1p	2	2	0	#DIV/0!	0	gdpman	0		1	0	1	#DIV/0!	0	gdpman	0	0
man1p	gdpman	1	1	0	#DIV/0!	0	mannan	0		1	0	1	#DIV/0!	0	mannan	0	0
gdpman	mannan	1	1	0	#DIV/0!	0	b-D-fr16p	0		0	0	0	#DIV/0!	0	b-D-fr16p	-0.828427	0.828427
b-D-fr16P	ga3p	1	1	0	#DIV/0!	0	ga3p	0		2	0	2	#DIV/0!	0	ga3p	0	0
b-D-fr16P	dhap	1	1	0	#DIV/0!	0	dhap	0		2	1	1	-0.828427	-0.828427	dhap	0	0
dhap	g3p	1	1	0	#DIV/0!	0	g3p	0		1	1	0	#DIV/0!	0	g3p	0	0
ga3p	bpg	1	1	0	#DIV/0!	0	bpg	0		1	0	1	#DIV/0!	0	bpg	0	0
bpg	3pga	1	1	0	#DIV/0!	0	3pga	0		1	0	1	#DIV/0!	0	3pga	0	0
3pga	2pga	1	1	0	#DIV/0!	0	2pga	0		1	0	1	#DIV/0!	0	2pga	0	0
2pga	pep	1	1	0	#DIV/0!	0	pep	0		2	0	2	#DIV/0!	0	pep	-2.00997	2.00997
pep	pyr	2	1	1	-0.828427	-0.828427	pyr	-0.828427		3	2	1	-1.18154	-1.18154	pyr	0	-0.828427
pyr	acoa	2	2	0	#DIV/0!	0	acoa	0		3	0	3	#DIV/0!	0	acoa	-2.36308	2.36308
acoa	ac	1	1	0	#DIV/0!	0	ac	0		2	2	0	#DIV/0!	0	ac	0	0
acoa	cit	1	1	0	#DIV/0!	0	cit	0		3	2	1	-1.18154	-1.18154	cit	0	0
acoa	oaa	2	1	1	-0.828427	-0.828427	oaa	-1.65685		3	2	1	-1.18154	-1.18154	oaa	0	-1.65685
pep	oaa	2	1	1	-0.828427	-0.828427	mal	-1.65685		2	1	1	-0.828427	-0.828427	mal	0	-1.65685
oaa	mal	2	1	1	-0.828427	-0.828427	cisaco	0		1	0	1	#DIV/0!	0	cisaco	0	0
mal	pyr	3	2	1	-1.18154	0	isocit	0		1	0	1	#DIV/0!	0	isocit	0	0
cit	cisaco	1	1	0	#DIV/0!	0	akg	0		1	0	1	#DIV/0!	0	akg	0	0
cisaco	isocit	1	1	0	#DIV/0!	0	succoa	0		1	0	1	#DIV/0!	0	succoa	0	0
isocit	akg	1	1	0	#DIV/0!	0	suc	0		1	0	1	#DIV/0!	0	suc	0	0
akg	succoa	1	1	0	#DIV/0!	0	fum	0		1	0	1	#DIV/0!	0	fum	0	0
succoa	suc	1	1	0	#DIV/0!	0	g15l6p	0		2	0	2	#DIV/0!	0	g15l6p	0	0
suc	ac	1	1	0	#DIV/0!	0	gl6p	0		1	1	0	#DIV/0!	0	gl6p	0	0
suc	fum	1	1	0	#DIV/0!	0	ribl5p	0		2	2	1	-0.414214	-0.414214	ribl5p	-2.36308	2.36308
fum	mal	2	1	1	-0.828427	-0.828427	r5p	0		1	0	1	#DIV/0!	0	r5p	0	0
g15l6p	gl6p	1	1	0	#DIV/0!	0	prpp	0		1	0	1	#DIV/0!	0	prpp	0	0
gl6p	ribl5p	1	1	0	#DIV/0!	0	xyl5p	0		2	0	2	#DIV/0!	0	xyl5p	-1.18154	1.18154
ribl5p	r5p	1	1	0	#DIV/0!	0	sdhpt7p	-4.65561		3	1	2	-1.18154	-1.18154	sdhpt7p	0	-4.65561
r5p	prpp	1	1	0	#DIV/0!	0	f6p	0		1	1	0	#DIV/0!	0	f6p	0	0
ribl5p	xyl5p	1	1	0	#DIV/0!	0	erth4p	0		3	1	2	-1.18154	-1.18154	erth4p	-1.18154	1.18154
r5p	sdhpt7p	4	1	3	-1.4641	-1.4641	f16p	0		1	1	0	#DIV/0!	0	f16p	0	0
xyl5p	sdhpt7p	1	1	0	#DIV/0!	0				1	1	0	#DIV/0!	0
xyl5p	f6p	1	1	0	#DIV/0!	0				3	1	2	-1.18154	-1.18154
f6p	f16p	2	2	0	#DIV/0!	0				1	1	0	#DIV/0!	0
f6p	sdhpt7p	6	2	4	-2.36308	-2.36308				1	1	0	#DIV/0!	0
erth4p	f6p	1	0	1	#DIV/0!	0				3	1	2	-1.18154	-1.18154
erth4p	sdpth7p	2	1	1	-0.828427	-0.828427				1	1	0	#DIV/0!	0
acoa	malcoa	0	0	0	#DIV/0!	0	btcoa	0		1	0	1	#DIV/0!	0	btcoa	0	0
malcoa	hxcoa	2	1	1	-0.828427	-0.828427	occoa	-1.65685		11	10	1	-2.80471	-2.80471	occoa	-2.80471	1.14786
btcoa	hxcoa	1	0	1	#DIV/0!	0	hxcoa	-0.828427		1	0	1	#DIV/0!	0	hxcoa	-2.80471	1.97629
hxcoa	occoa	2	1	1	-0.828427	-0.828427	dccoa	-2.00997		1	0	1	#DIV/0!	0	dccoa	-2.80471	0.794746
malcoa	occoa	2	1	1	-0.828427	-0.828427	ddcoa	-2.00997		11	10	1	-2.80471	-2.80471	ddcoa	-2.80471	0.794746
occoa	dccoa	3	2	1	-1.18154	-1.18154	stdcoa	0		1	0	1	#DIV/0!	0	stdcoa	-1.18154	1.18154
malcoa	dccoa	2	1	1	-0.828427	-0.828427	eictrcoa	-1.65685		11	10	1	-2.80471	-2.80471	eictrcoa	-3.63314	1.97629
dccoa	ddcoa	3	2	1	-1.18154	-1.18154	dcotcoa	-1.65685		1	0	1	#DIV/0!	0	dcotcoa	-2.80471	1.14786
malcoa	ddcoa	2	1	1	-0.828427	-0.828427	eicpcoa	0		11	10	1	-2.80471	-2.80471	eicpcoa	0	0
ddcoa	tdcoa	3	2	1	-1.18154	-1.18154	eictcoa	-1.65685		1	0	1	#DIV/0!	0	eictcoa	-2.80471	1.14786
malcoa	tdcoa	2	1	1	-0.828427	-0.828427	dc4pcoa	0		11	10	1	-2.80471	-2.80471	dc4pcoa	0	0
tdcoa	pmtcoa	3	2	1	-1.18154	-1.18154	dcopcoa	-1.65685		1	0	1	#DIV/0!	0	dcopcoa	-2.80471	1.14786
malcoa	pmtcoa	2	1	1	-0.828427	-0.828427	dchxcoa	-0.414214		11	10	1	-2.80471	-2.80471	dchxcoa	0	-0.414214
pmtcoa	strcoa	3	2	1	-1.18154	-1.18154	acoa	0		1	0	1	#DIV/0!	0	acoa	0	0
malcoa	strcoa	2	1	1	-0.828427	-0.828427	acdcoa	-0.414214		11	10	1	-2.80471	-2.80471	acdcoa	0	-0.414214
strcoa	olcoa	2	2	0	#DIV/0!	0	malcoa	0		1	0	1	#DIV/0!	0	malcoa	0	0
olcoa	lincoa	1	1	0	#DIV/0!	0	strcoa	-1.18154		1	0	1	#DIV/0!	0	strcoa	0	-1.18154
lincoa	a-lincoa	1	1	0	#DIV/0!	0	pmtcoa	-2.00997		1	0	1	#DIV/0!	0	pmtcoa	-2.80471	0.794746
a-lincoa	g-lincoa	1	1	1	0	0	tdcoa	-2.00997		1	0	1	#DIV/0!	0	tdcoa	-2.80471	0.794746
g-lincoa	stdcoa	1	1	0	#DIV/0!	0	lincoa	0		3	2	1	-1.18154	-1.18154	lincoa	0	0
stdcoa	eictcoa	2	1	1	-0.828427	-0.828427	olcoa	0		1	0	1	#DIV/0!	0	olcoa	0	0
malcoa	eictcoa	2	1	1	-0.828427	-0.828427	glincoa	0		11	10	1	-2.80471	-2.80471	glincoa	0	0
eictcoa	eicpcoa	2	2	0	#DIV/0!	0	a-lincoa	0		1	0	1	#DIV/0!	0	a-lincoa	0	0
eicpcoa	dcopcoa	2	1	1	-0.828427	-0.828427				1	0	1	#DIV/0!	0
malcoa	dcopcoa	2	1	1	-0.828427	-0.828427				11	10	1	-2.80471	-2.80471
dcopocoa	dchxcoa	2	2	1	-0.414214	-0.414214				0	0	0	#DIV/0!	0
g-lincoa	eictrcoa	2	1	1	-0.828427	-0.828427				2	1	1	-0.828427	-0.828427
eictrcoa	acdcoa	2	2	1	-0.414214	-0.414214				1	0	1	#DIV/0!	0
malcoa	eictrcoa	2	1	1	-0.828427	-0.828427				11	10	1	-2.80471	-2.80471
acdcoa	dcotcoa	2	1	1	-0.828427	-0.828427				1	0	1	#DIV/0!	0
malcoa	dcotcoa	2	1	1	-0.828427	-0.828427				11	10	1	-2.80471	-2.80471
dcotcoa	dc4pcoa	2	2	0	#DIV/0!	0				0	0	0	#DIV/0!	0
3mgcoa	hmgcoa	2	0	2	#DIV/0!	0				1	0	1	#DIV/0!	0
acoa	hmgcoa	2	0	2	#DIV/0!	0				1	0	1	#DIV/0!	0
acacylcoa	hmgcoa	2	0	2	#DIV/0!	0				1	0	1	#DIV/0!	0
hmgcoa	mev	3	3	0	#DIV/0!	0				1	0	1	#DIV/0!	0
mev	mev5p	1	1	0	#DIV/0!	0				1	0	1	#DIV/0!	0
mev5p	mev5pp	1	1	0	#DIV/0!	0				1	0	1	#DIV/0!	0
mev5pp	ipdp	1	1	0	#DIV/0!	0				3	0	3	#DIV/0!	0
ipdp	dmpp	1	1	0	#DIV/0!	0				3	2	1	-1.18154	-1.18154
ipdp	geranylpp	2	1	1	-0.828427	-0.828427				3	2	1	-1.18154	-1.18154
ipdp	farnasylpp	2	1	1	-0.828427	-0.828427				3	2	1	-1.18154	-1.18154
dmpp	geranylpp	2	1	1	-0.828427	-0.828427				1	0	1	#DIV/0!	0
geranylpp	farnasylpp	3	2	1	-1.18154	-1.18154				1	0	1	#DIV/0!	0
farnasylpp	sql	2	2	0	#DIV/0!	0				1	0	1	#DIV/0!	0
sql	sql23epx	1	1	0	#DIV/0!	0				1	0	1	#DIV/0!	0
sql23epx	lanostr	1	1	0	#DIV/0!	0				1	0	1	#DIV/0!	0
lanostr	44mctr	1	1	0	#DIV/0!	0				2	1	1	-0.828427	-0.828427
lanostr	formate	1	1	0	#DIV/0!	0				1	1	0	#DIV/0!	0
44mctr	14dmls	1	1	0	#DIV/0!	0				1	0	1	#DIV/0!	0
14mdls	zym	1	1	0	#DIV/0!	0				1	0	1	#DIV/0!	0
zym	fecostr	1	1	0	#DIV/0!	0				1	0	1	#DIV/0!	0
fecostr	epistr	1	1	0	#VALUE!	0				1	0	1	#DIV/0!	0
epistr	ergsttr	1	1	0	#DIV/0!	0				1	0	1	#DIV/0!	0
ergsttr	ergsttet	1	1	0	#DIV/0!	0				1	0	1	#DIV/0!	0
ergsttet	ergstr	1	1	0	#DIV/0!	0				0	0	0	#DIV/0!	0
g3p	1ag3p	4	3	1	-1.4641	-1.4641				1	0	1	#DIV/0!	0
1ag3p	pa	4	2	2	-1.65685	-1.65685				2	0	2	#DIV/0!	0
acylcoa	1ag3p	1	0	1	#DIV/0!	0				3	2	1	-1.18154	-1.18154
acylcoa	pa	1	0	1	#DIV/0!	0				4	2	2	-1.65685	-1.65685
pa	12dgr	5	3	2	-2.03526	-2.03526				6	1	5	-1.92672	-1.92672
acylcoa	12dgr	2	0	2	#DIV/0!	0				7	2	5	-2.65774	-2.65774
12dgr	pa	5	3	2	-2.03526	-2.03526				7	4	3	-2.87408	-2.87408
pa	cdpdag	3	3	0	#DIV/0!	0				3	1	2	-1.18154	-1.18154
cdpdag	clpn	2	1	1	-0.828427	-0.828427				1	1	0	#DIV/0!	0
pg	clpn	1	0	1	#DIV/0!	0				0	0	0	#DIV/0!	0
cdpdag	ptd1ino	2	1	1	-0.828427	-0.828427				1	1	0	#DIV/0!	0
mino	ptd1ino	1	0	1	#DIV/0!	0				0	0	0	#DIV/0!	0
mag	12dgr	4	1	3	-1.4641	-1.4641				7	2	5	-2.65774	-2.65774
12dgr	mag	3	3	0	#DIV/0!	0				7	4	3	-2.87408	-2.87408
12dgr	fa	4	3	1	-1.4641	-1.4641				4	4	0	#DIV/0!	0
12dgr	tgr	3	3	0	#DIV/0!	0				4	4	0	#DIV/0!	0
12dgr	pe	3	3	0	#DIV/0!	0				7	4	3	-2.87408	-2.87408
cdpe	pe	2	1	1	-0.828427	-0.828427				3	0	3	#DIV/0!	0
peth	cdpe	0	0	0	#DIV/0!	0				0	0	0	#DIV/0!	0
pe	1g3pe	2	2	0	#DIV/0!	0				4	2	2	-1.65685	-1.65685
pe	carboxylate	3	2	1	-1.18154	-1.18154				2	2	0	#DIV/0!	0
1g3pe	g3pe	1	1	0	#DIV/0!	0				3	1	2	-1.18154	-1.18154
1g3pe	fa	2	1	1	-0.828427	-0.828427				1	1	0	#DIV/0!	0
g3pe	g3p	4	1	3	-1.4641	-1.4641				2	1	1	-0.828427	-0.828427
g3pe	ethan	1	1	0	#DIV/0!	0				1	1	0	#DIV/0!	0
pe	mmpe	2	2	0	#DIV/0!	0				3	2	1	-1.18154	-1.18154
mmpe	dimpe	1	1	0	#DIV/0!	0				1	0	1	#DIV/0!	0
dimpe	pc	1	1	0	#DIV/0!	0				1	0	1	#DIV/0!	0
pc	1g3pc	1	1	0	#DIV/0!	0				2	1	1	-0.828427	-0.828427
pc	carboxylate	2	1	1	-0.828427	-0.828427				1	1	0	#DIV/0!	0
1g3pc	g3pc	1	1	0	#DIV/0!	0				3	1	2	-1.18154	-1.18154
1g3pc	fa	1	1	0	#DIV/0!	0				1	1	0	#DIV/0!	0
g3pc	g3p	3	1	2	-1.18154	-1.18154				2	1	1	-0.828427	-0.828427
g3pc	chol	1	1	0	#DIV/0!	0				1	1	0	#DIV/0!	0
atp	adp	0	0	0	#DIV/0!	0				2	0	2	#DIV/0!	0
adp	dadp	1	1	0	#DIV/0!	0				2	1	1	-0.828427	-0.828427
dadp	damp	1	1	0	#DIV/0!	0				0	0	0	#DIV/0!	0
adp	amp	2	1	1	-0.828427	-0.828427				2	1	1	-0.828427	-0.828427
amp	imp	4	2	2	-1.65685	-1.65685				1	0	1	#DIV/0!	0
hxan	imp	2	0	2	#DIV/0!	0				1	0	1	#DIV/0!	0
prpp	imp	2	0	2	#DIV/0!	0				1	1	1	0	0
imp	xmp	5	3	2	-2.03526	-2.03526				2	0	2	#DIV/0!	0
xan	xmp	2	0	2	#DIV/0!	0				2	0	2	#DIV/0!	0
prpp	xmp	2	0	2	#DIV/0!	0				3	1	2	-1.18154	-1.18154
xmp	amp	4	3	1	-1.4641	-1.4641				2	1	1	-0.828427	-0.828427
xmp	gmp	4	3	1	-1.4641	-1.4641				1	1	0	#DIV/0!	0
gdp	gmp	2	1	1	-0.828427	-0.828427				1	1	0	#DIV/0!	0
gtp	gdp	0	0	0	#DIV/0!	0				2	0	2	#DIV/0!	0
gdp	dgdp	1	1	0	#DIV/0!	0				2	1	1	-0.828427	-0.828427
dgdp	dgmp	1	1	0	#DIV/0!	0				0	0	0	#DIV/0!	0
gln	carbp	0	0	0	#DIV/0!	0				1	0	1	#DIV/0!	0
carbp	carblasp	2	1	1	-0.828427	-0.828427				1	0	1	#DIV/0!	0
asp	carblasp	1	0	1	#DIV/0!	0				1	0	1	#DIV/0!	0
carblasp	dhort	2	2	0	#DIV/0!	0				2	0	2	#DIV/0!	0
dhort	ort	2	1	1	-0.828427	-0.828427				2	1	1	-0.828427	-0.828427
suc	ort	1	0	1	#DIV/0!	0				2	1	1	-0.828427	-0.828427
dhort	fum	2	1	1	-0.828427	-0.828427				1	1	0	#DIV/0!	0
suc	fum	0	0	0	#DIV/0!	#DIV/0!				0	0	0	#DIV/0!	0
ort	ortdn5p	2	2	0	#DIV/0!	#DIV/0!				1	0	1	#DIV/0!	0
ortdn5p	ump	3	1	2	-1.18154	-1.18154				1	0	1	#DIV/0!	0
ump	dtmp	3	3	0	#DIV/0!	0				0	0	0	#DIV/0!	0
udp	ump	3	0	3	#DIV/0!	0				1	0	1	#DIV/0!	0
dudp	ump	3	1	2	-1.18154	-1.18154				2	0	1	#DIV/0!	0
dutp	dudp	0	0	0	#DIV/0!	0				1	0	1	#DIV/0!	0
uridine	ump	4	1	3	-1.4641	-1.4641				1	0	1	#DIV/0!	0
cytidine	uridine	0	0	0	#DIV/0!	0				2	1	1	-0.828427	-0.828427
cytidine	cmp	1	0	1	#DIV/0!	0				1	1	0	#DIV/0!	0
cdp	cmp	2	1	1	-0.828427	-0.828427				1	1	0	#DIV/0!	0
ctp	cdp	0	0	0	#DIV/0!	0				2	0	2	#DIV/0!	0
cdp	dcdp	1	1	0	#DIV/0!	0				2	1	1	-0.828427	-0.828427
dcdp	dcmp	1	1	0	#DIV/0!	0				0	0	0	#DIV/0!	0
b-D-glc	b-D-glc6p	0	0	0	#DIV/0!	0		1		0	1	#DIV/0!	0
b-D-glc6p	b-D-fr6p	1	1	0	#DIV/0!	0		1		0	1	#DIV/0!	0
b-D-fr6p	b-D-fr16p	1	1	0	#DIV/0!	0		2		0	2	#DIV/0!	0
b-D-fr16p	ga3p	1	1	0	#DIV/0!	0		3		1	2	-1.18154	-1.18154
b-D-fr16p	dhap	1	1	0	#DIV/0!	0		2		1	1	-0.828427	-0.828427
ga3p	bpg	1	1	0	#DIV/0!	0		2		1	1	-0.828427	-0.828427
dhap	mg	2	1	1	-0.828427	-0.828427		1		0	1	#DIV/0!	0
ga3p	mg	2	1	1	-0.828427	-0.828427		2		1	1	-0.828427	-0.828427
bpg	3pga	1	1	0	#DIV/0!	0		1		0	1	#DIV/0!	0
3pga	2pga	1	1	0	#DIV/0!	0		1		0	1	#DIV/0!	0
2pga	pep	1	1	0	#DIV/0!	0		1		0	1	#DIV/0!	0
pep	pyr	2	1	1	-0.828427	-0.828427		0		0	0	#DIV/0!	0
mg	hta	3	2	1	-1.18154	-1.18154		1		0	1	#DIV/0!	0
t[sh]2	hta	4	3	1	-1.4641	-1.4641		1		0	1	#DIV/0!	0
D-lacgsh	D-lac	1	1	0	#DIV/0!	0		2		1	1	-0.828427	-0.828427
ts2	t[sh]2	2	0	2	#DIV/0!	0		1		0	1	#DIV/0!	0
gspd	t[sh]2	5	2	3	-2.03526	-2.03526		1		0	1	#DIV/0!	0
gsh	t[sh]2	5	2	3	-2.03526	-2.03526		2		1	1	-0.828427	-0.828427
gsh	gspd	3	2	1	-1.18154	-1.18154		2		1	1	-0.828427	-0.828427
spd	gspd	3	2	1	-1.18154	-1.18154		1		0	1	#DIV/0!	0
put	spd	2	1	1	-0.828427	-0.828427		1		0	1	#DIV/0!	0
adometam	spd	2	1	1	-0.828427	-0.828427		1		0	1	#DIV/0!	0
adomet	adometam	1	1	0	#DIV/0!	0		1		0	1	#DIV/0!	0
met	adomet	0	0	0	#DIV/0!	0		1		0	1	#DIV/0!	0
g-glycys	gsh	3	2	1	-1.18154	-1.18154		2		0	2	#DIV/0!	0
gly	gsh	1	0	1	#DIV/0!	0		2		0	2	#DIV/0!	0
glu	g-glycys	1	0	1	#DIV/0!	0		1		0	1	#DIV/0!	0
cys	g-glycys	1	0	1	#DIV/0!	0		1		0	1	#DIV/0!	0
arg	orn	0	0	0	#DIV/0!	0		2		1	1	-0.828427	-0.828427
arg	urea	0	0	0	#DIV/0!	0		1		1	0	#DIV/0!	0
arg	orn	1	0	1	#DIV/0!	0		2		1	1	-0.828427	-0.828427

## Sheet: FBA reactions_M7Model
Reaction name	Reaction
'HK[aDglc6p]'	'a-D-glc + atp -> a-D-glc6p + adp '
'HK[bDglc6p]'	'b-D-glc + atp -> b-D-glc6p + adp '
'HK[aDglc6p-bDfr6p]'	'a-D-glc6p + atp <=> adp + b-D-fr6p '
'HK[bDglc6p-bDfr6p]'	'b-D-glc6p + atp <=> adp + b-D-fr6p '
'PFK'	'atp + b-D-fr6p <=> adp + b-D-fr16p '
'FBP'	'h2o + b-D-fr16p <=> pi + b-D-fr6p '
'ALD'	'b-D-fr16p <=> ga3p + dhap '
'TPI'	'dhap <=> ga3p '
'GAPDH'	'pi + nad + ga3p <=> h + nadh + bpg '
'PGK'	'atp + bpg <=> adp + 3pga '
'PGM'	'3pga <=> 2pga '
'Enolase'	'2pga <=> h2o + pep '
'PPDK'	'pi + pyr + atp -> pep + ppi + amp '
'NADHDH(CI)'	'h + nadh -> nad '
'NADHORD(CI)'	'h + nadh -> nad '
'F-ATPase(CV)'	'pi + adp -> 2 h + h2o + atp '
'V-ATPase(CV)'	'pi + adp -> 2 h + h2o + atp '
'P-ATPase(CV)'	'h2o + atp -> h + pi + adp '
'inorganicPyroP'	'h2o + ppi -> h + 2 pi '
'AcidoCalciPyroP'	'h2o + ppi -> h + pi '
'Vac-PyroP'	'h2o + ppi -> h + 2 pi '
'Ca2-ATPase'	'h2o + atp -> h + pi + adp + ca2 '
'Ca2-P-ATPase'	'h2o + atp -> h + pi + adp + ca2 '
'ATPM'	'32.26 h2o + 32.26 atp -> 32.26 h + 32.26 pi + 32.26 adp '
'ACoATr'	'pyr + suc -> succoa + ac '
'arginase'	'h2o + arg -> orn + urea '
'ODC'	'orn -> co2 + put '
'SAMS'	'h2o + atp + met -> pi + ppi + adomet '
'SAMDc'	'h + adomet -> adometam '
'SpdS'	'adometam + put -> 5mthado + spd '
'GSH1'	'atp + glu + cys -> pi + adp + g-glucys '
'GSH2'	'atp + g-glucys -> pi + adp + gsh '
'TryS(gspd Synthesis)'	'gsh + spd -> h2o + gspd '
'TryS(tsh2 Synthesis)'	'gsh + gspd -> h2o + t[sh]2 '
'TDPx'	t[sh]2 + h2o2 -> 2 h2o + ts2'
'TR'	h + nadph + ts2 -> t[sh]2 + nadp'
'TXN_reduction'	t[sh]2 + txno -> ts2 + txnr'
'GA3PtoMGO'	ga3p -> pi + mg'
DHAPtoMGO'	'dhap -> pi + mg '
'HTA_SpontaneousSynthesis'	't[sh]2 + mg -> hta '
'GLOI'	'hta -> D-lacgsh '
'GLOII'	'h2o + D-lacgsh -> h + t[sh]2 + D-lac '
'DLDH'	'nad + D-lac -> h + pyr + nadh '
'NADPH_demand'	'nadph <=> h + nadp '
'AGEs formation_lys'	'mg + lys -> mg-lys + MG.- '
'AGEs formation_arg'	'arg + mg -> mg-arg + MG.- '
'PK'	'atp + pep -> 2 pyr + adp '
'Ser Synthesis_Lumped'	'h2o + nad + 3pga -> h + pi + nadh + ser + akg '
'Glu Synthesis_Lumped'	'h + nadph + akg + nh4 -> h2o + glu + nadp '
'SHMT(Gly Synthesis)'	'ser + thf -> gly + mthf '
'Cys Synthesis_Lumped'	'ser + acoa + h2s -> h + ac + cys + coa '
'co2_t[c-e]passiveDiffusion'	'co2 -> co2[e] '
h2o_t'	'h2o[e] <=> h2o '
'h_t'	'h <=> h[e] '
'pi_t'	'h + pi <=> pi[e] + h[e] '
'a-D-glc_t'	'h[e] + a-D-glc[e] -> h + a-D-glc '
b-D-glc_t'	'h[e] + b-D-glc[e] -> h + b-D-glc '
'ca2_t'	'h2o + atp + ca2[e] -> h + pi + adp + ca2 '
'Arg_t'	'h[e] + arg[e] -> h + arg '
'glu_t'	'glu[e] -> glu '
'cys_t'	'cys[e] -> cys '
'met_t'	'met[e] -> met '
'urea_t'	'urea -> urea[e] '
'5mthado_t'	'5mthado -> 5mthado[e] '
'succoa_t'	'succoa -> succoa[e] '
'suc_t'	'suc[e] -> suc '
'amp_t'	'amp -> amp[e] '
'lys_t'	'lys[e] -> lys '
'nh4_t'	'nh4[e] -> nh4 '
'h2s_t'	'h2s[e] -> h2s '
'acoa_t'	'acoa[e] -> acoa '
'B'	'pyr + h2o + atp + D-lac -> h + pi + adp '
'D-lac_secretion'	'D-lac -> D-lac[e] '
'Pyr_excretion'	'pyr -> pyr[e] '
'ac_excretion'	'h + ac -> ac[e] + h[e] '
'aKG_excretion'	'akg -> akg[e] '
'EX_h[e]'	'h[e] <=> '
'EX_pi[e]'	'pi[e] <=> '
'EX_co2[e]'	'co2[e] <=> '
'EX_h2o[e]'	'h2o[e] <=> '
'EX_ac[e]'	'ac[e] <=> '
'EX_a-D-glc[e]'	'a-D-glc[e] <=> '
'EX_b-D-glc[e]'	'b-D-glc[e] <=> '
'EX_ca2[e]'	'ca2[e] <=> '
'EX_arg[e]'	'arg[e] <=> '
'EX_cys[e]'	'cys[e] <=> '
'EX_glu[e]'	'glu[e] <=> '
'EX_met[e]'	'met[e] <=> '
'EX_urea[e]'	'urea[e] <=> '
'EX_5mthado'	'5mthado <=> '
'EX_succoa[e]'	'succoa[e] <=> '
'EX_suc[e]'	'suc[e] <=> '
'EX_amp[e]'	'amp[e] <=> '
'EX_L-lac[e]'	'L-lac[e] <=> '
'EX_lys[e]'	'lys[e] <=> '
'EX_nh4[e]'	'nh4[e] <=> '
'EX_acoa[e]'	'acoa[e] <=> '
'EX_h2s[e]'	'h2s[e] <=> '
'EX_pyr[e]'	'pyr[e] <=> '
'EX_D-lac[e]'	'D-lac[e] <=> '
'DM_met'	'met -> '
'DM_cys'	'cys -> '
'DM_glu'	'glu -> '
'DM_arg'	'arg -> '
'DM_atp'	'atp -> '
'DM_t[sh]2'	't[sh]2 -> '
'DM_nadph'	'nadph -> '
'DM_nadp'	'nadp -> '
'DM_MG.-'	'MG.- -> '
'DM_mg-arg'	'mg-arg -> '
'DM_mg-lys'	'mg-lys -> '

## Sheet: Adjacency_M7Model
	'pyr'	'dhap'	't[sh]2'	'adomet'	'met'	'gly'	'cys'	'arg'	'orn'	'urea'	'adometam'	'put'	'g-glycys'	'gsh'	'spd'	'gspd'	'ts2'	'glu'	'b-D-fr6p'	'b-D-fr16p'	'ga3p'	'mg'	'bpg'	'hta'	'3pga'	'D-lacgsh'	'2pga'	'pep'	'b-D-glc'	'b-D-glc6p'	'D-lac'	'L-lactald'	'L-lac'
'pyr'	0	0	0	0	0	0	0	0	0	0	0	0	0	0	0	0	0	0	0	0	0	0	0	0	0	0	0	0	0	0	0	0	0
'dhap'	0	0	0	0	0	0	0	0	0	0	0	0	0	0	0	0	0	0	0	0	0	1	0	0	0	0	0	0	0	0	0	0	0
't[sh]2'	0	0	0	0	0	0	0	0	0	0	0	0	0	0	0	0	0	0	0	0	0	0	0	1	0	0	0	0	0	0	0	0	0
'adomet'	0	0	0	0	0	0	0	0	0	0	1	0	0	0	0	0	0	0	0	0	0	0	0	0	0	0	0	0	0	0	0	0	0
'met'	0	0	0	1	0	0	0	0	0	0	0	0	0	0	0	0	0	0	0	0	0	0	0	0	0	0	0	0	0	0	0	0	0
'gly'	0	0	0	0	0	0	0	0	0	0	0	0	0	1	0	0	0	0	0	0	0	0	0	0	0	0	0	0	0	0	0	0	0
'cys'	0	0	0	0	0	0	0	0	0	0	0	0	1	0	0	0	0	0	0	0	0	0	0	0	0	0	0	0	0	0	0	0	0
'arg'	0	0	0	0	0	0	0	0	1	1	0	0	0	0	0	0	0	0	0	0	0	0	0	0	0	0	0	0	0	0	0	0	0
'orn'	0	0	0	0	0	0	0	0	0	0	0	1	0	0	0	0	0	0	0	0	0	0	0	0	0	0	0	0	0	0	0	0	0
'urea'	0	0	0	0	0	0	0	0	0	0	0	0	0	0	0	0	0	0	0	0	0	0	0	0	0	0	0	0	0	0	0	0	0
'adometam'	0	0	0	0	0	0	0	0	0	0	0	0	0	0	1	0	0	0	0	0	0	0	0	0	0	0	0	0	0	0	0	0	0
'put'	0	0	0	0	0	0	0	0	0	0	0	0	0	0	1	0	0	0	0	0	0	0	0	0	0	0	0	0	0	0	0	0	0
'g-glycys'	0	0	0	0	0	0	0	0	0	0	0	0	0	1	0	0	0	0	0	0	0	0	0	0	0	0	0	0	0	0	0	0	0
'gsh'	0	0	1	0	0	0	0	0	0	0	0	0	0	0	0	1	0	0	0	0	0	0	0	0	0	0	0	0	0	0	0	0	0
'spd'	0	0	0	0	0	0	0	0	0	0	0	0	0	0	0	1	0	0	0	0	0	0	0	0	0	0	0	0	0	0	0	0	0
'gspd'	0	0	1	0	0	0	0	0	0	0	0	0	0	0	0	0	0	0	0	0	0	0	0	0	0	0	0	0	0	0	0	0	0
'ts2'	0	0	1	0	0	0	0	0	0	0	0	0	0	0	0	0	0	0	0	0	0	0	0	0	0	0	0	0	0	0	0	0	0
'glu'	0	0	0	0	0	0	0	0	0	0	0	0	1	0	0	0	0	0	0	0	0	0	0	0	0	0	0	0	0	0	0	0	0
'b-D-fr6p'	0	0	0	0	0	0	0	0	0	0	0	0	0	0	0	0	0	0	0	1	0	0	0	0	0	0	0	0	0	0	0	0	0
'b-D-fr16p'	0	0	0	0	0	0	0	0	0	0	0	0	0	0	0	0	0	0	0	0	1	0	0	0	0	0	0	0	0	0	0	0	0
'ga3p'	0	0	0	0	0	0	0	0	0	0	0	0	0	0	0	0	0	0	0	0	0	1	1	0	0	0	0	0	0	0	0	0	0
'mg'	0	1	0	0	0	0	0	0	0	0	0	0	0	0	0	0	0	0	0	0	1	0	0	1	0	0	0	0	0	0	0	1	0
'bpg'	0	0	0	0	0	0	0	0	0	0	0	0	0	0	0	0	0	0	0	0	0	0	0	0	1	0	0	0	0	0	0	0	0
'hta'	0	0	1	0	0	0	0	0	0	0	0	0	0	0	0	0	0	0	0	0	0	1	0	0	0	1	0	0	0	0	0	0	0
'3pga'	0	0	0	0	0	0	0	0	0	0	0	0	0	0	0	0	0	0	0	0	0	0	0	0	0	0	1	0	0	0	0	0	0
'D-lacgsh'	0	0	0	0	0	0	0	0	0	0	0	0	0	0	0	0	0	0	0	0	0	0	0	0	0	0	0	0	0	0	1	0	0
'2pga'	0	0	0	0	0	0	0	0	0	0	0	0	0	0	0	0	0	0	0	0	0	0	0	0	0	0	0	1	0	0	0	0	0
'pep'	1	0	0	0	0	0	0	0	0	0	0	0	0	0	0	0	0	0	0	0	0	0	0	0	0	0	0	0	0	0	0	0	0
'b-D-glc'	0	0	0	0	0	0	0	0	0	0	0	0	0	0	0	0	0	0	0	0	0	0	0	0	0	0	0	0	0	1	0	0	0
'b-D-glc6p'	0	0	0	0	0	0	0	0	0	0	0	0	0	0	0	0	0	0	1	0	0	0	0	0	0	0	0	0	0	0	0	0	0
'D-lac'	1	0	0	0	0	0	0	0	0	0	0	0	0	0	0	0	0	0	0	0	0	0	0	0	0	0	0	0	0	0	0	0	0
'L-lactald'	0	0	0	0	0	0	0	0	0	0	0	0	0	0	0	0	0	0	0	0	0	0	0	0	0	0	0	0	0	0	0	0	1
'L-lac'	0	0	0	0	0	0	0	0	0	0	0	0	0	0	0	0	0	0	0	0	0	0	0	0	0	0	0	0	0	0	0	0	0

## Sheet: Forman_Degree_M7Model
		IN FORMAN						OUT FORMAN
		total Weight for In Forman	In degree					total Weight for Out Forman	out degree
ev1v2		In degree weight	v1	v2	FI	FInormalized		Out degree weight	v1	v2	Fo	Fonormalized		FI- FO
b-D-glc	b-D-glc6p	0	0	0	#DIV/0!	0		1	0	1	#DIV/0!	0		0
b-D-glc6p	b-D-fr6p	1	1	0	#DIV/0!	0		1	0	1	#DIV/0!	0		0
b-D-fr6p	b-D-fr16p	1	1	0	#DIV/0!	0		2	0	2	#DIV/0!	0		0
b-D-fr16p	ga3p	1	1	0	#DIV/0!	0		3	1	2	-1.18154	-1.18154		1.18154
b-D-fr16p	dhap	1	1	0	#DIV/0!	0		2	1	1	-0.828427	-0.828427		0.828427
ga3p	bpg	1	1	0	#DIV/0!	0		2	1	1	-0.828427	-0.828427		0.828427
dhap	mg	2	1	1	-0.828427	-0.828427		1	0	1	#DIV/0!	0		-0.828427
ga3p	mg	2	1	1	-0.828427	-0.828427		2	1	1	-0.828427	-0.828427		0
bpg	3pga	1	1	0	#DIV/0!	0		1	0	1	#DIV/0!	0		0
3pga	2pga	1	1	0	#DIV/0!	0		1	0	1	#DIV/0!	0		0
2pga	pep	1	1	0	#DIV/0!	0		1	0	1	#DIV/0!	0		0
pep	pyr	2	1	1	-0.828427	-0.828427		0	0	0	#DIV/0!	0		-0.828427
mg	hta	3	2	1	-1.18154	-1.18154		1	0	1	#DIV/0!	0		-1.18154
t[sh]2	hta	4	3	1	-1.4641	-1.4641		1	0	1	#DIV/0!	0		-1.4641
D-lacgsh	D-lac	1	1	0	#DIV/0!	0		2	1	1	-0.828427	-0.828427		0.828427
ts2	t[sh]2	2	0	2	#DIV/0!	0		1	0	1	#DIV/0!	0		0
gspd	t[sh]2	5	2	3	-2.03526	-2.03526		1	0	1	#DIV/0!	0		-2.03526
gsh	t[sh]2	5	2	3	-2.03526	-2.03526		2	1	1	-0.828427	-0.828427		-1.20683
gsh	gspd	3	2	1	-1.18154	-1.18154		2	1	1	-0.828427	-0.828427		-0.353113
spd	gspd	3	2	1	-1.18154	-1.18154		1	0	1	#DIV/0!	0		-1.18154
put	spd	2	1	1	-0.828427	-0.828427		1	0	1	#DIV/0!	0		-0.828427
adometam	spd	2	1	1	-0.828427	-0.828427		1	0	1	#DIV/0!	0		-0.828427
adomet	adometam	1	1	0	#DIV/0!	0		1	0	1	#DIV/0!	0		0
met	adomet	0	0	0	#DIV/0!	0		1	0	1	#DIV/0!	0		0
g-glycys	gsh	3	2	1	-1.18154	-1.18154		2	0	2	#DIV/0!	0		-1.18154
gly	gsh	1	0	1	#DIV/0!	0		2	0	2	#DIV/0!	0		0
glu	g-glycys	1	0	1	#DIV/0!	0		1	0	1	#DIV/0!	0		0
cys	g-glycys	1	0	1	#DIV/0!	0		1	0	1	#DIV/0!	0		0
arg	orn	0	0	0	#DIV/0!	0		2	1	1	-0.828427	-0.828427		0.828427
arg	urea	0	0	0	#DIV/0!	0		1	1	0	#DIV/0!	0		0
arg	orn	1	0	1	#DIV/0!	0		2	1	1	-0.828427	-0.828427		0.828427

## Sheet: CytoscapeStates_M7Model
BetweennessCentrality	ClosenessCentrality	ClusteringCoefficient	Eccentricity	EdgeCount	Indegree	IsSingleNode	name	NeighborhoodConnectivity	Outdegree
0	0	0	0	2	2	FALSE	'pyr'	2	0
0	0.302326	0	6	2	1	FALSE	'dhap'	4	1
0.183468	0.276596	0.0833333	7	5	4	FALSE	't[sh]2'	2.75	1
0.0171371	0.155963	0	11	2	1	FALSE	'adomet'	1.5	1
0	0.141732	0	12	1	0	FALSE	'met'	2	1
0	0.205128	0	9	1	0	FALSE	'gly'	4	1
0	0.178947	0	10	1	0	FALSE	'cys'	3	1
0	0.148438	0	12	2	0	FALSE	'arg'	1.5	2
0.0171371	0.155963	0	11	2	1	FALSE	'orn'	2	1
0	0	0	0	1	1	FALSE	'urea'	2	0
0.0322581	0.173913	0	10	2	1	FALSE	'adometam'	2.5	1
0.0322581	0.173913	0	10	2	1	FALSE	'put'	2.5	1
0.0322581	0.205128	0	9	3	2	FALSE	'g-glycys'	2	1
0.0604839	0.241935	0.0833333	8	4	2	FALSE	'gsh'	2.75	2
0.0907258	0.197368	0	9	3	2	FALSE	'spd'	2.33333	1
0.0987903	0.229508	0.166667	8	3	2	FALSE	'gspd'	3.66667	1
0	0.229508	0	8	1	0	FALSE	'ts2'	4	1
0	0.178947	0	10	1	0	FALSE	'glu'	3	1
0.0302419	0.234375	0	7	2	1	FALSE	'b-D-fr6p'	2	1
0.0423387	0.285714	0	6	2	1	FALSE	'b-D-fr16p'	2.5	1
0.125	0.371429	0	5	4	2	FALSE	'ga3p'	2.66667	2
0.178931	0.419355	0	5	7	3	FALSE	'mg'	2.25	4
0.0720766	0.4	0	4	2	1	FALSE	'bpg'	2.5	1
0.207157	0.371429	0	6	5	2	FALSE	'hta'	3.33333	3
0.0519153	0.5	0	3	2	1	FALSE	'3pga'	2	1
0.0438508	0.666667	0	2	2	1	FALSE	'D-lacgsh'	2.5	1
0.0297379	0.666667	0	2	2	1	FALSE	'2pga'	2	1
0.00554435	1	0	1	2	1	FALSE	'pep'	2	1
0	0.175258	0	9	1	0	FALSE	'b-D-glc'	2	1
0.016129	0.2	0	8	2	1	FALSE	'b-D-glc6p'	1.5	1
0.0216734	1	0	1	2	1	FALSE	'D-lac'	2	1
0.0231855	1	0	1	2	1	FALSE	'L-lactald'	2.5	1
0	0	0	0	1	1	FALSE	'L-lac'	2	0

[truncated: 2 more sheets: Forman_Coef_M7Model, F(e)forDistributationPlot]
