# Supplementary material for: Integrative Computational Framework for Understanding Metabolic Modulation in Leishmania
Source: Front Bioeng Biotechnol. 2019 Nov 19;7:336. doi: 10.3389/fbioe.2019.00336 (PMC6877600; doi:10.3389/fbioe.2019.00336)
Supplement: Table S5 — List of various metabolic components of Master and M1 to M7 models. [file Table_5.xlsx]

## Sheet: Sheet1
Model components
Master	M1	M2	M3	M4	M5	M6	M7
acoa	pyr	pyr	btcoa	farnasylpp	g3p	prpp	pyr
hta	mal	akg	occoa	geranylpp	glycerol	carbp	dhap
t[sh]2	b-D-fr16p	oaa	hxcoa	ipdp	clpn	carblasp	t[sh]2
pyr	oaa	mal	dccoa	sql	1ag3p	dhort	adomet
mg	acoa	3pga	ddcoa	mev	pg	ort	met
akg	suc	formate	stdcoa	mev5p	acylcoa	ortdn5p	gly
3pga	ribl5p	ala	eictrcoa	dmpp	mino	uridine	cys
ga3p	r5p	asp	dcotcoa	lanostr	cdpdag	cytidine	arg
gsh	xyl5p	gln	eicpcoa	44mctr	pa	cdp	orn
bpg	f6p	met	eictcoa	14dmls	ptd1ino	hxan	urea
3phpyr	man1p	thf	dc4pcoa	ergsttr	mag	xan	adometam
glu	gdpman	gly	dcopcoa	mev5pp	12dgr	suc	put
gspd	ga3p	mthf	dchxcoa	fecostr	fa(pmtacid)	gln	g-glycys
cys	dhap	cys	acoa	ergsttet	tgr	amp	gsh
spd	bpg	ser	acdcoa	sql23epx	cdpe	asp	spd
oacser	3pga	glu	malcoa	epistr	peth	fum	gspd
D-lac	2pga	pro	strcoa	zym	pe	cmp	ts2
g3p	pep	acald	pmtcoa	hmgcoa	1g3pe	ctp	glu
dhap	cit	thr	tdcoa	3mgcoa	g3pe	gmp	b-D-fr6p
1ag3p	cisaco	asn	lincoa	acacylcoa	ethan	dgmp	b-D-fr16p
D-lacgsh	isocit	trp	olcoa	ergstr	carboxylate	damp	ga3p
pa	akg	anthra	glincoa	formate	mmpe	dcmp	mg
isocit	succoa	phe	a-lincoa	acoa	1g3pc	dtmp	bpg
hmgcoa	fum	tyr			pc	gtp	hta
mal	g15l6p	fol			dimpe	gdp	3pga
mev	gl6p	dhf			g3pc	atp	D-lacgsh
cisaco	b-D-glc	dhpt			chol	adp	2pga
fum	b-D-glc6p	thfglu				xmp	pep
mev5p	b-D-fr6p	thfpolyglu				dgdp	b-D-glc
cit	fructose	3phpyr				imp	b-D-glc6p
mev5pp	mannose	3pser				dadp	D-lac
ipdp	man6p	oacser				udp	L-lactald
12dgr	mannan	aspsa				dcdp	L-lac
g-glycys	g3p	hser				dudp
adometam	ac	phser				dutp
adomet	prpp	1pl5c				ump
malcoa	sdhpt7p	cysthion
2maacoa	erth4p	hcys
met	f16p	phepyr
suc		34hpp
farnasylpp		4m2opent
3hmbcoa		leu
succoa		2oivlrt
sql		val
ser		3m2opent
2mbecoa		ile
sql23epx		nflk
3pser		l-kyn
pe		acoa
2mbcoa		3mob
lanostr		3mop
2mbutdhla		4mop
3mop		3mbutdhla
44mctr		2mbutdhla
ile		2mpdhla
hcys		ivcoa
val		2mbcoa
b-D-fr16p		ibcoa
ort		2mbecoa
14dmls		3mb2coa
3mob		macoa
cysthion		3mgcoa
ortdn5p		3hibcoa
2mpdhla		3hmbcoa
dhort		3hib
zym		2maacoa
b-D-fr6p		mmsald
mthf		mmalonat
ala		ppcoa
ibcoa		malcoa
mmpe		3mercpyr
leu		adometam
gly		g-glucys
carblasp		gsh
macoa		adomet
fecostr		lplprot
dimpe		dhlplprot
4mop		amlplprot
pep		42aphdob
3hibcoa		adesuc
prpp		fum
3mbutdhla
amlplprot
carbp
l-kyn
put
pc
epistr
3hib
ivcoa
2pga
gln
1g3pc
1g3pe
mmsald
3mb2coa
ergsttr
cdpdag
b-D-glc6p
nflk
g3pc
lplprot
orn
thf
3mgcoa
mmalonat
g3pe
adesuc
ergsttet
eictrcoa
mag
dcopcoa
dcotcoa
dgdp
dadp
ump
thfglu
tyr
L-lactald
1pl5c
ribl5p
gl6p
r5p
glincoa
g15l6p
cdpe
a-lincoa
stdcoa
man6p
eictcoa
geranylpp
xyl5p
man1p
dccoa
ddcoa
eicpcoa
lincoa
occoa
acdcoa
tdcoa
xmp
imp
glycerol
amp
gdpman
f6p
hxcoa
pmtcoa
adp
fol
dhf
hser
cdp
gdp
anthra
aspsa
phser
uridine
dcdp
dudp
phe
dhlplprot
b-D-glc
mannan
oaa
sdhpt7p
erth4p
f16p
ac
mannose
fructose
btcoa
dc4pcoa
dchxcoa
strcoa
olcoa
dmpp
acacylcoa
ergstr
formate
clpn
pg
acylcoa
mino
ptd1ino
fa(pmtacid)
tgr
peth
ethan
carboxylate
chol
cytidine
hxan
xan
asp
cmp
ctp
gmp
dgmp
damp
dcmp
dtmp
gtp
atp
udp
dutp
arg
urea
ts2
L-lac
pro
acald
thr
asn
trp
dhpt
thfpolyglu
phepyr
34hpp
4m2opent
2oivlrt
3m2opent
ppcoa
3mercpyr
42aphdob
